# Supplementary material
Source: publisher figshare collection journal article supplement (https://acs.figshare.com/ndownloader/files/4146313)

# Supporting Information for

## Diastereoselective [4+1] Cycloaddition of Alkenyl Propargyl Acetates with CO

Catalyzed by  $[\text{RhCl}(\text{CO})_2]_2$

Wei Chen, Jia-Hui Tay, Xiao-Qi Yu\* and Lin Pu\*

|             |                                                                                |             |
|-------------|--------------------------------------------------------------------------------|-------------|
| <b>I.</b>   | Analytical Instruments                                                         | <b>S-2</b>  |
| <b>II.</b>  | General Data.                                                                  | <b>S-2</b>  |
| <b>III.</b> | $^1\text{H}$ NMR, $^{13}\text{C}$ , and 2D NMR Spectra                         | <b>S-2</b>  |
| 1.          | Alkenyl Propargylic Ester <b>3</b>                                             | <b>S-2</b>  |
| 2.          | Alkenyl Propargylic Acetates <b>5</b>                                          | <b>S-3</b>  |
| 3.          | [4+1] cycloaddition products <b>4 &amp; 6 &amp; 11</b>                         | <b>S-21</b> |
| 4.          | NOESY 2D NMR Spectra of <i>E</i> - <b>6d</b> (a) and <i>Z</i> - <b>6d</b> (b). | <b>S-48</b> |
| 5.          | NOESY 2D NMR Spectra of <b>Z-11a</b>                                           | <b>S-49</b> |
| 6.          | NMR spectra Used to Determine the <i>E-Z</i> ratio                             | <b>S-50</b> |

### I. Analytical Instruments:

High resolution mass spectra were obtained by EI [70-VSE(C)] or ESI (Q-ToF) analysis and the [M] or [MH<sup>+</sup>] was observed.

### II. General Data:

All commercial chemicals were used as received unless otherwise noted.

[RhCl(CO)<sub>2</sub>]<sub>2</sub> was purchased and stored in a dry nitrogen atmosphere.

THF was distilled over sodium and benzophenone under nitrogen atmosphere. to prepare alkenyl propargylic acetate according to the general method used.

### III. <sup>1</sup>H NMR, <sup>13</sup>C, and 2D NMR Spectra

#### 1. Alkenyl Propargylic Ester 3

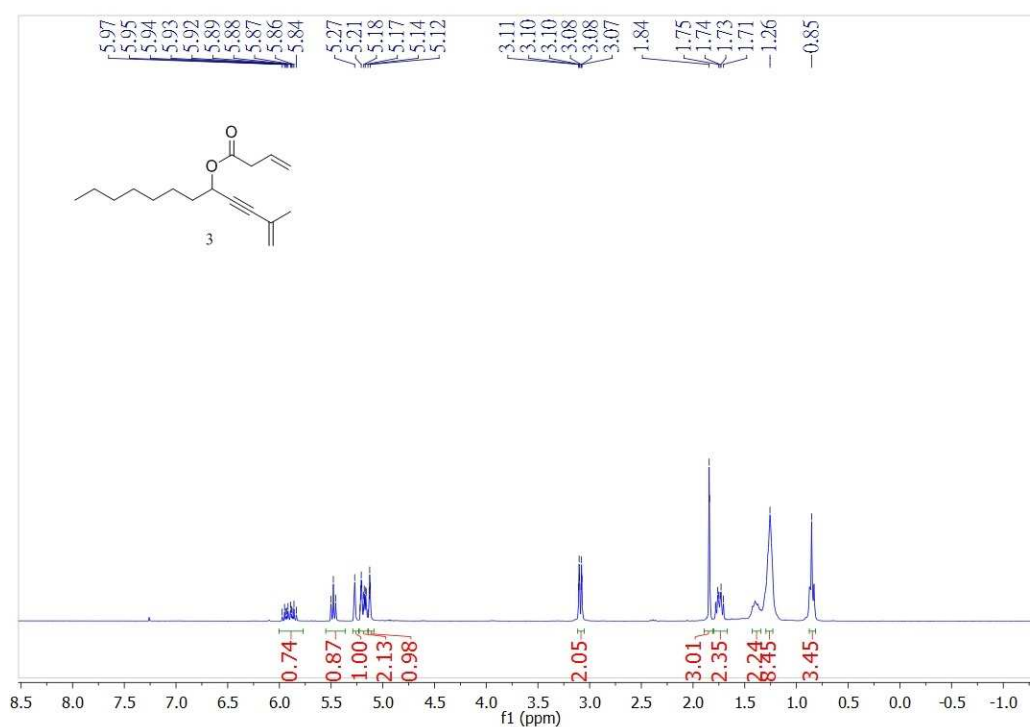

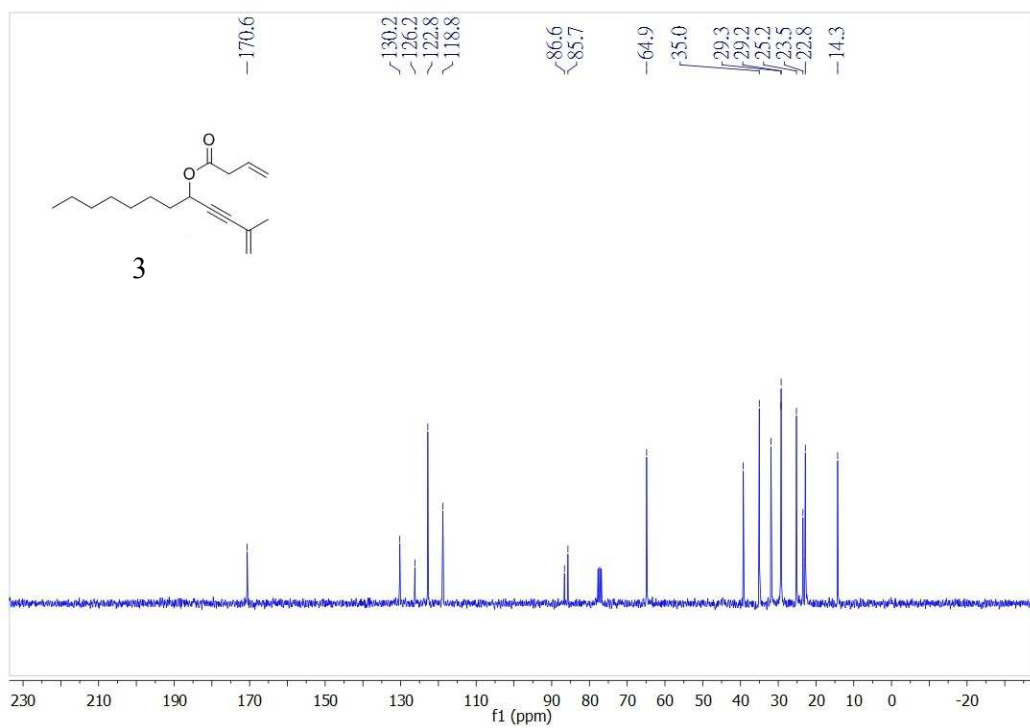

### 3. Alkenyl Propargylic Acetates **5**

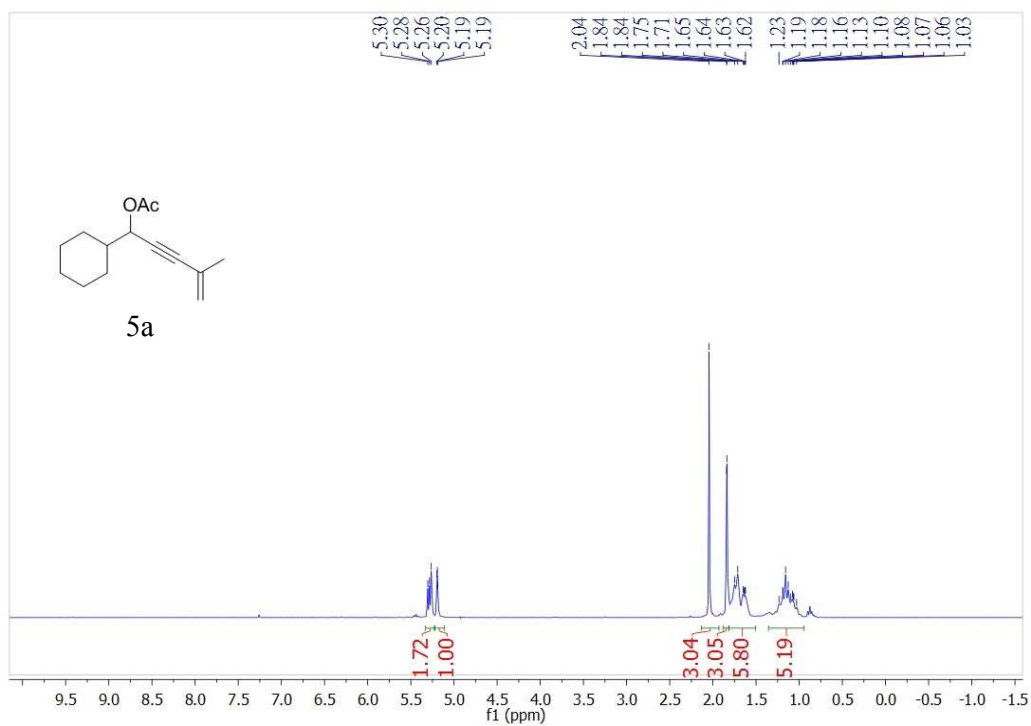

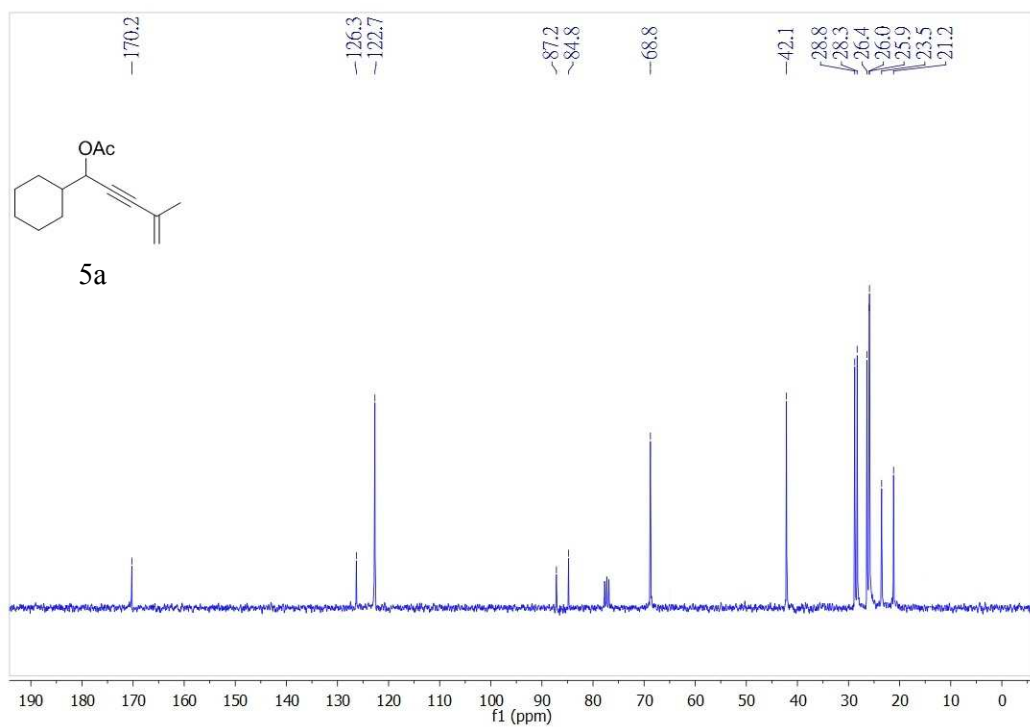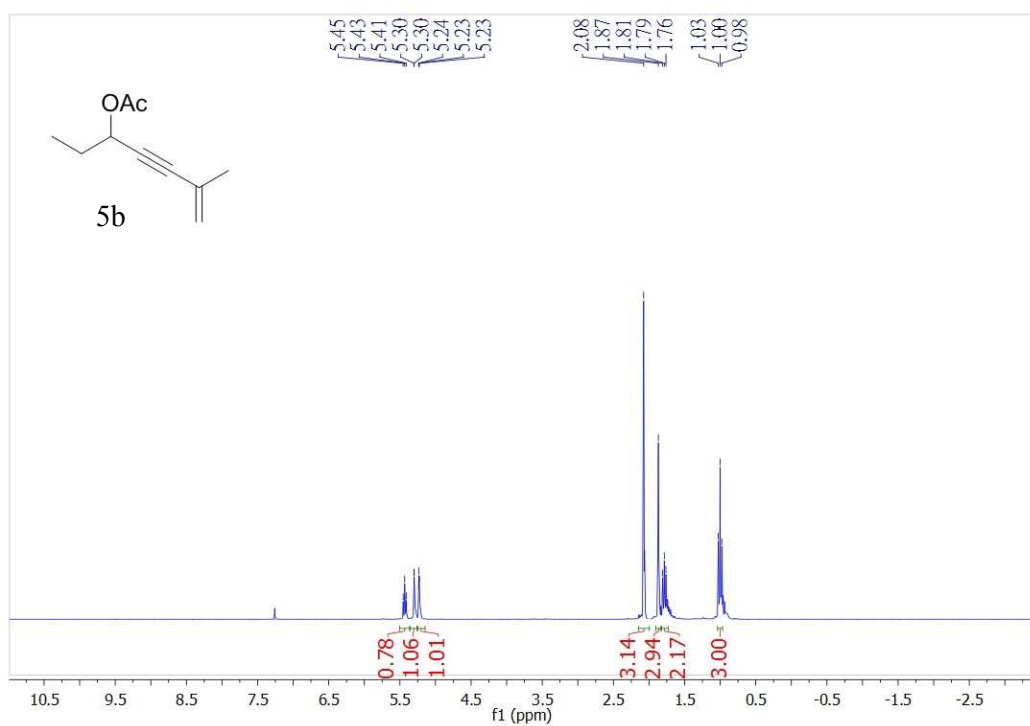

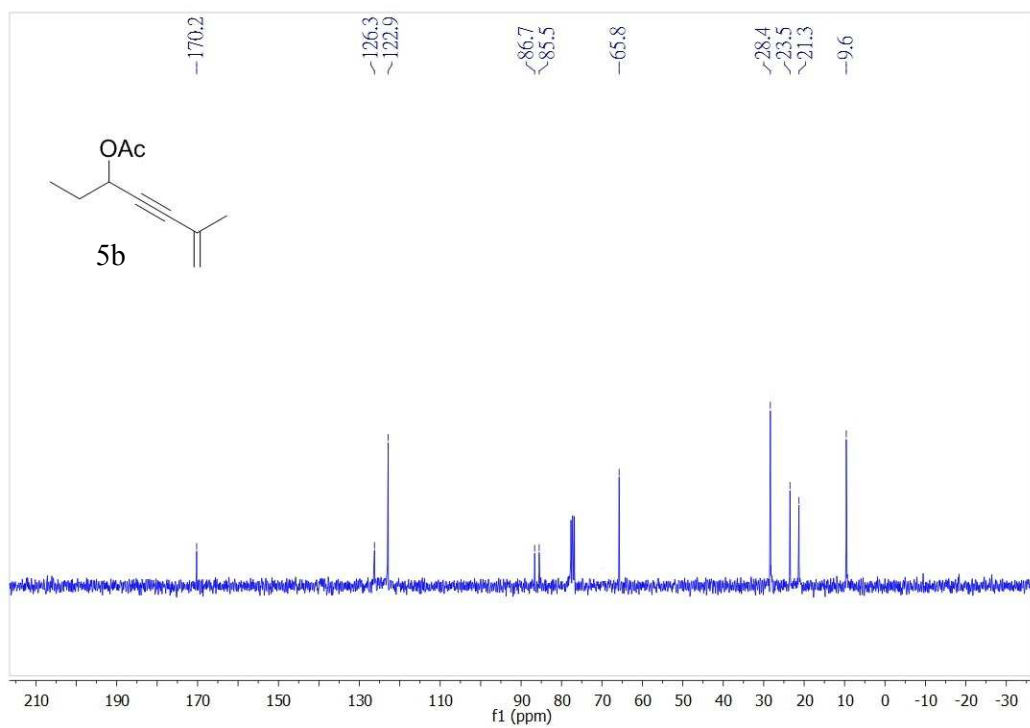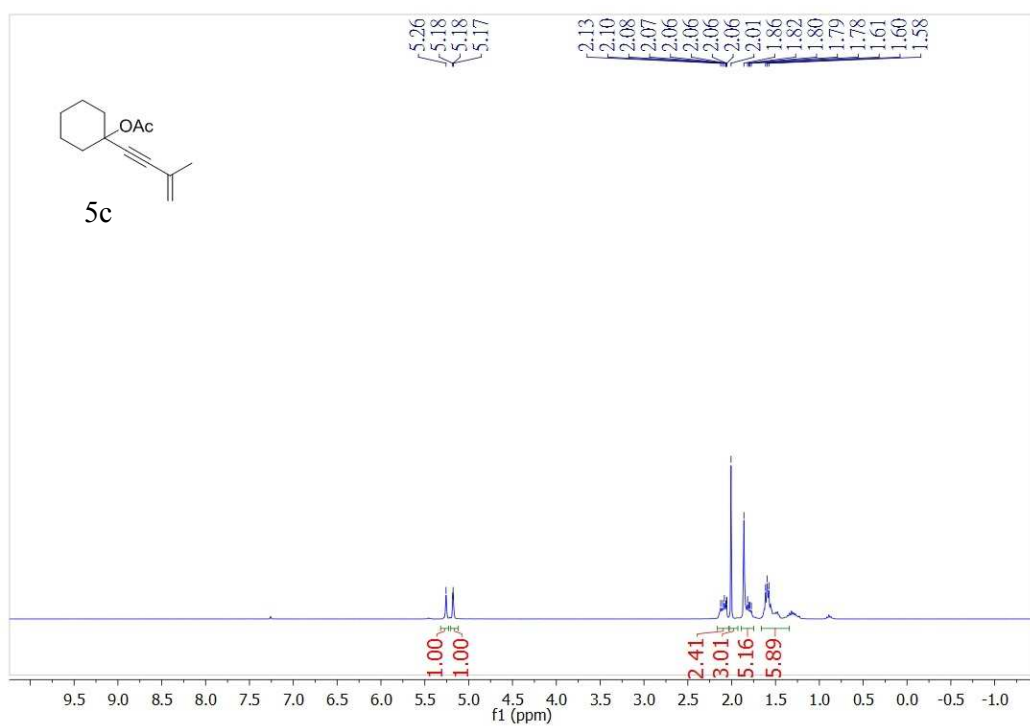

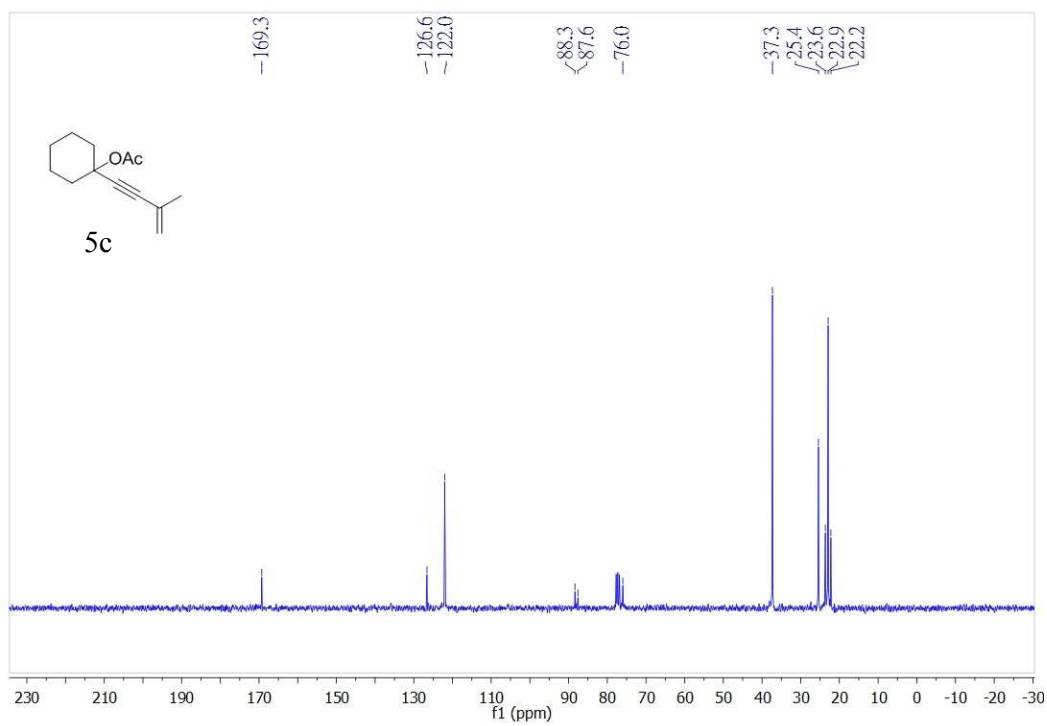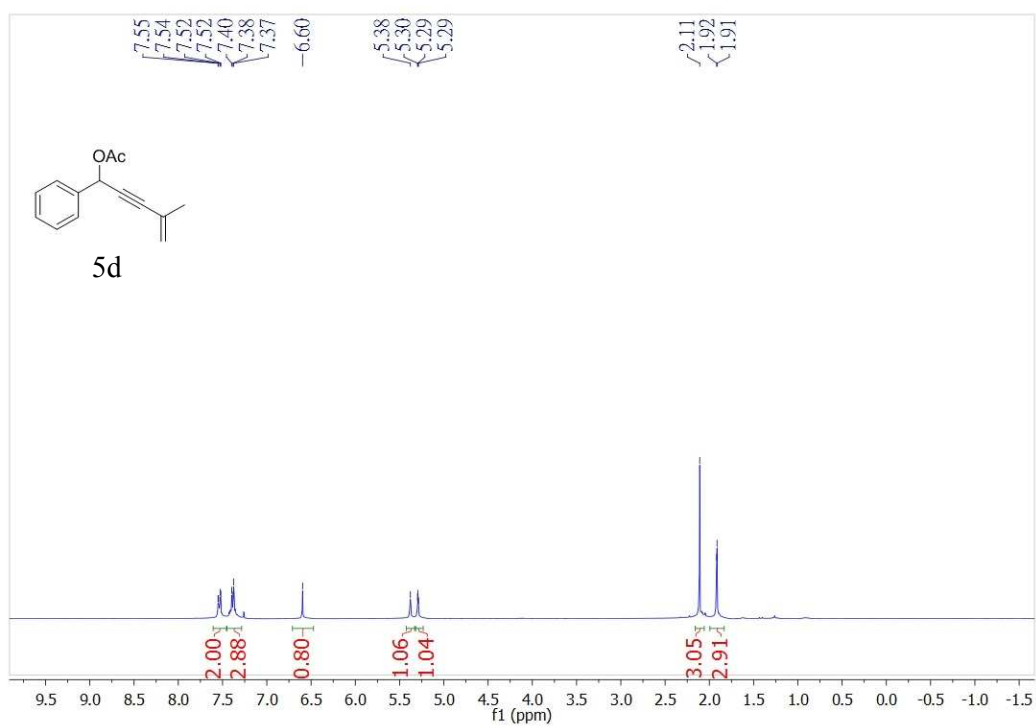

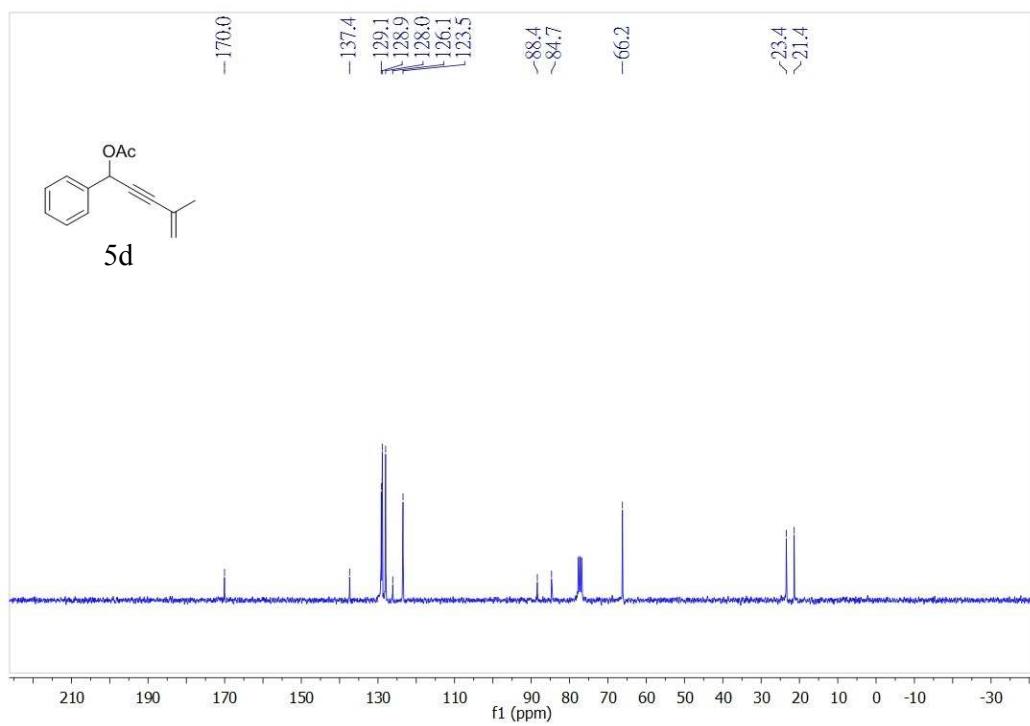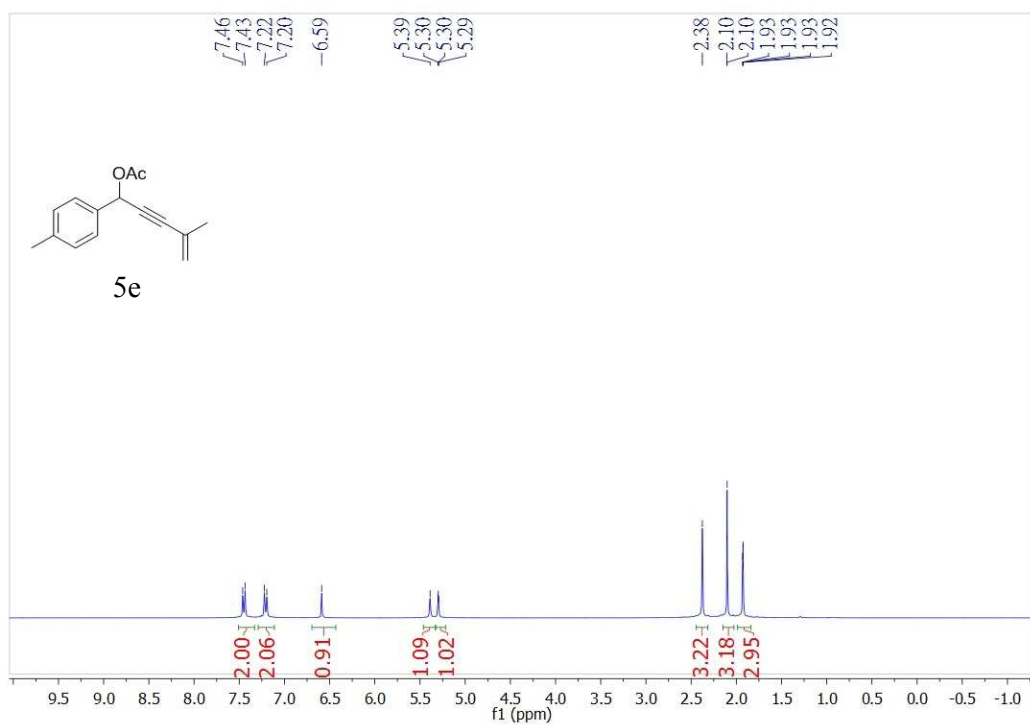

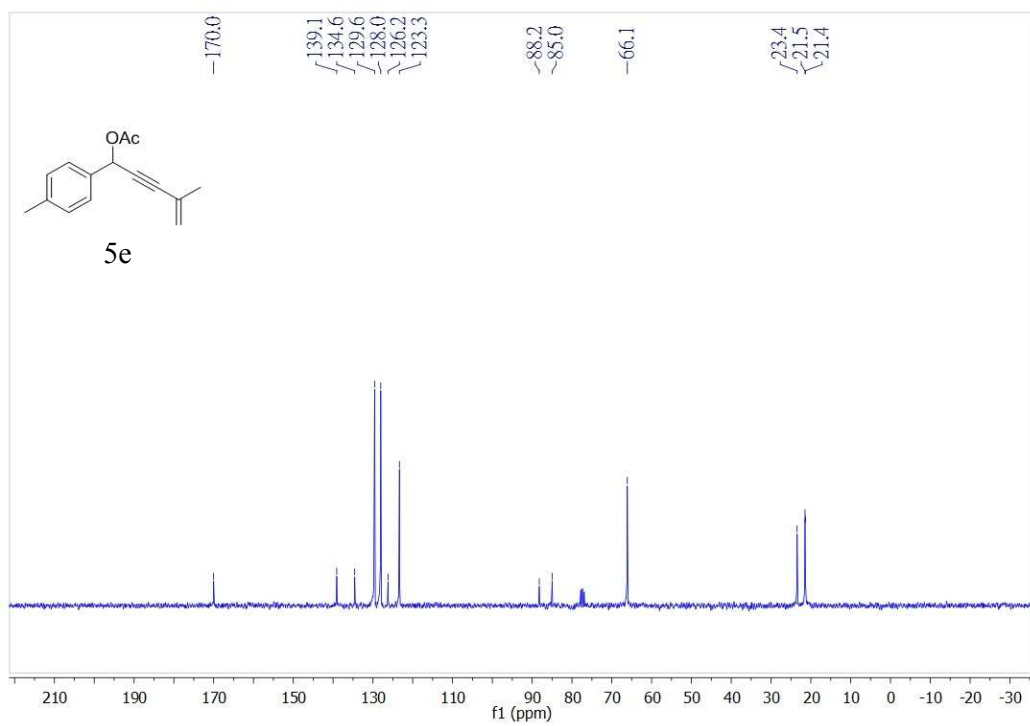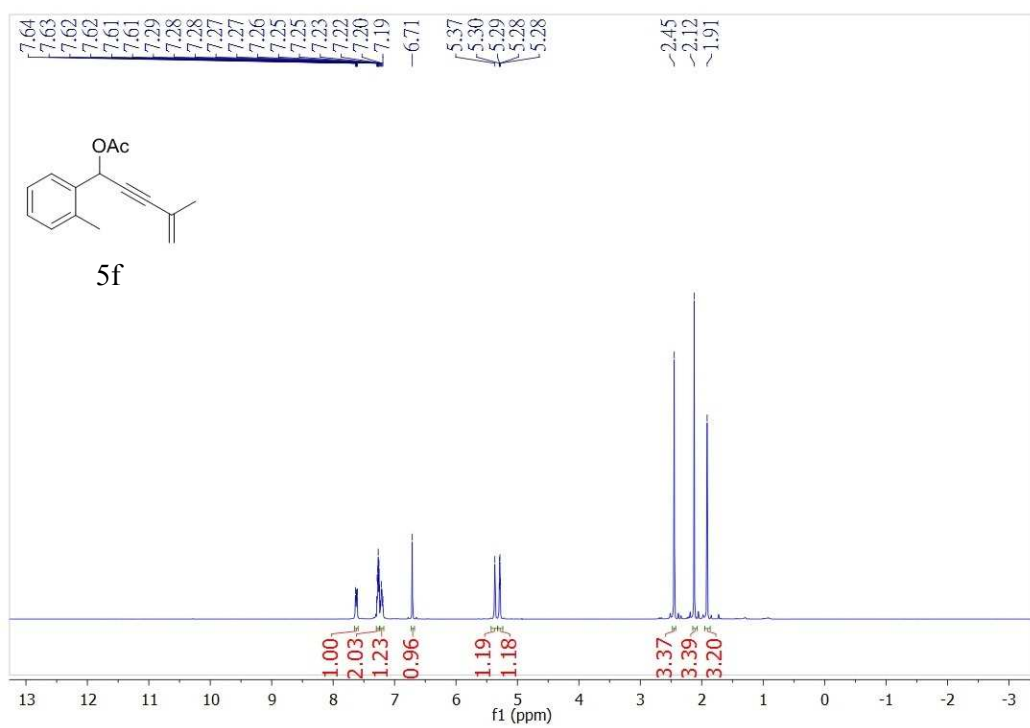



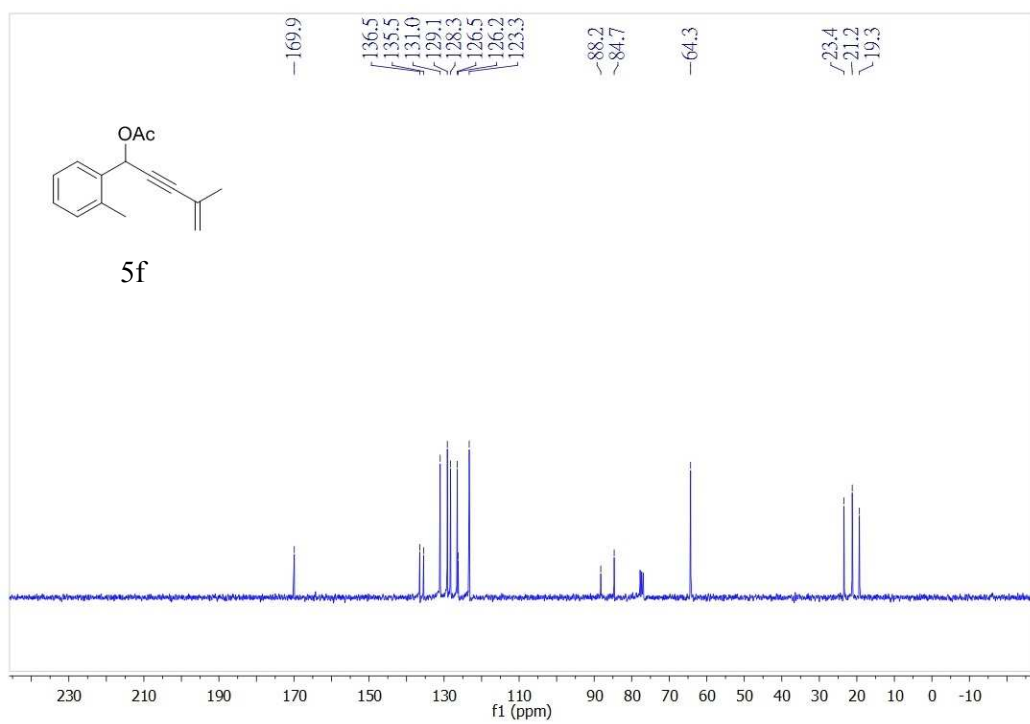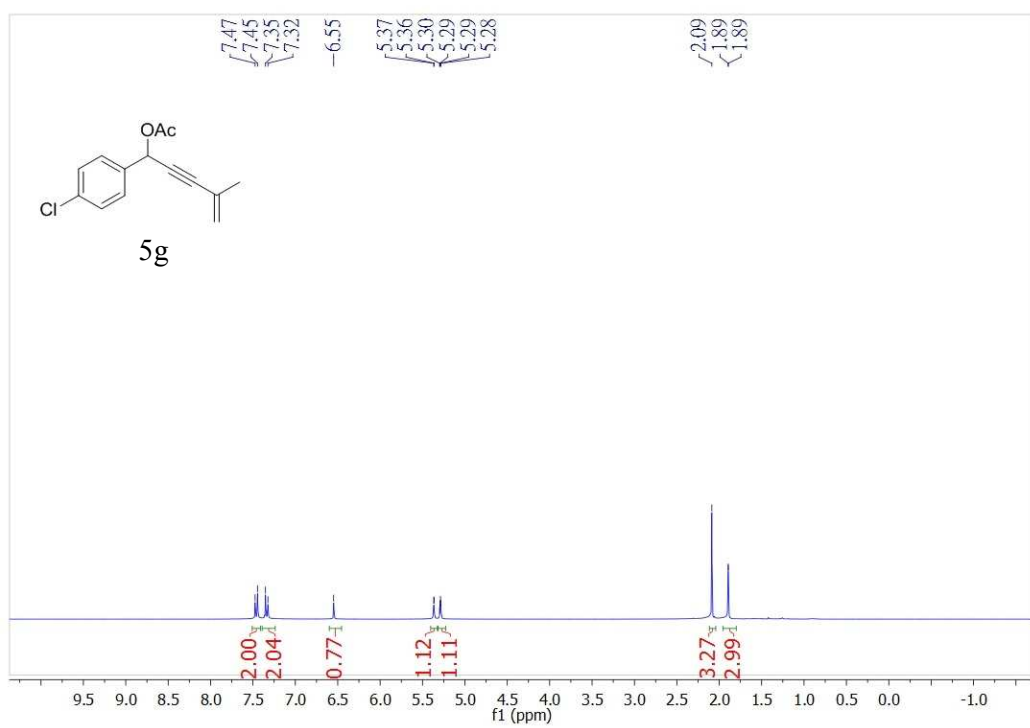

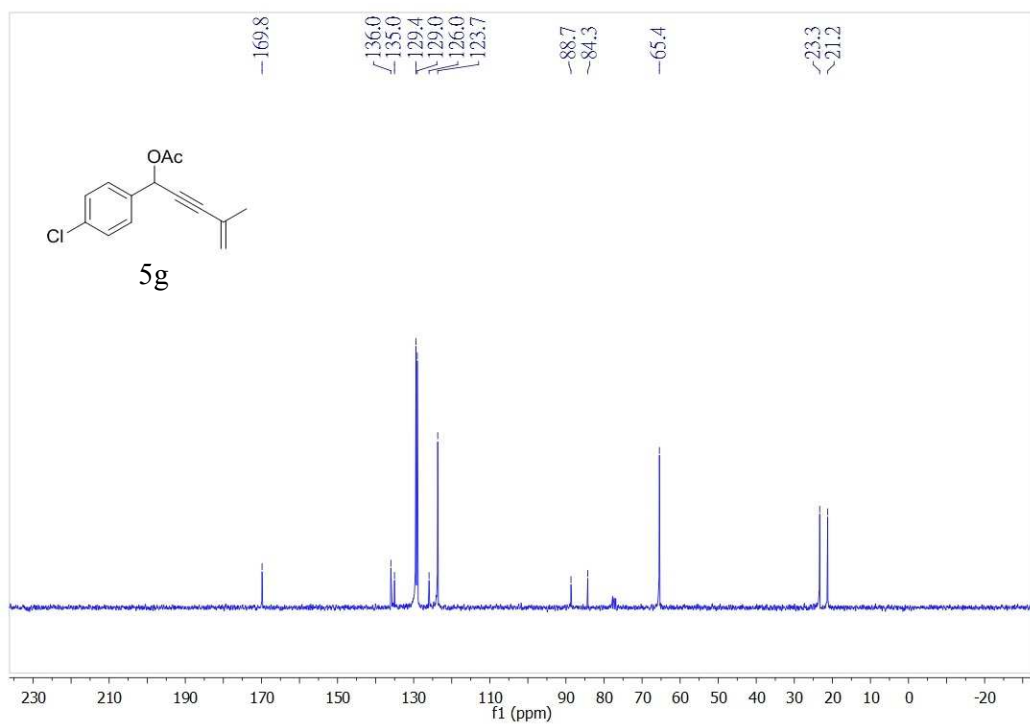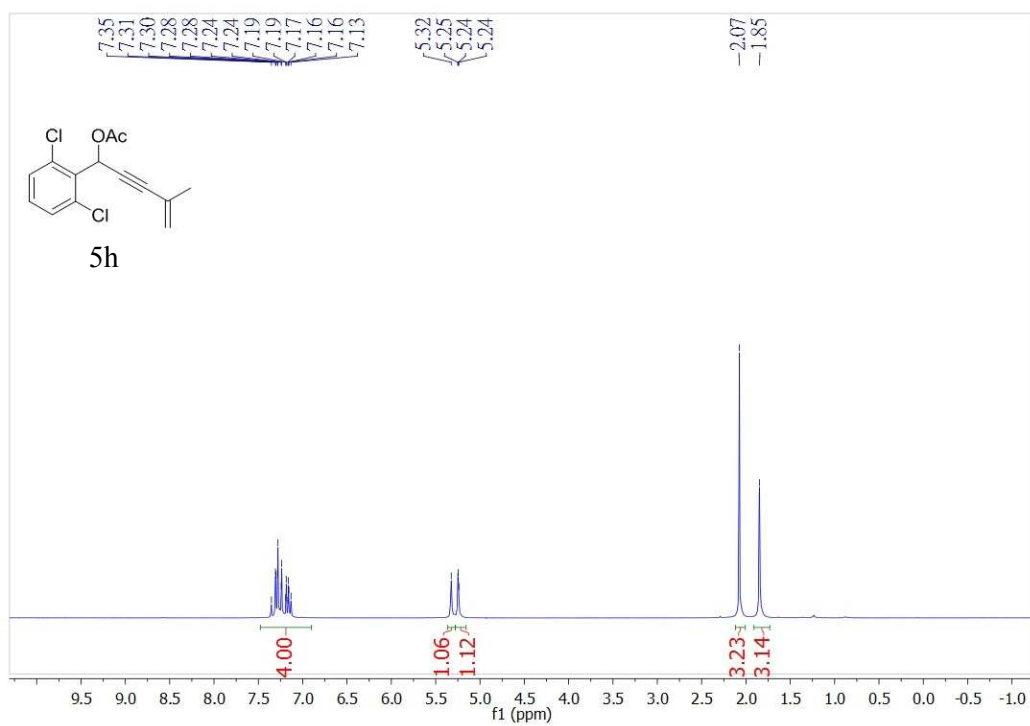

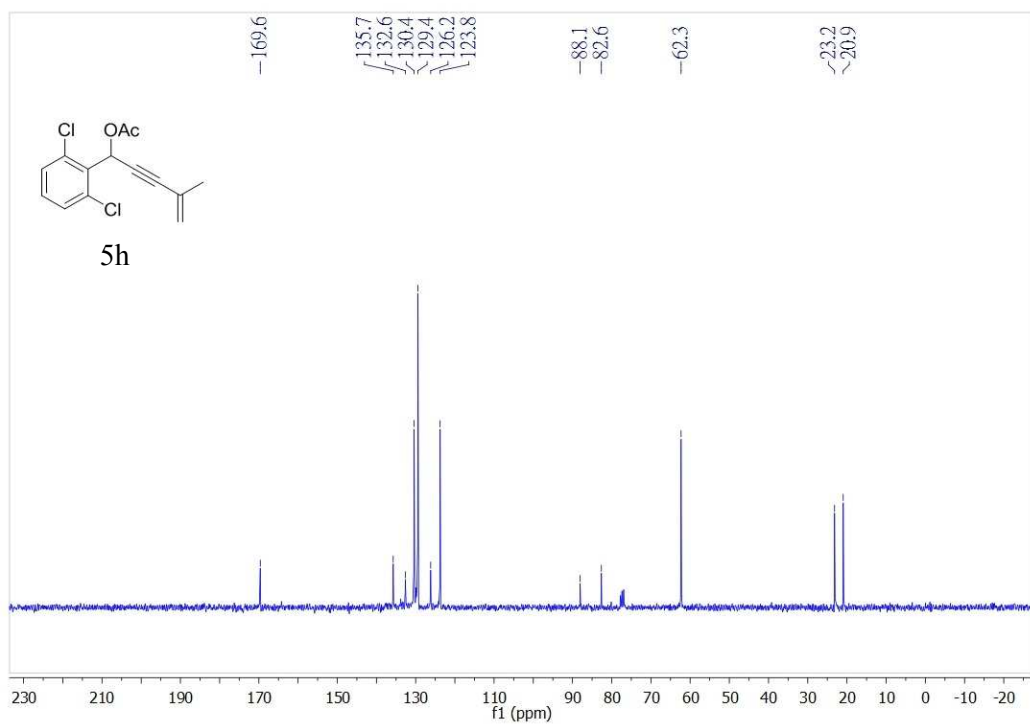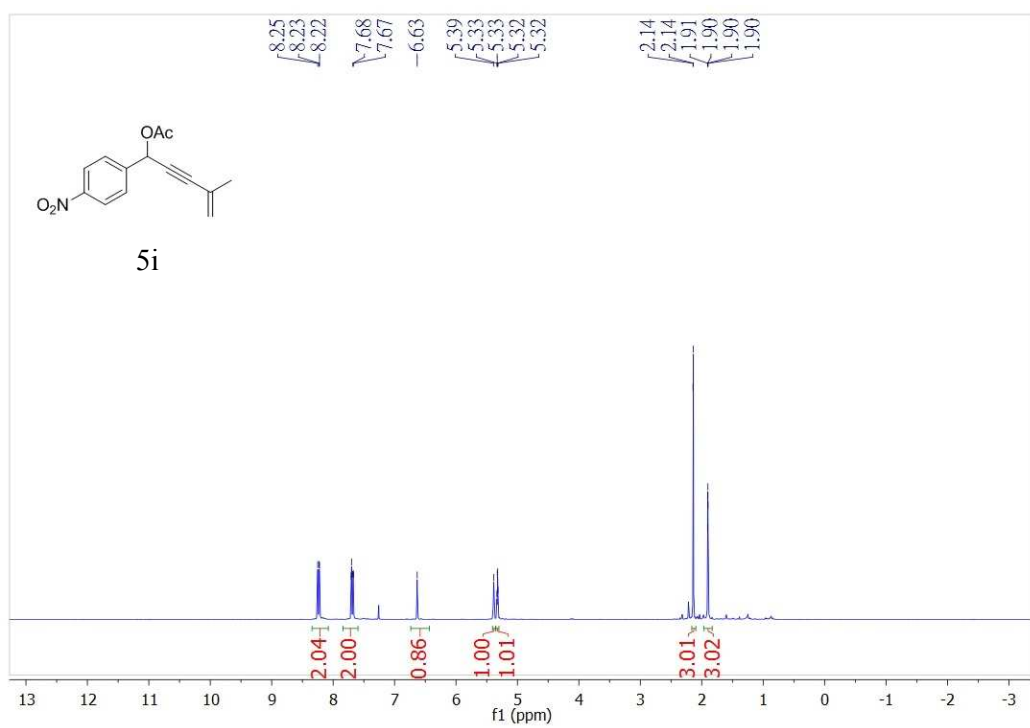

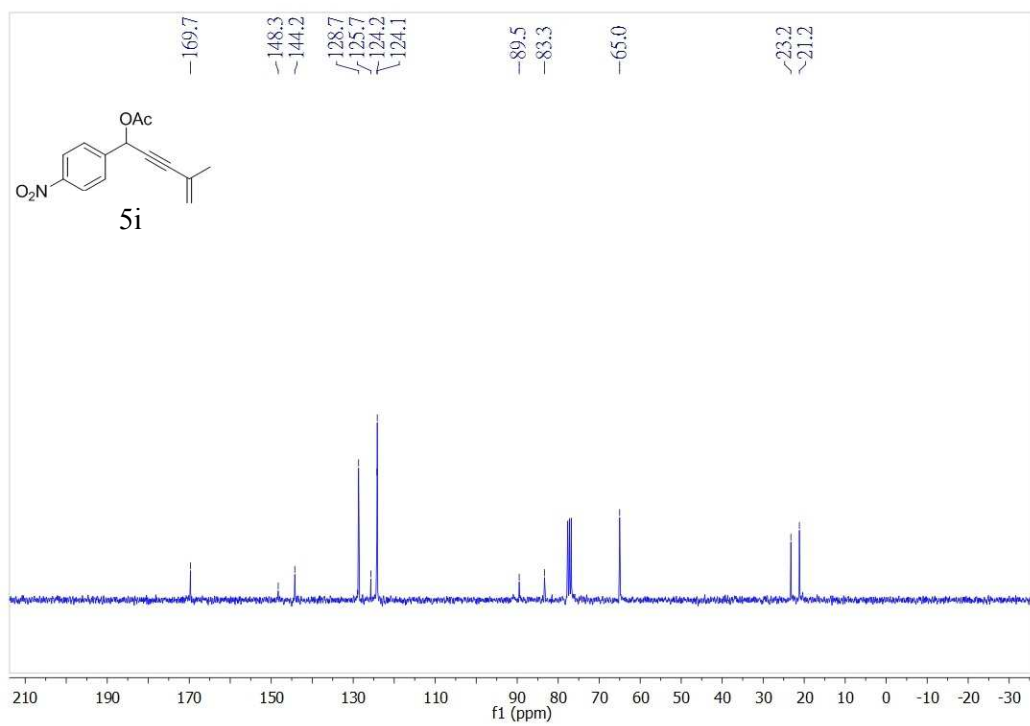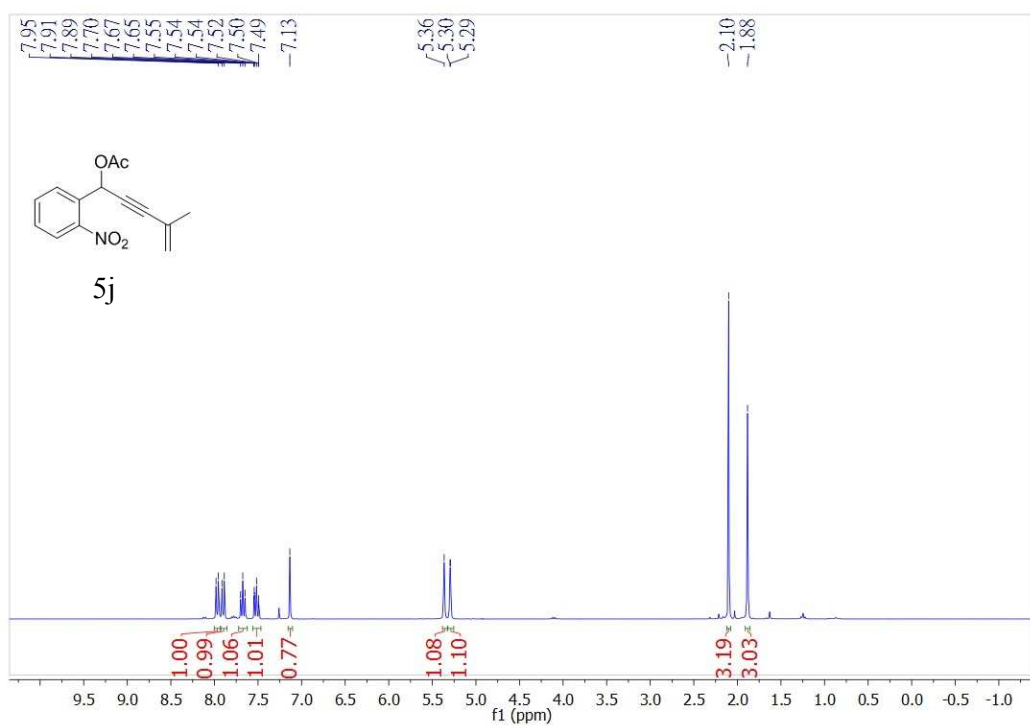

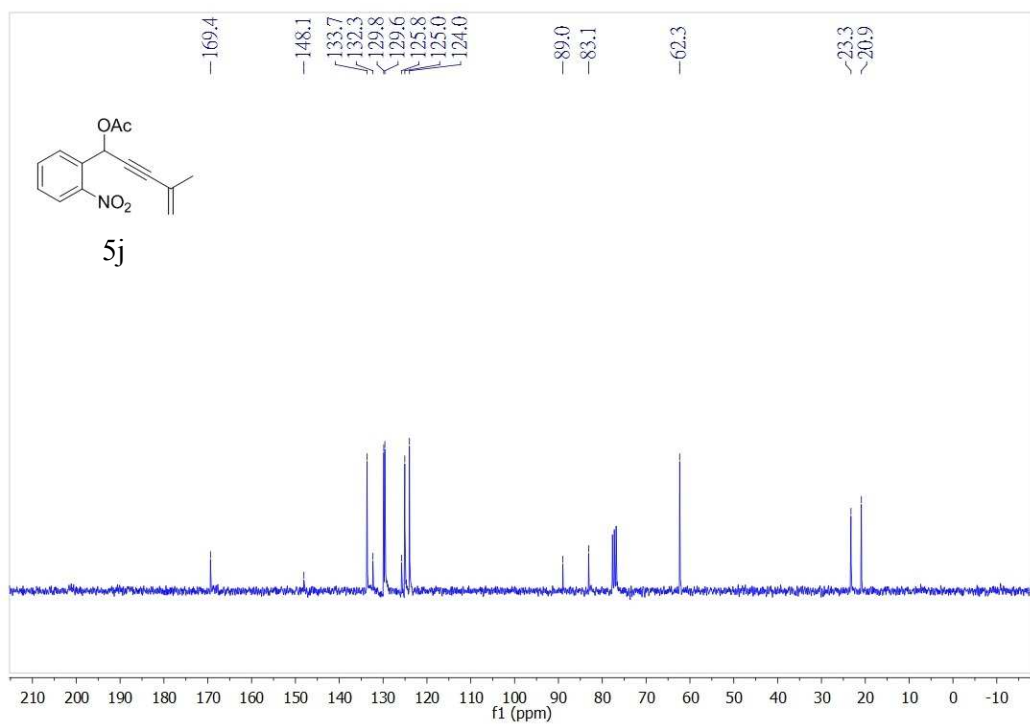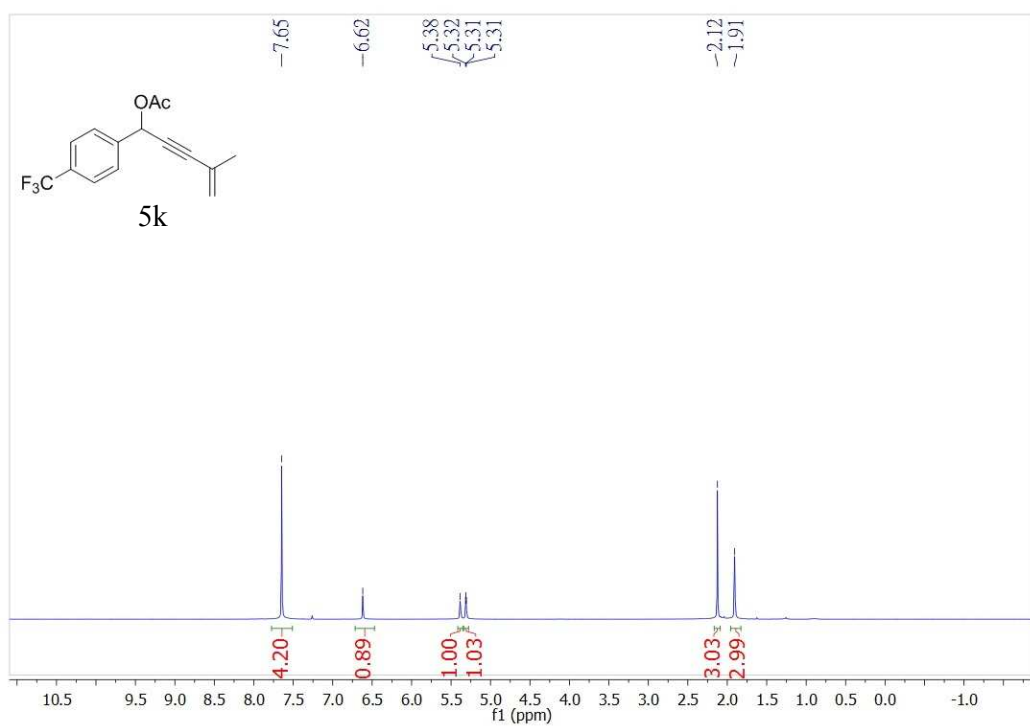

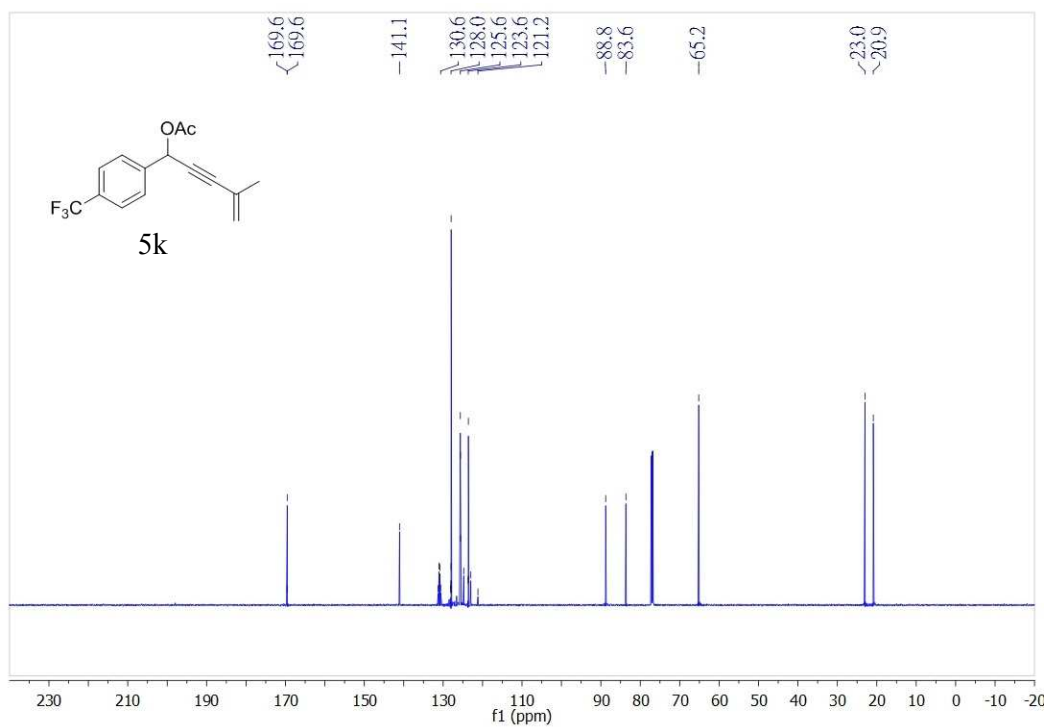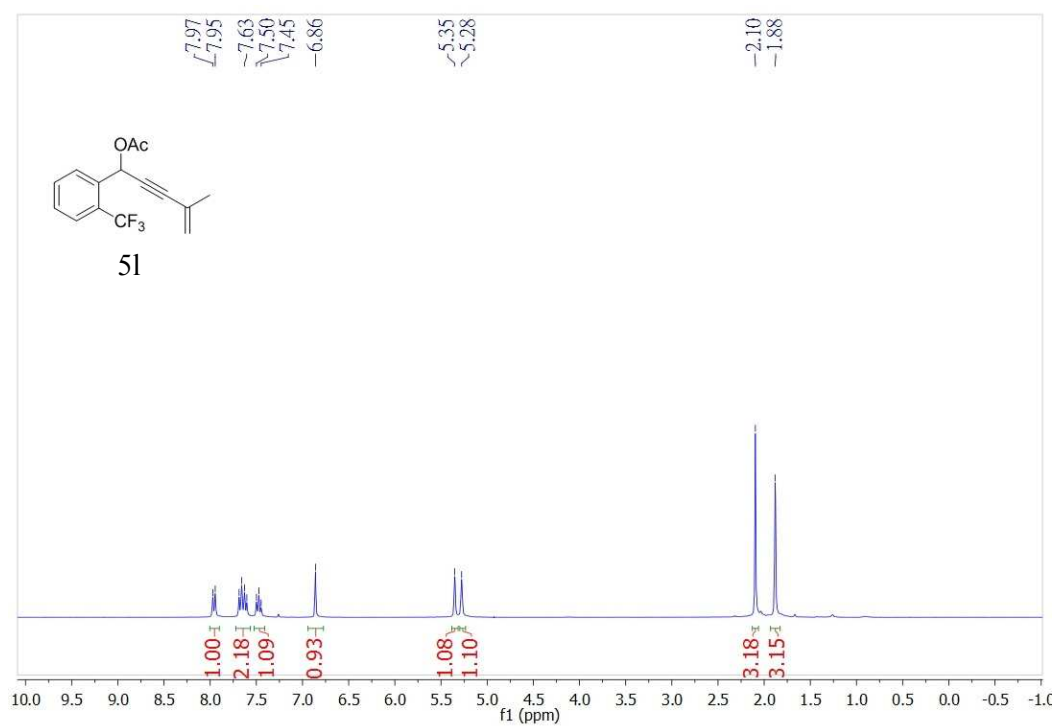

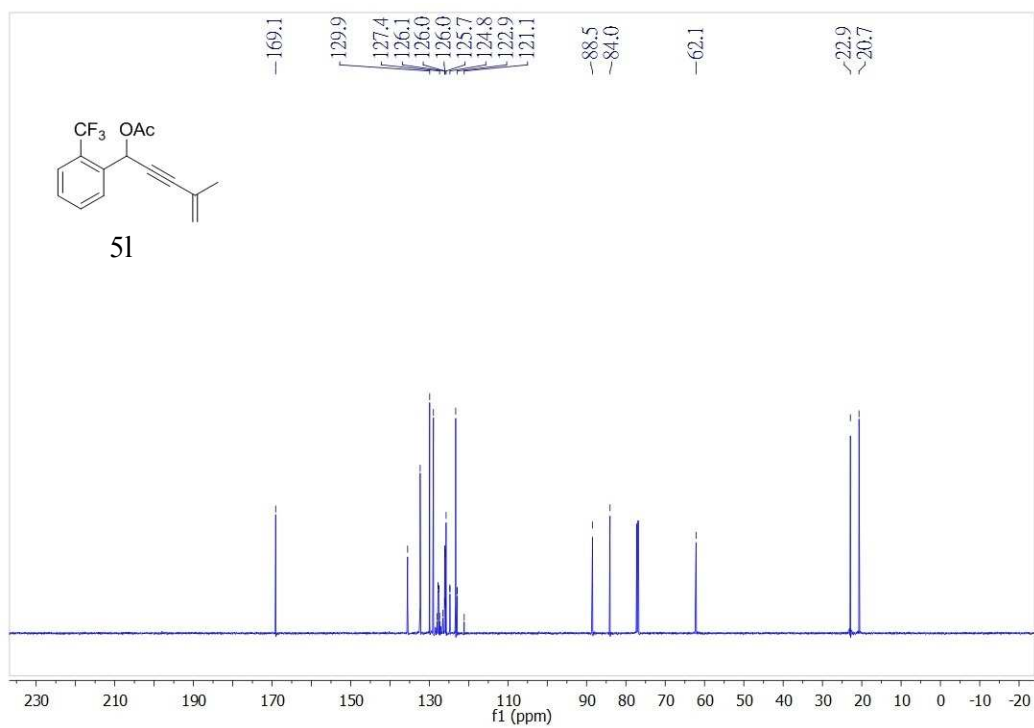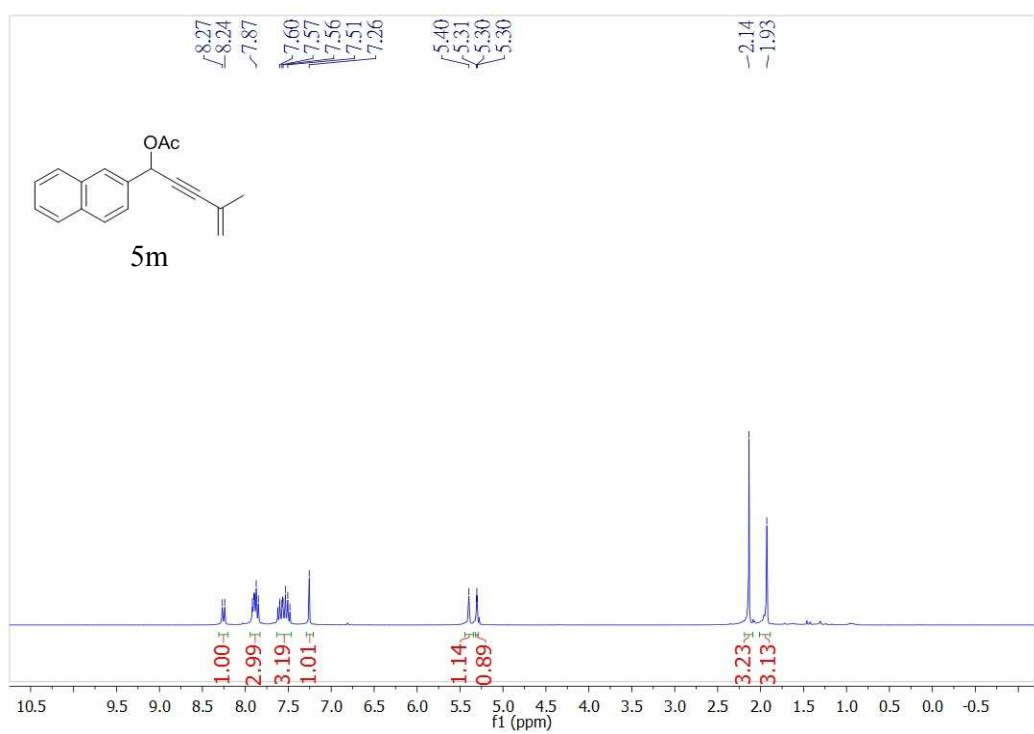

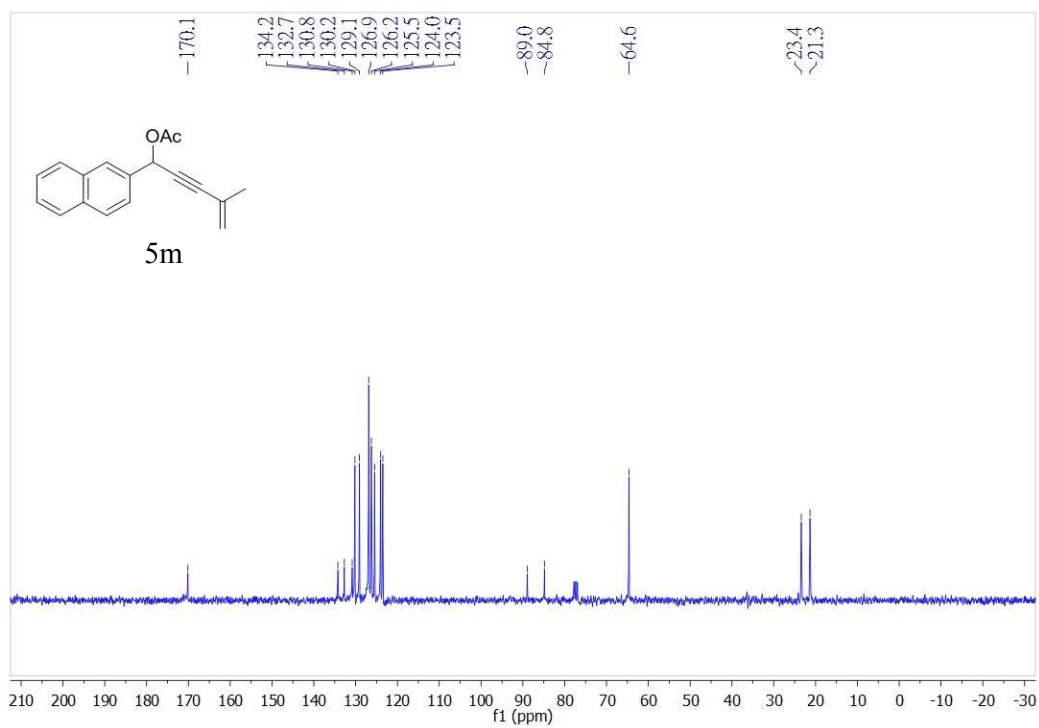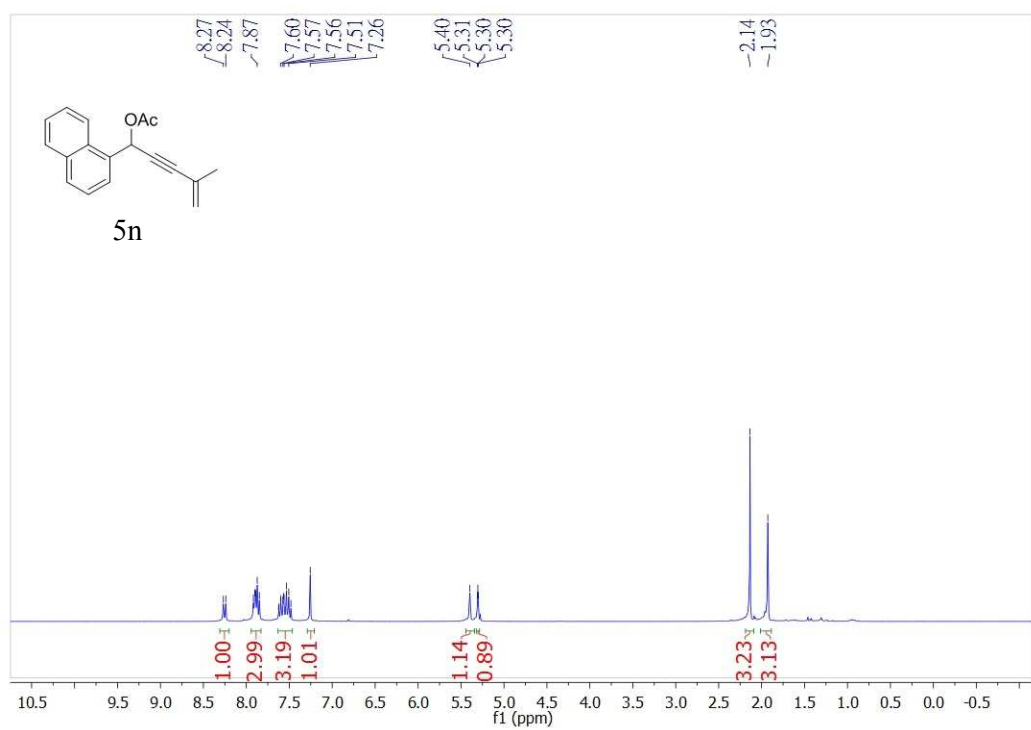



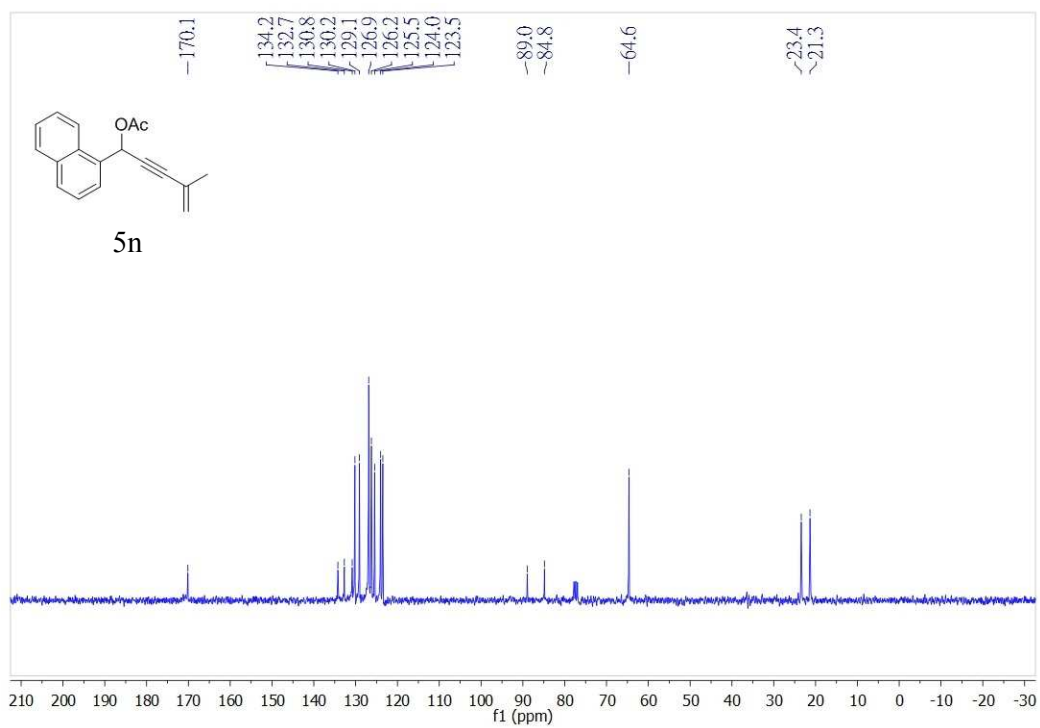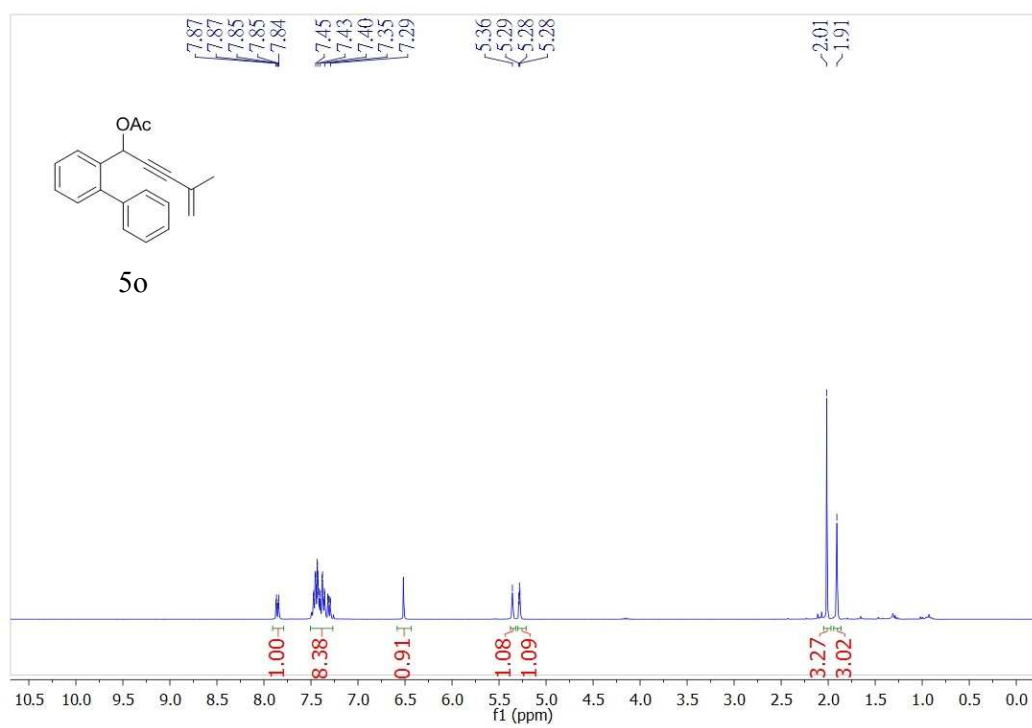

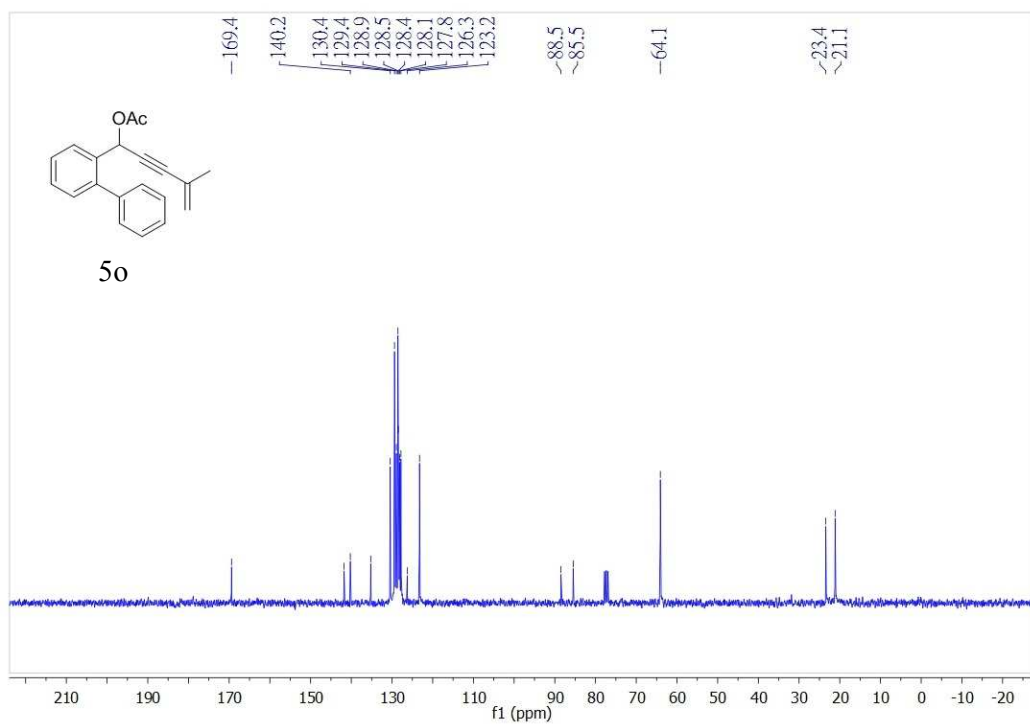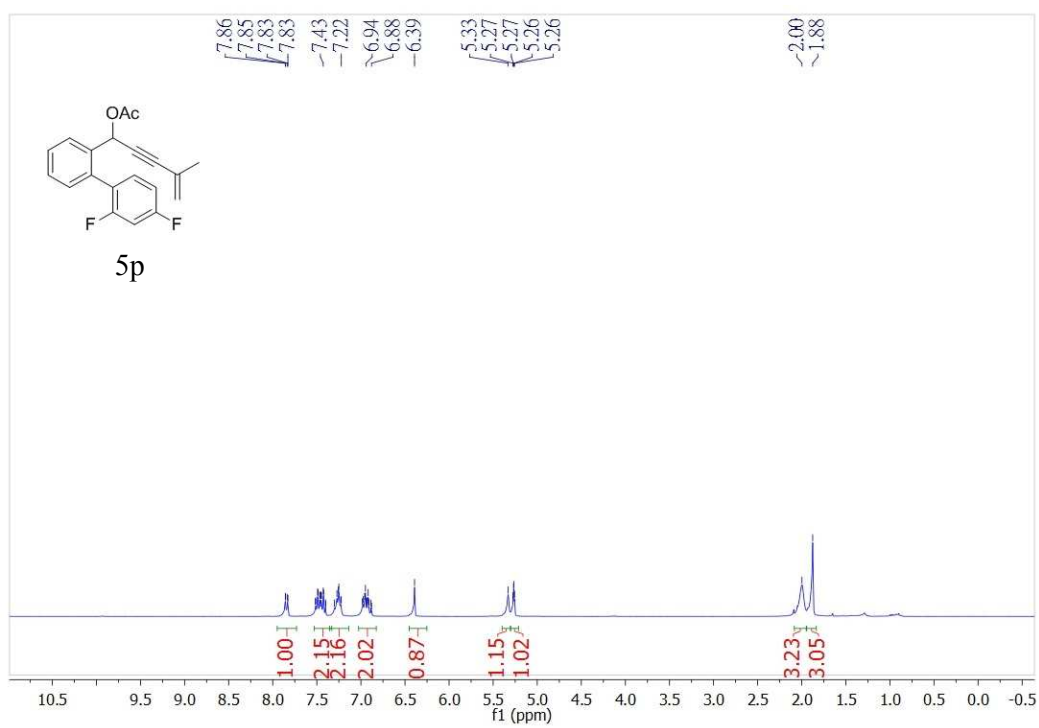

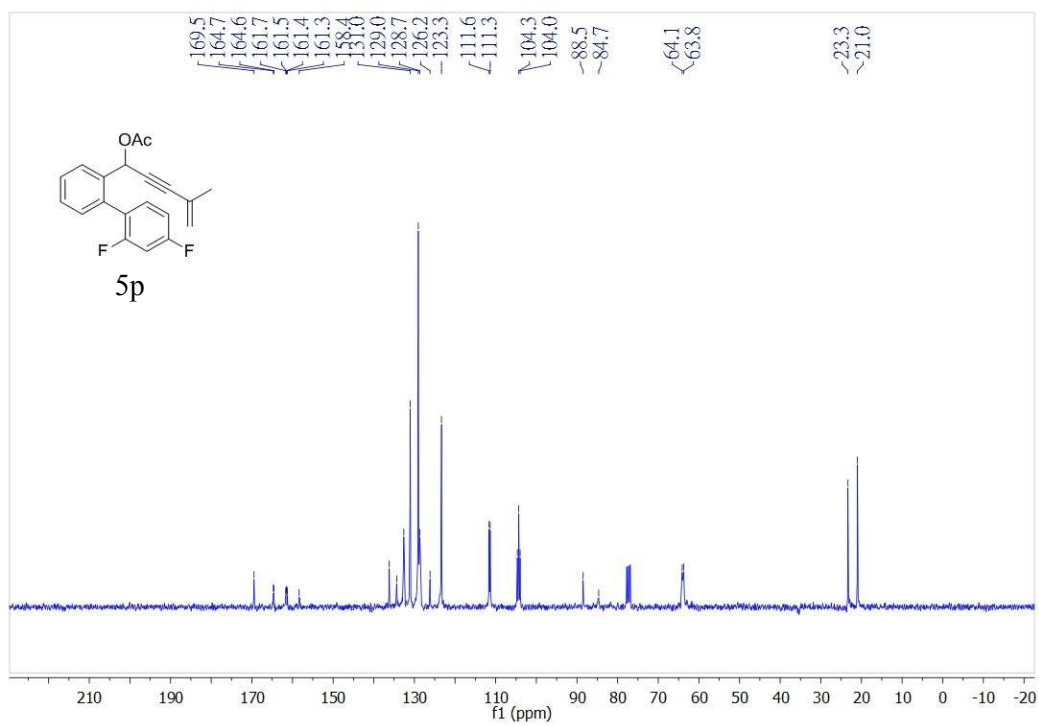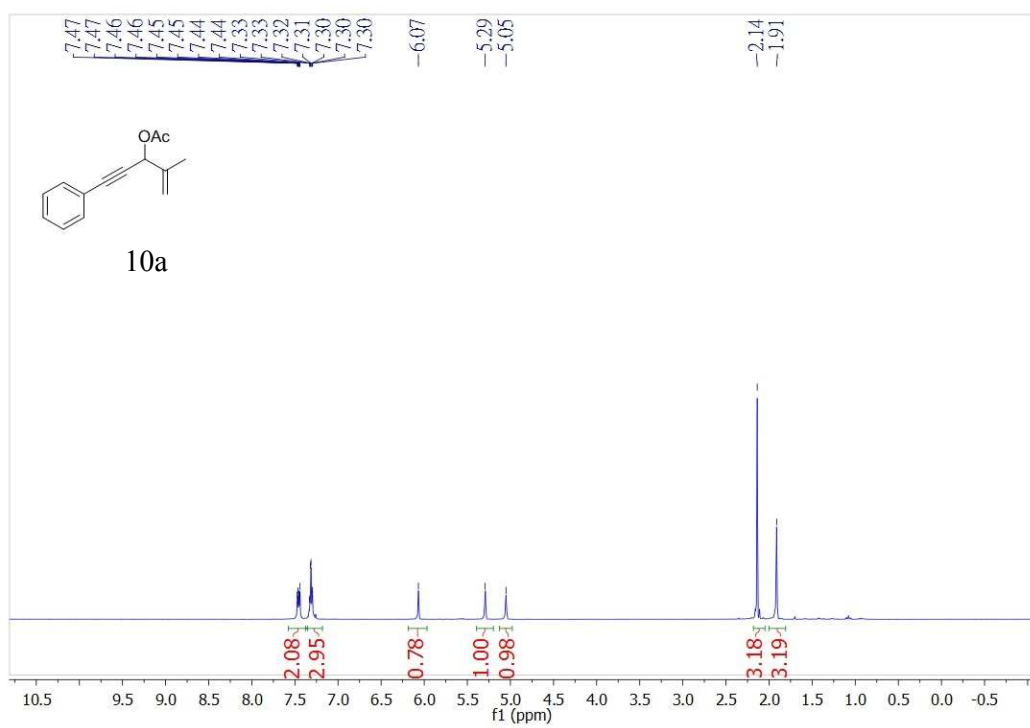

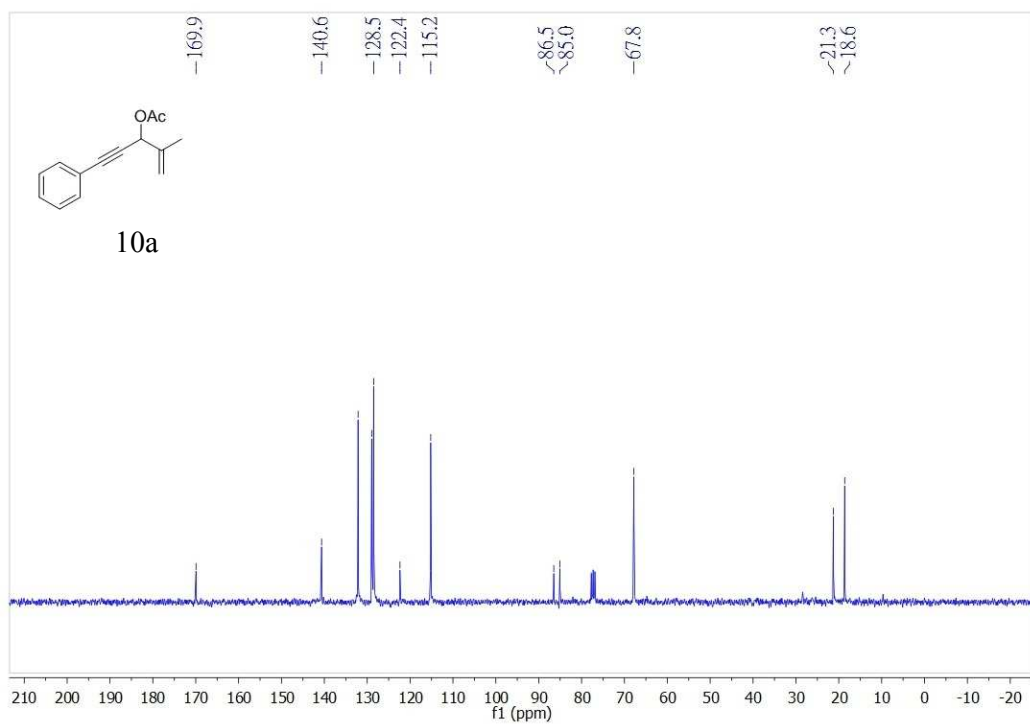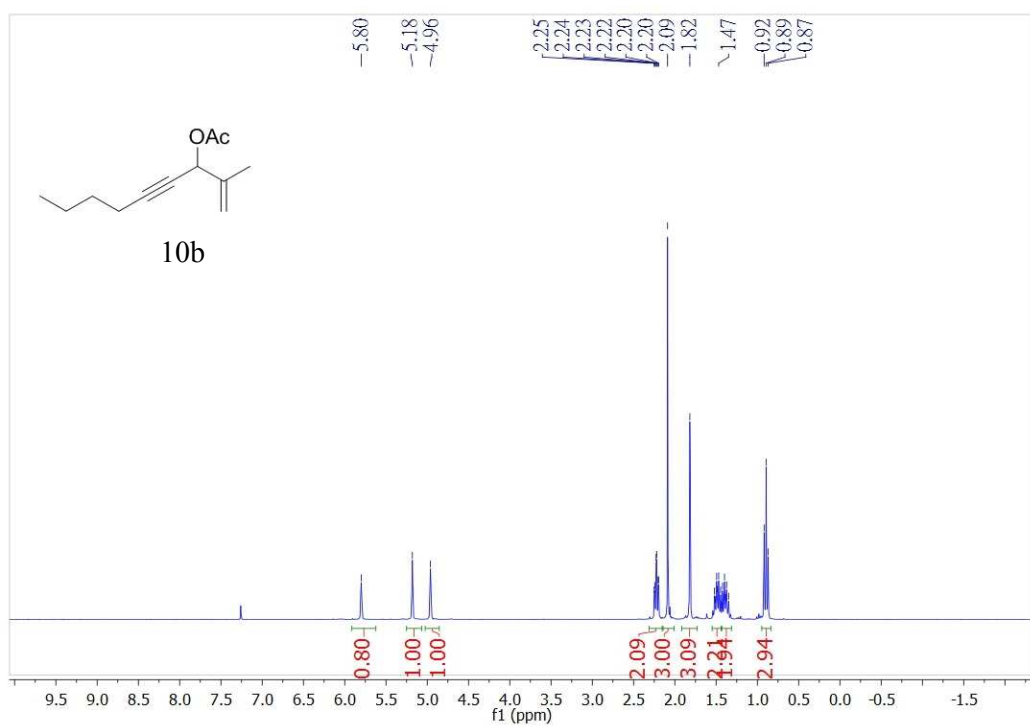

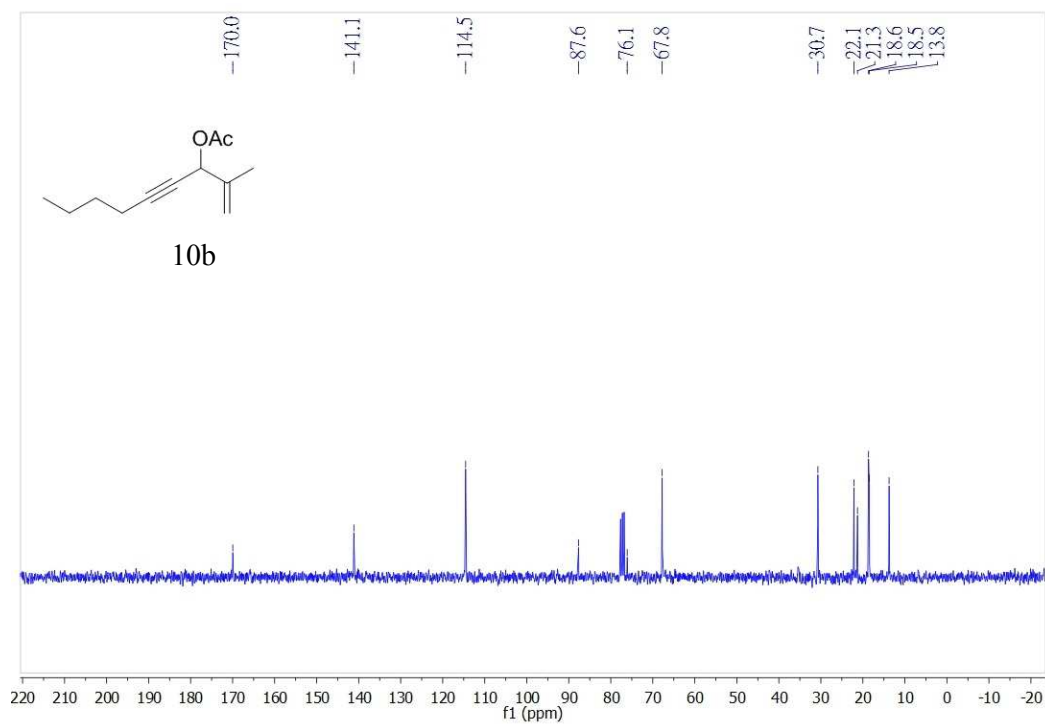

#### 4. [4+1] cycloaddition products **4** & **6** & **11**

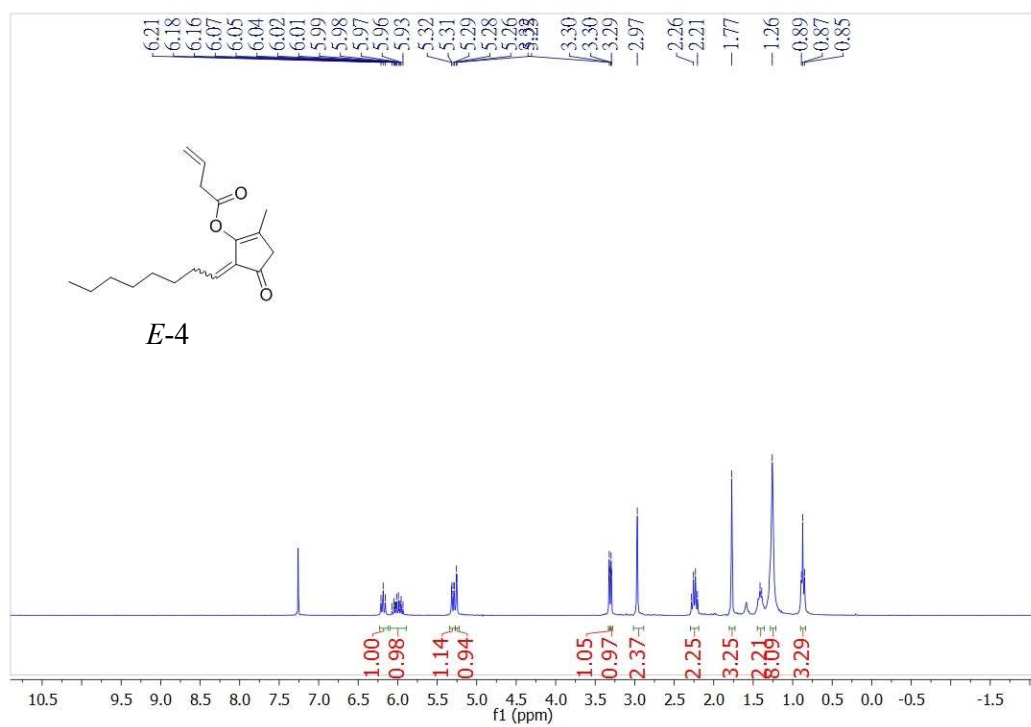

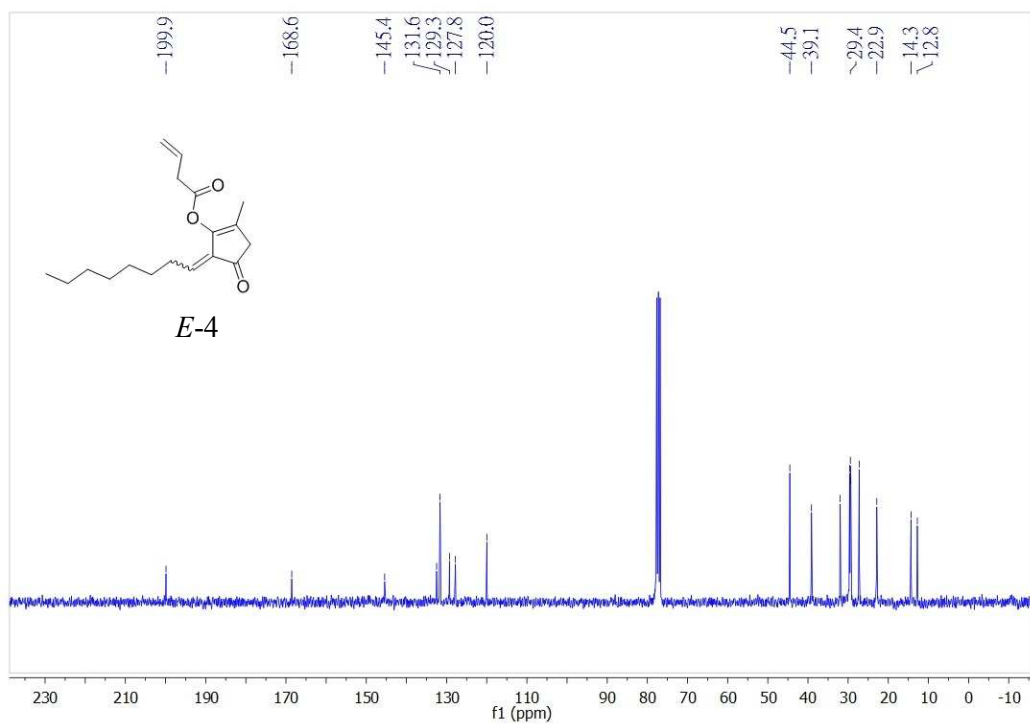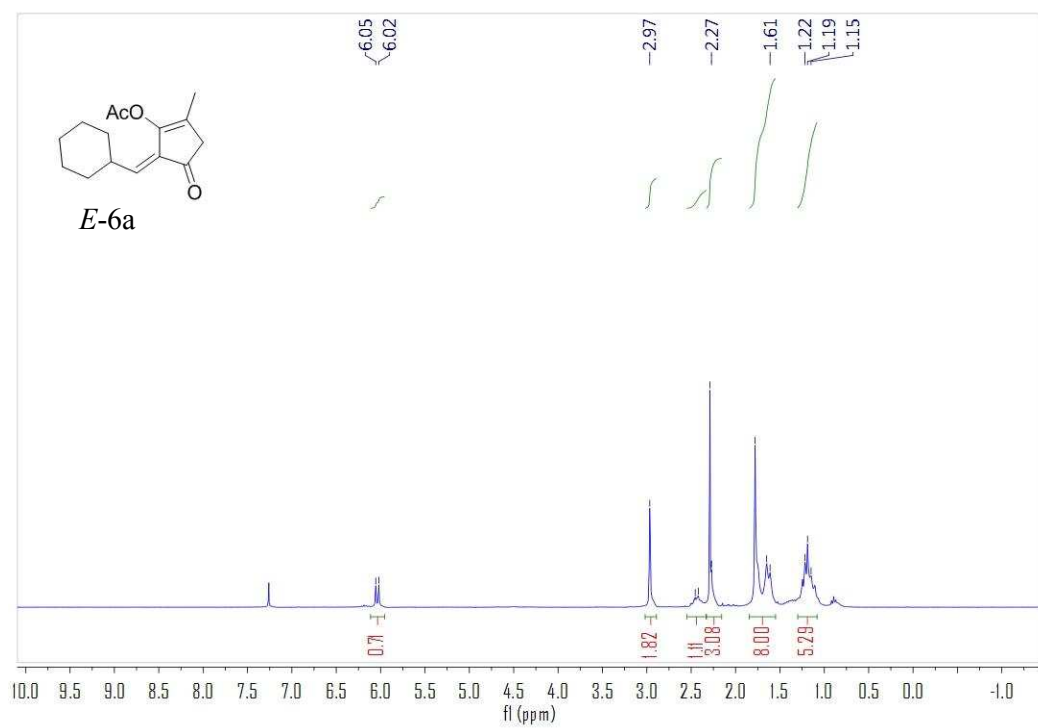

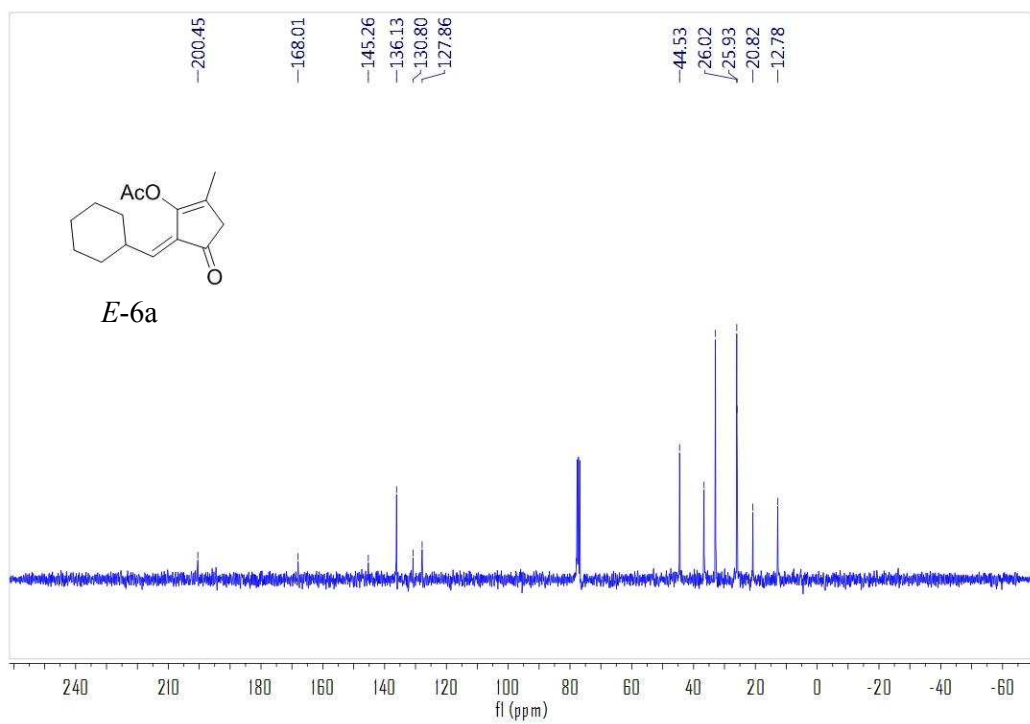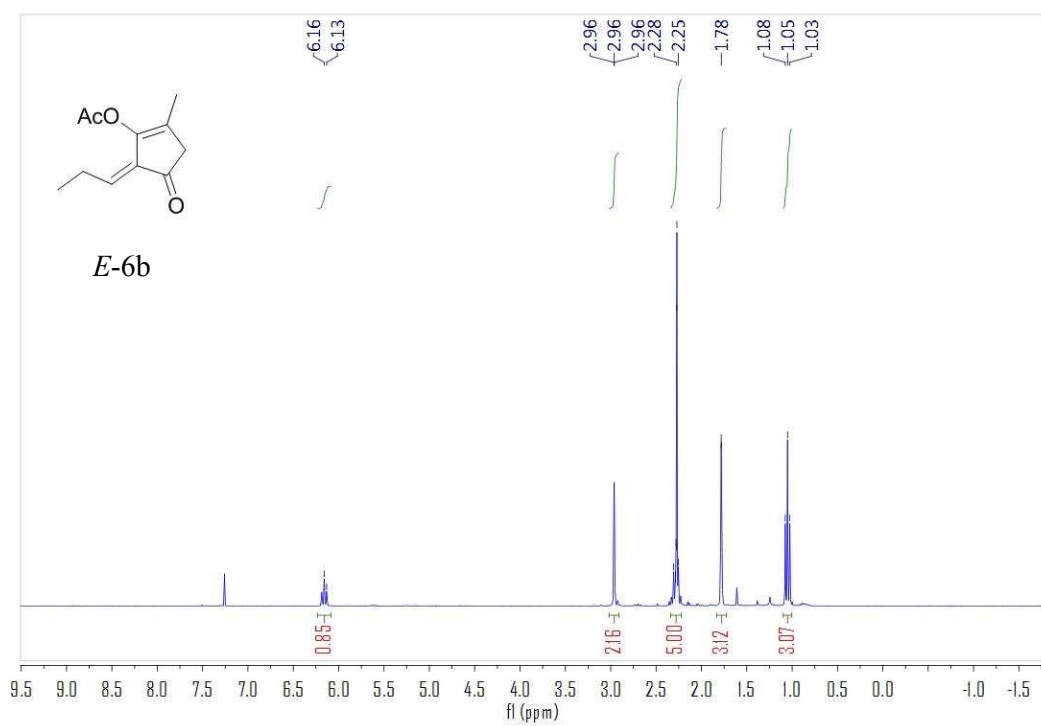

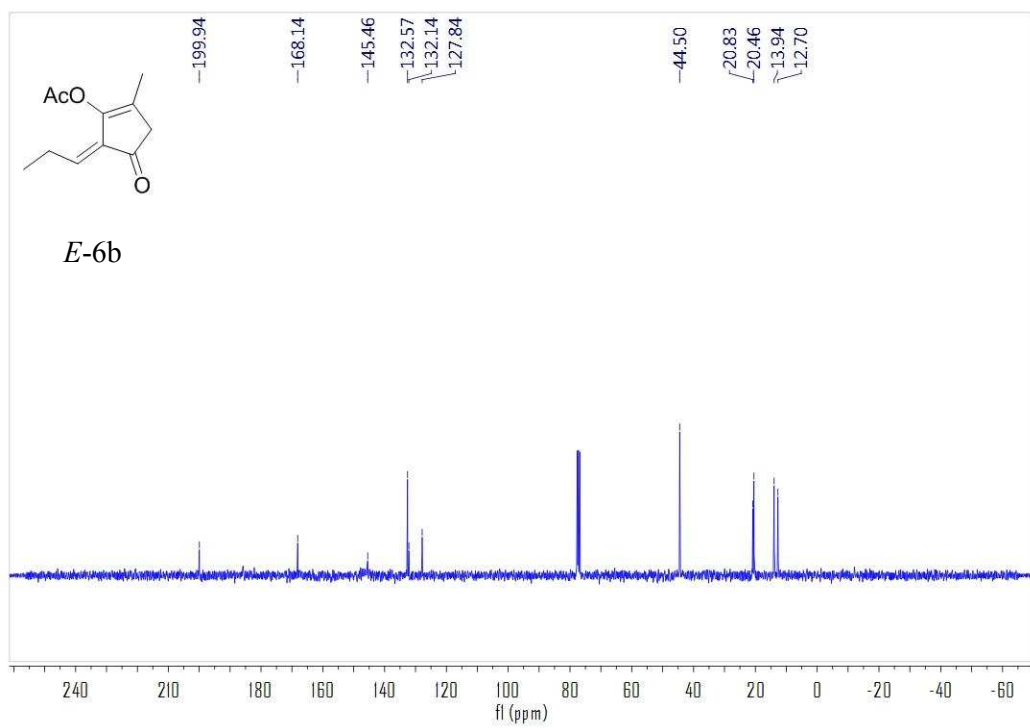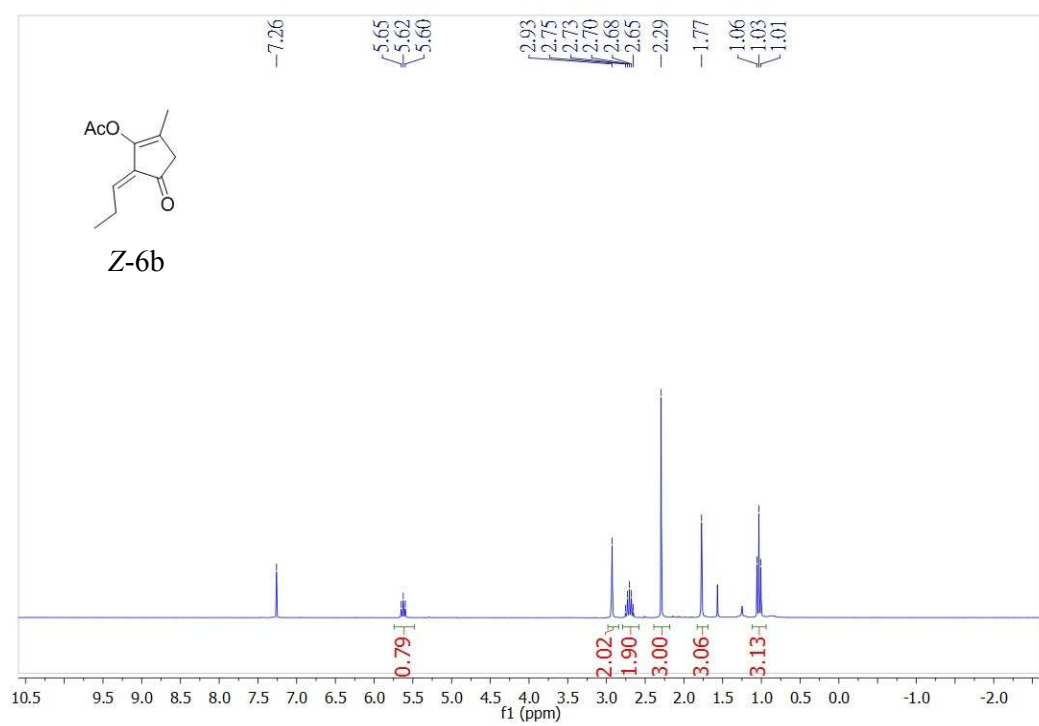



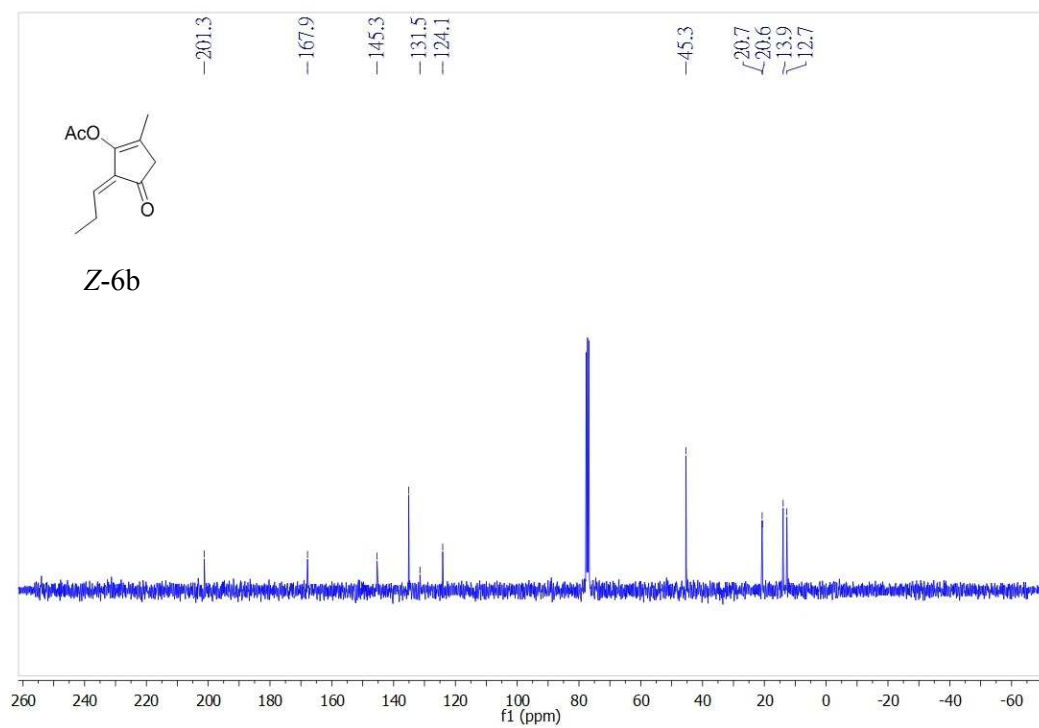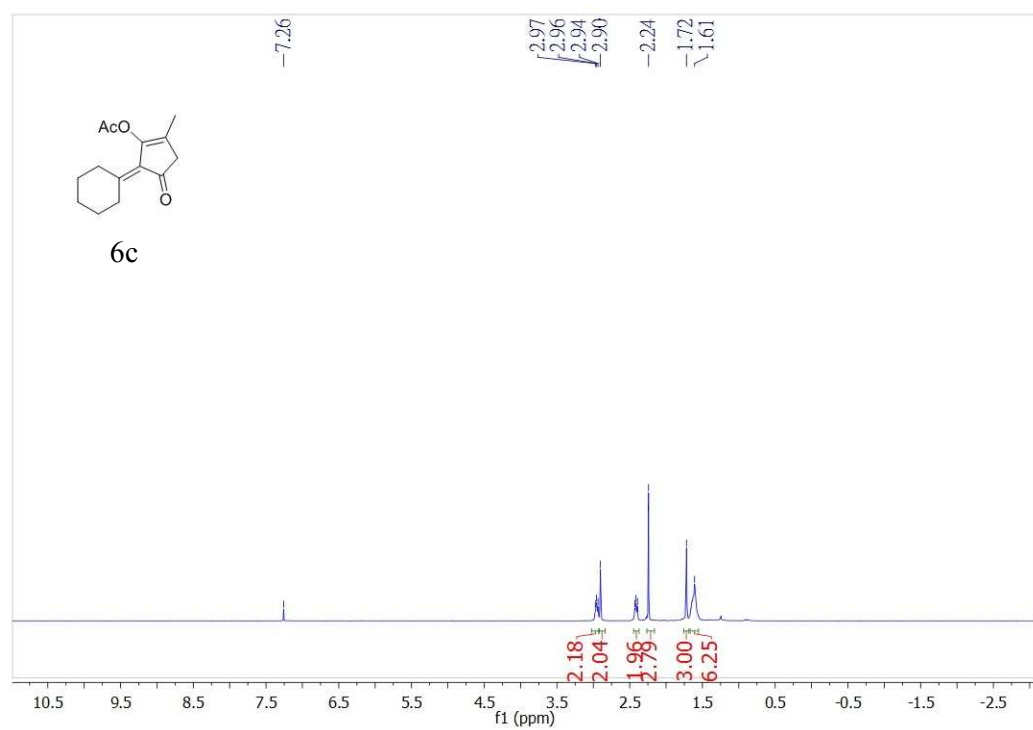

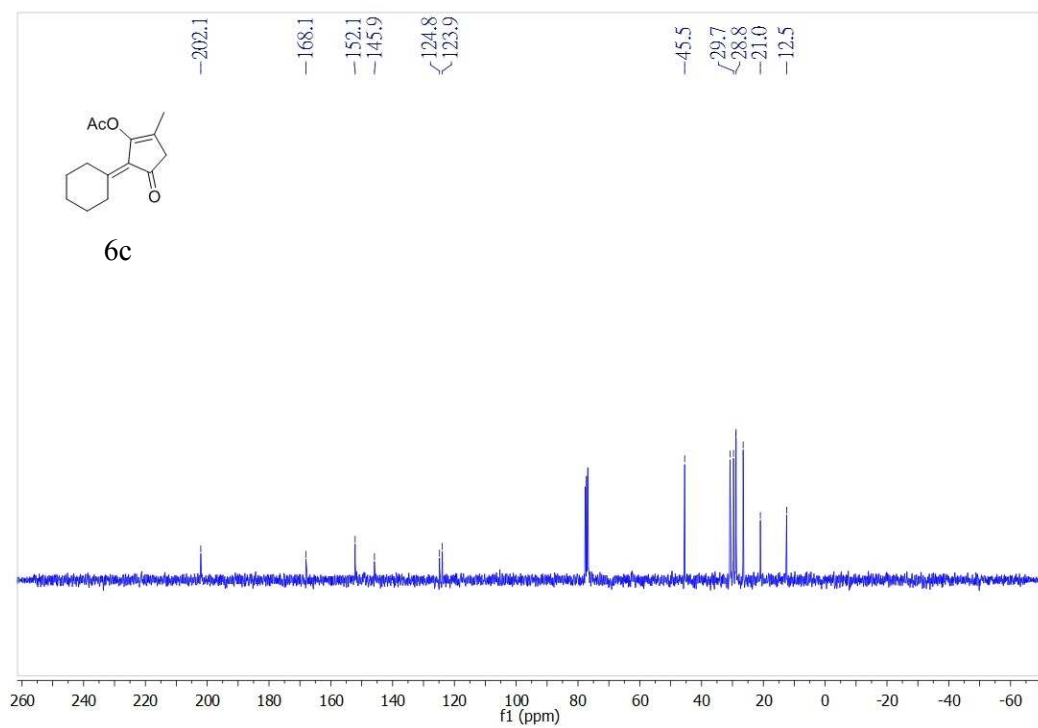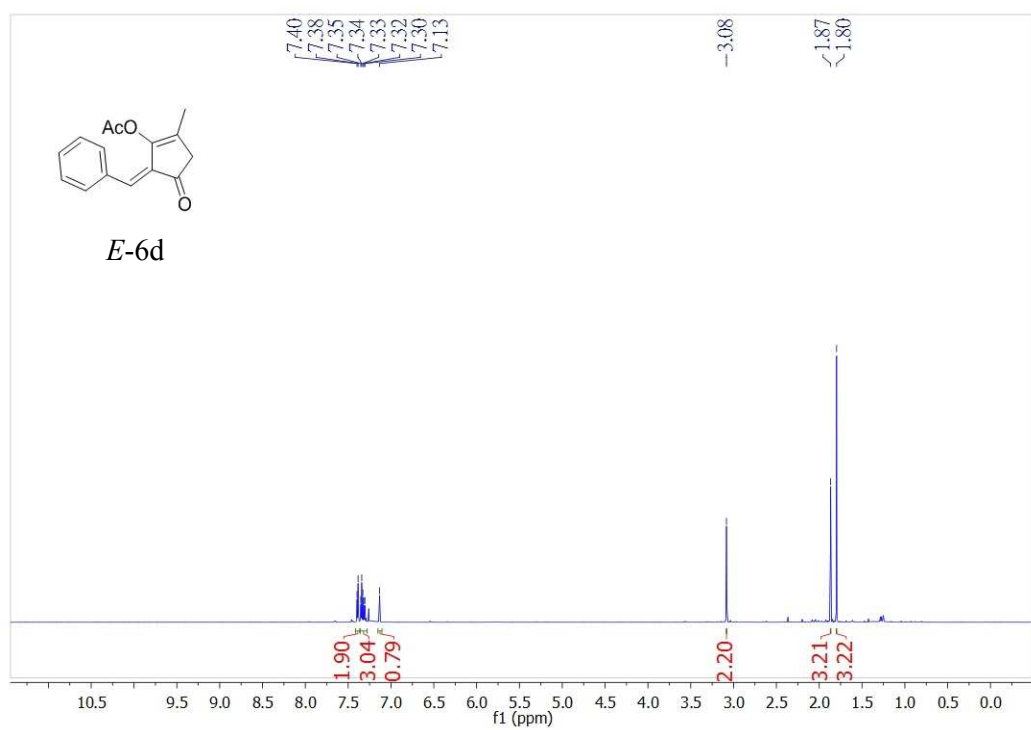

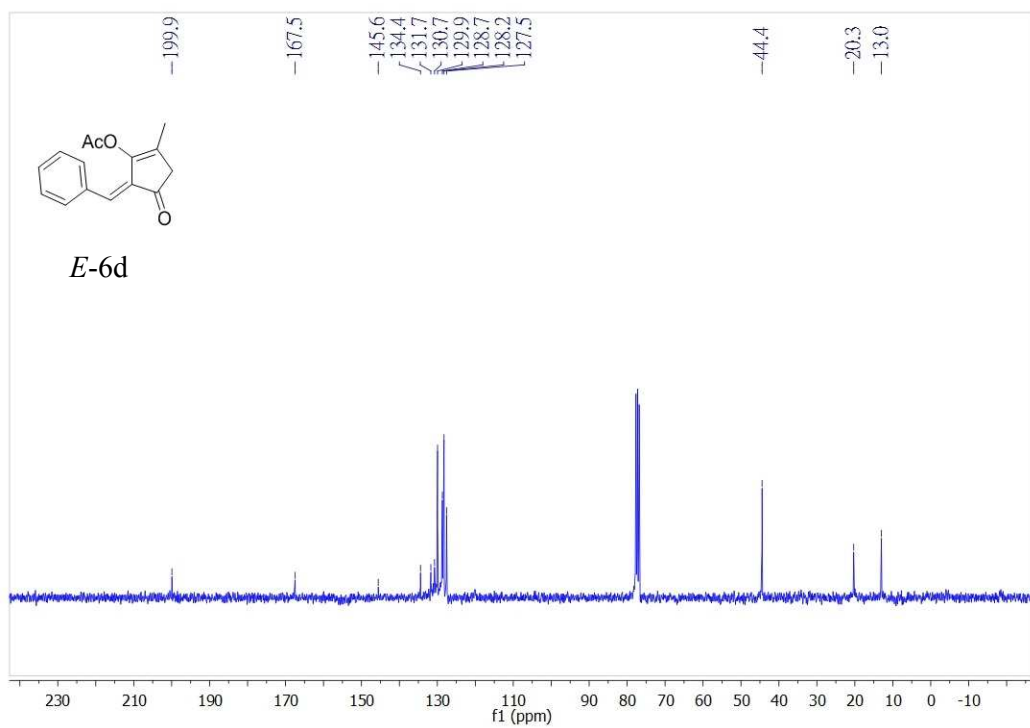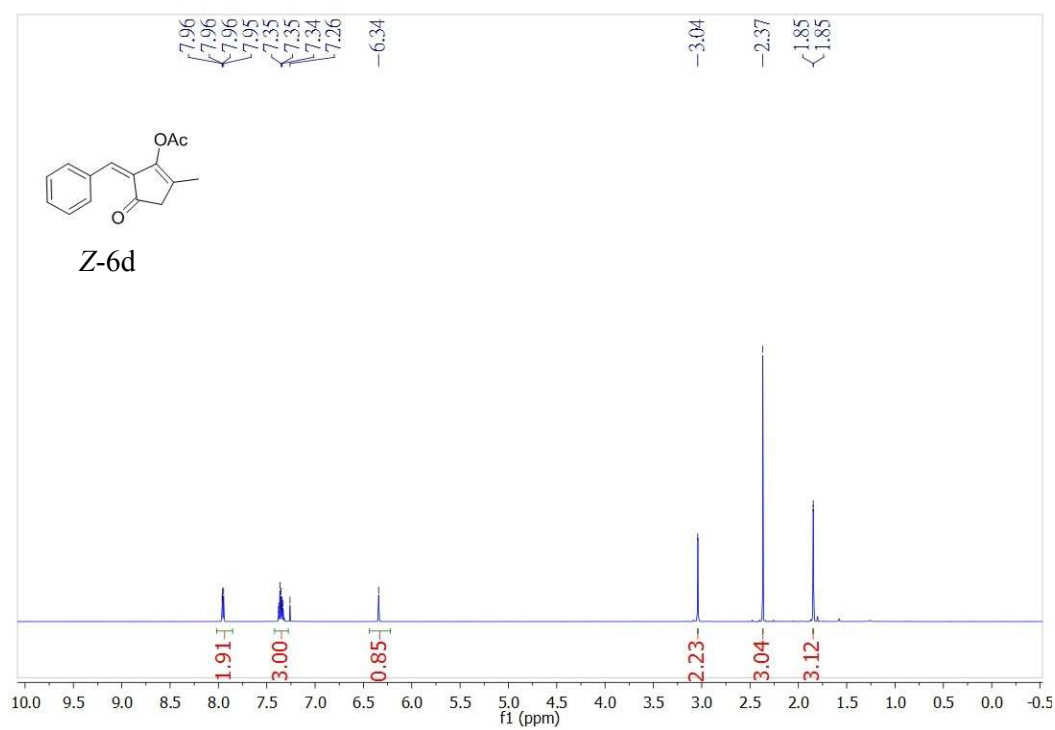

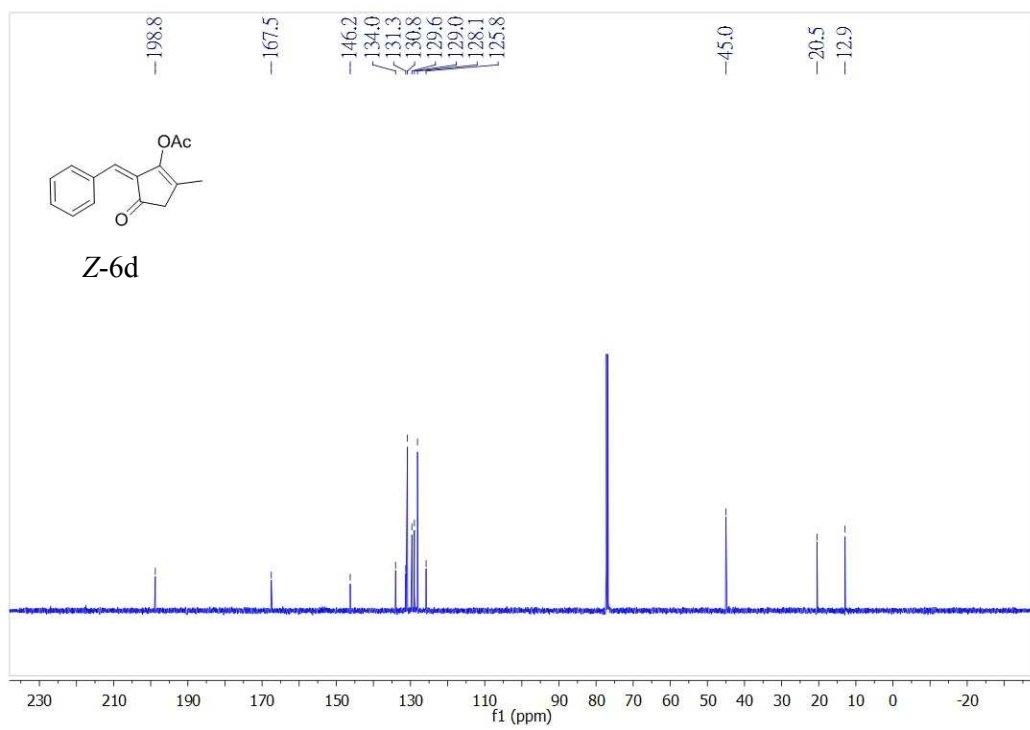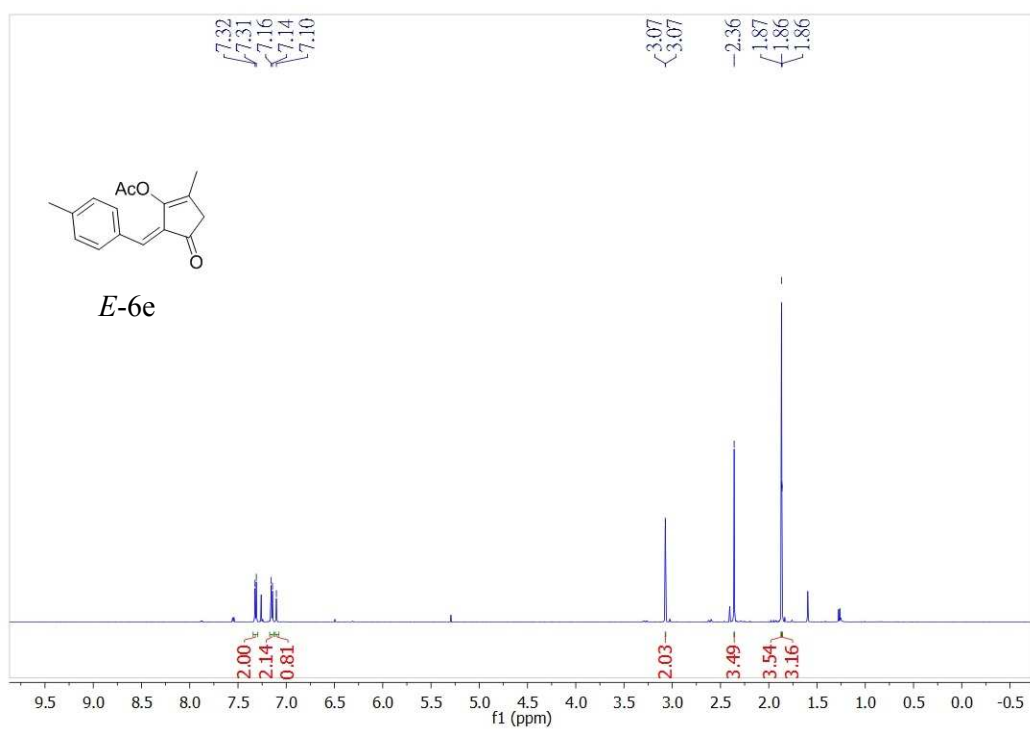

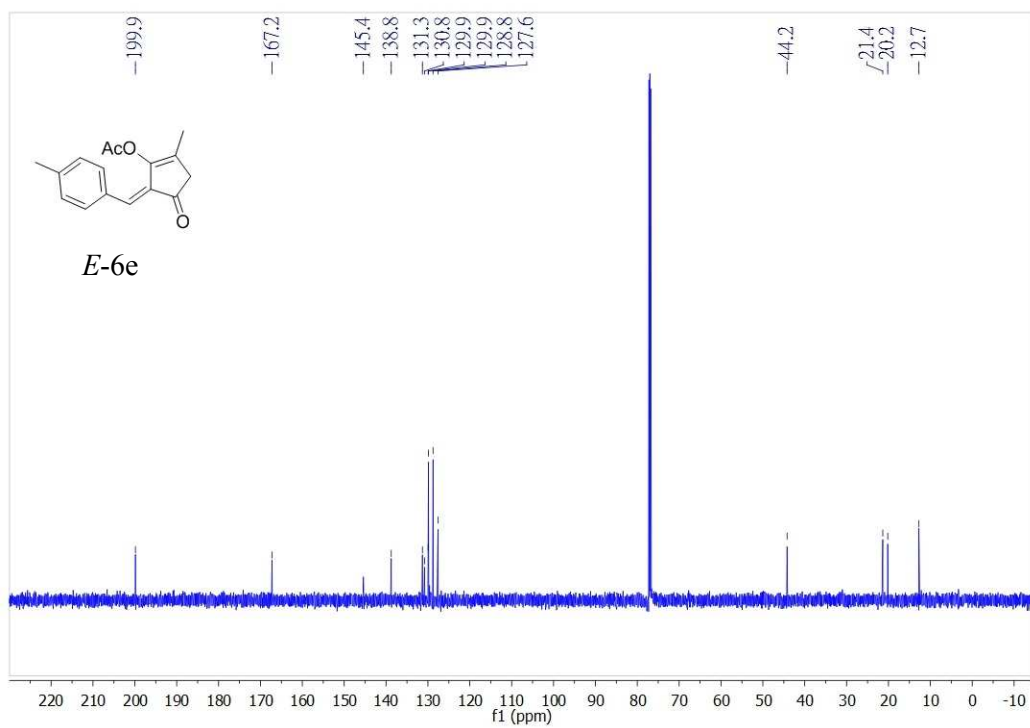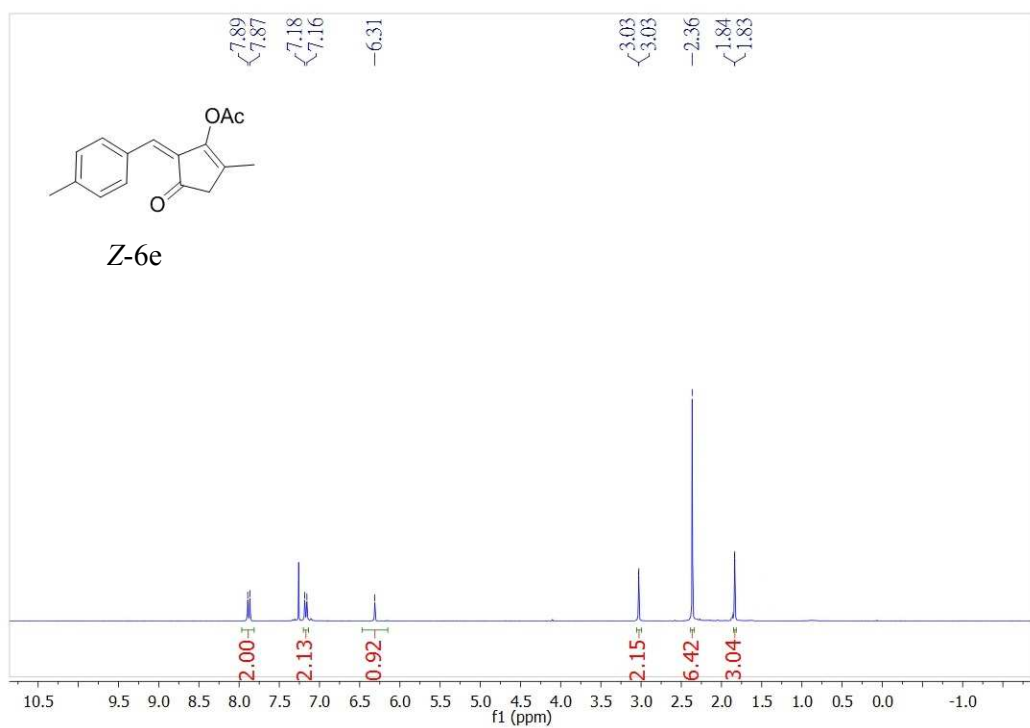

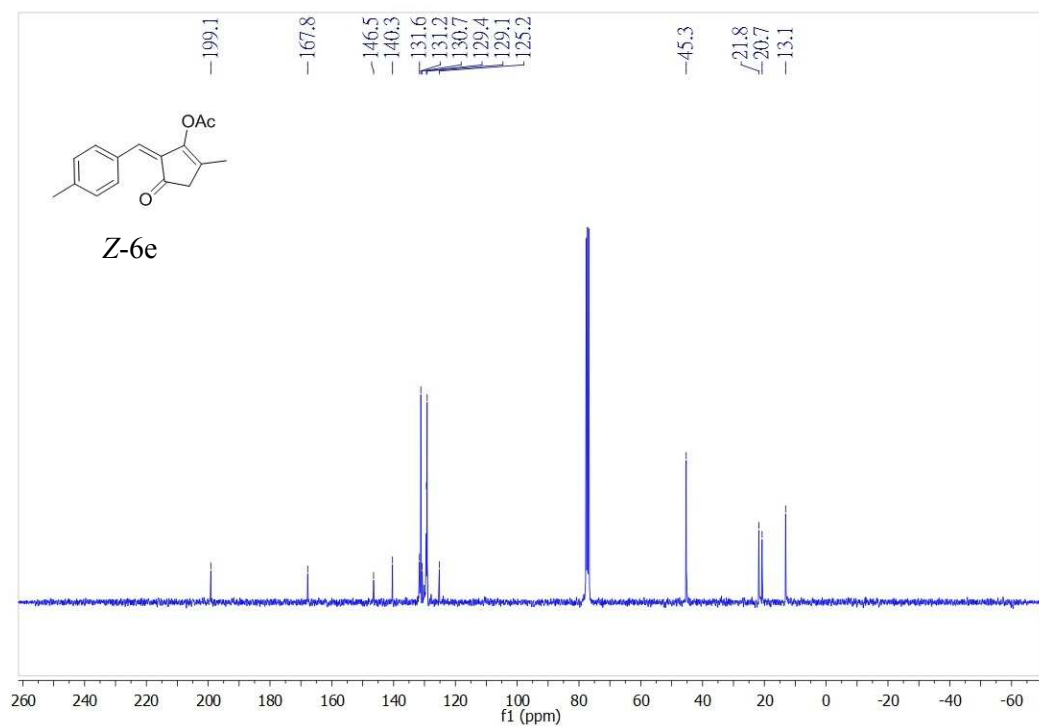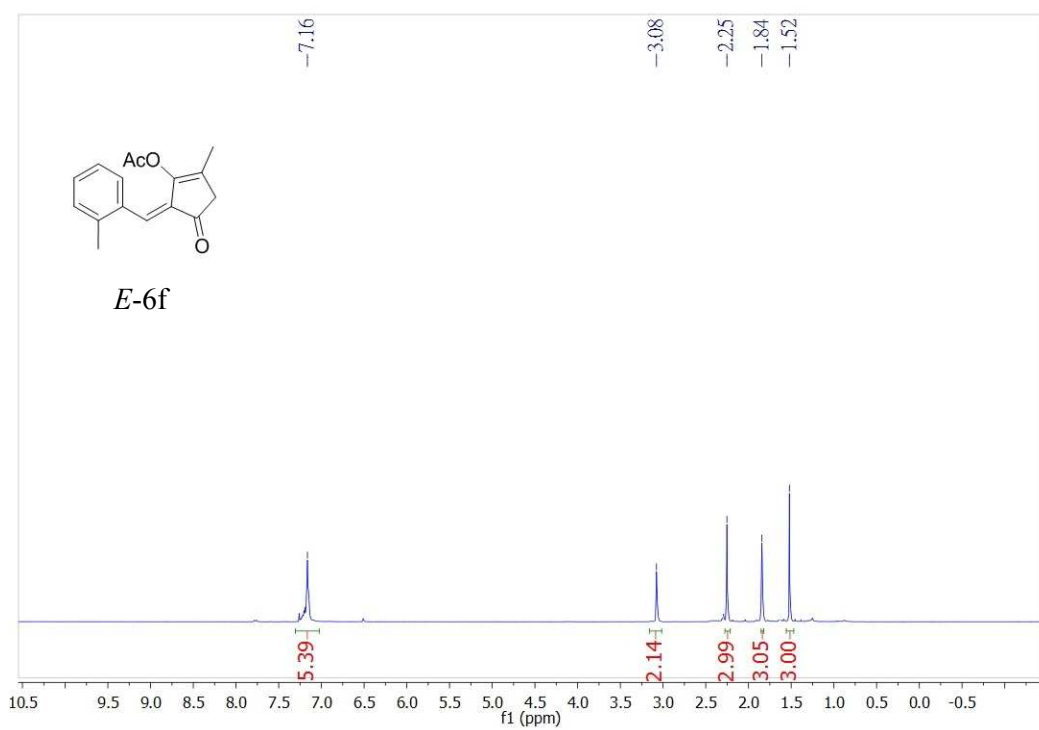

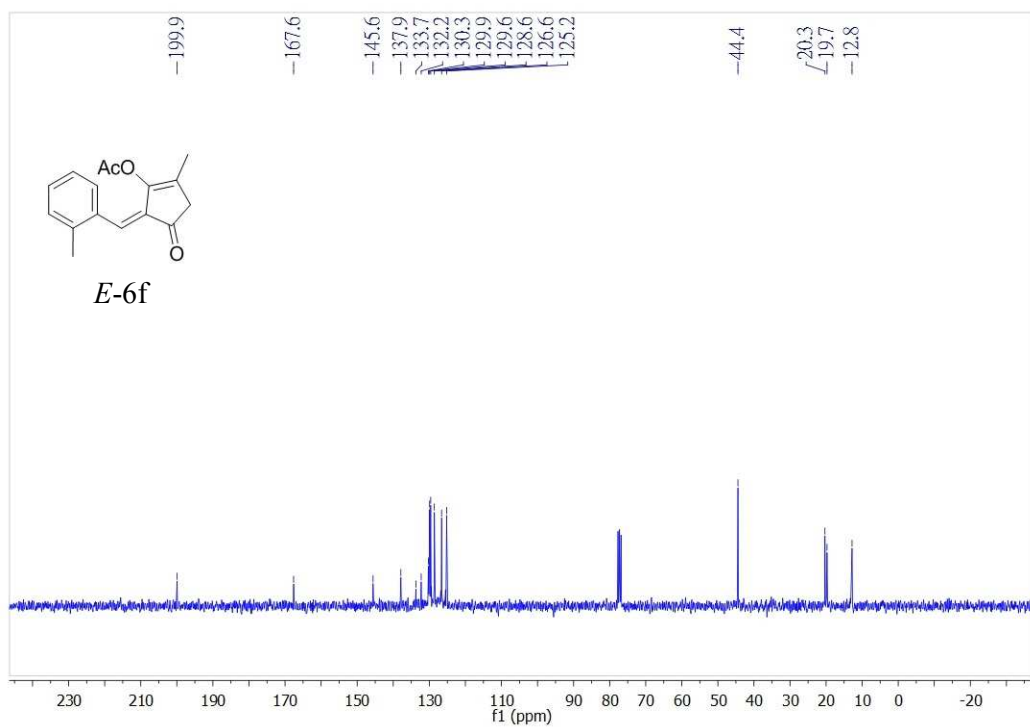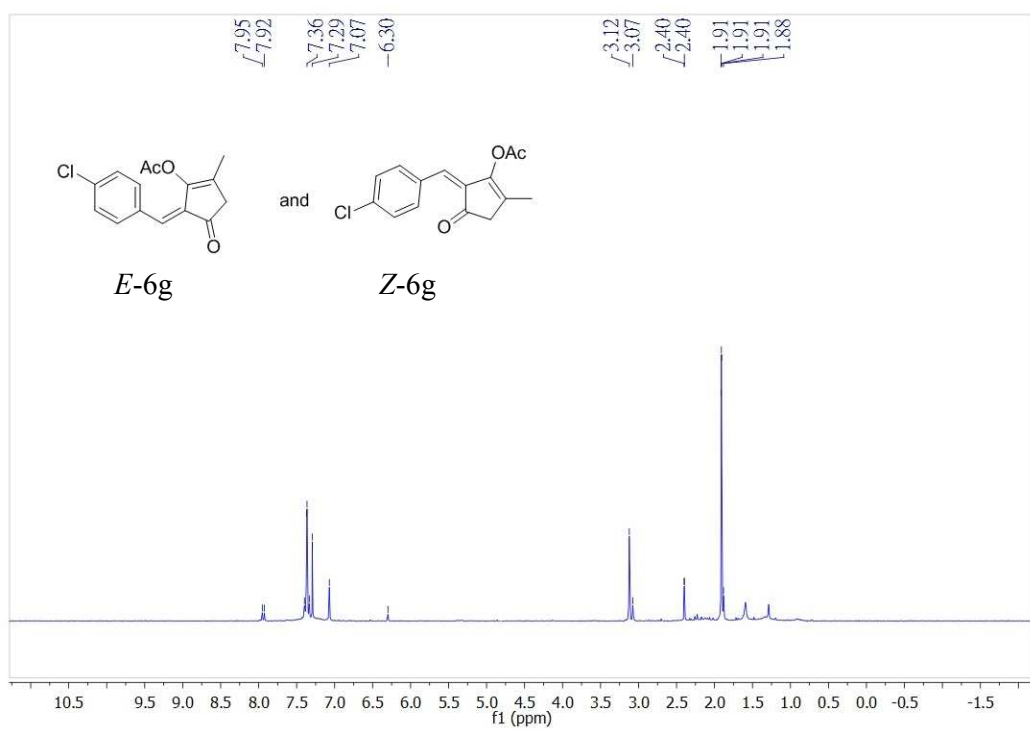

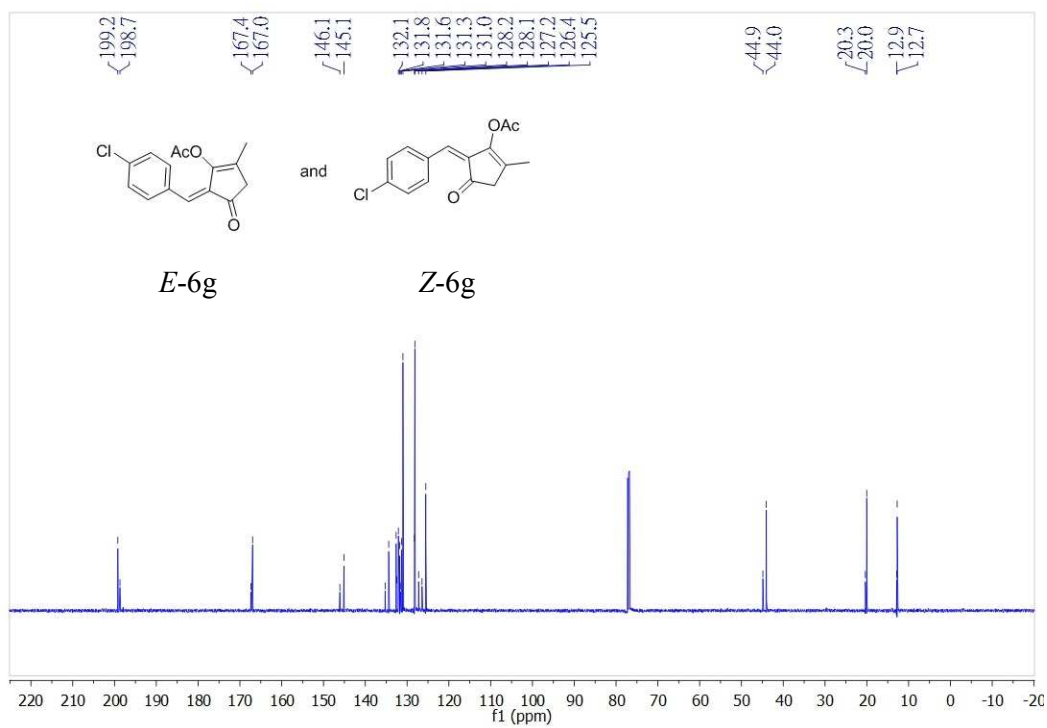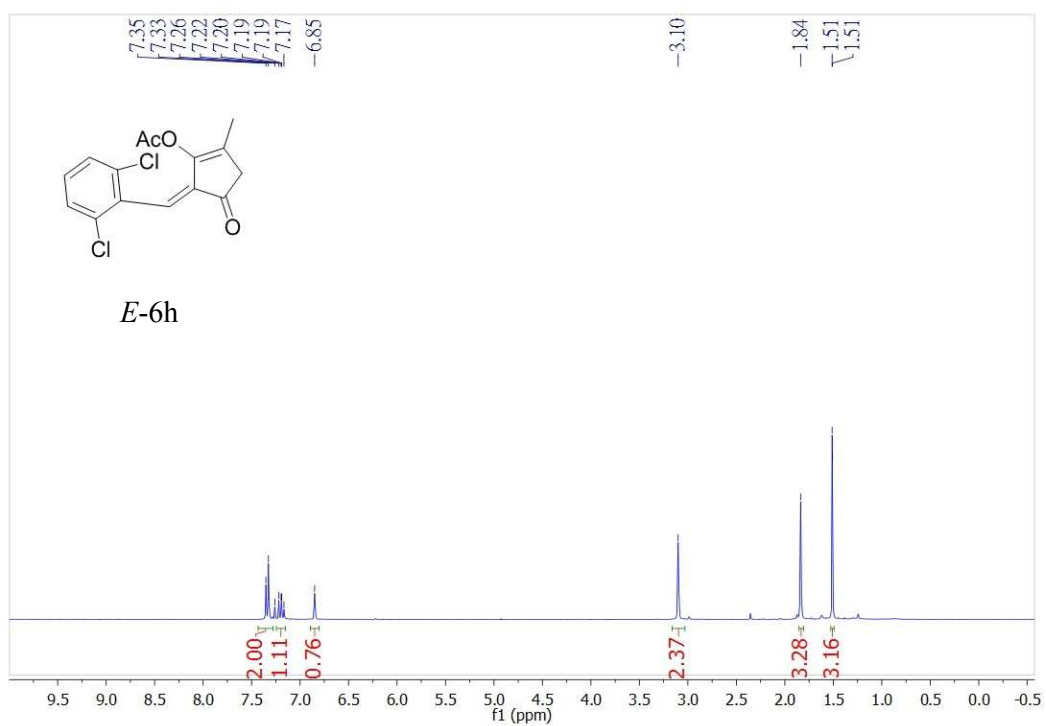



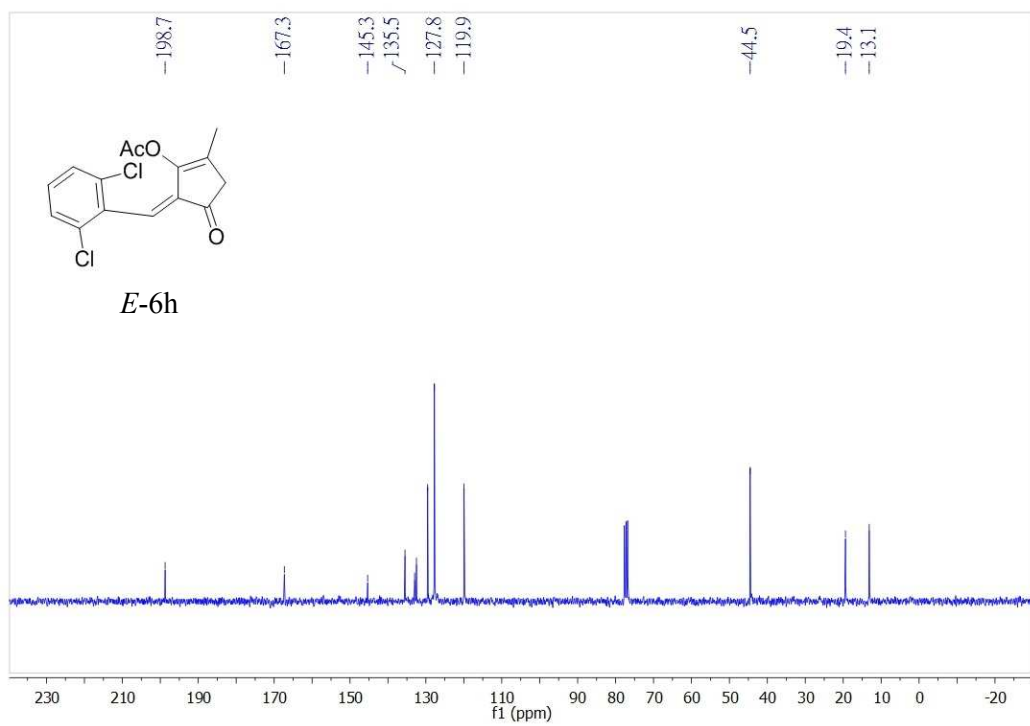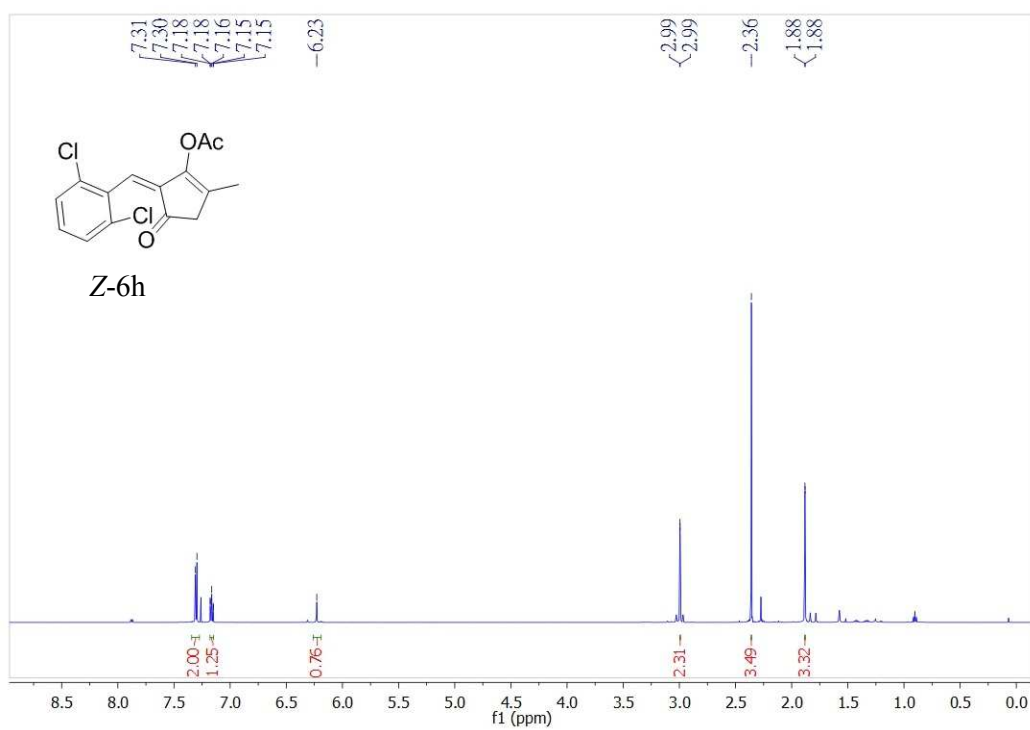

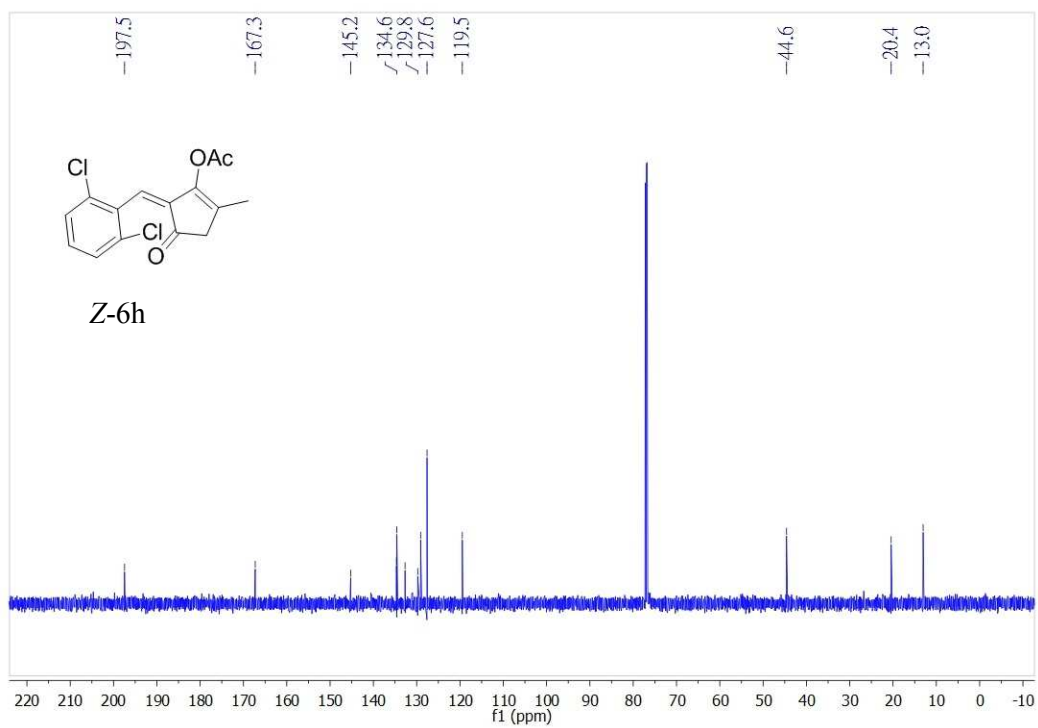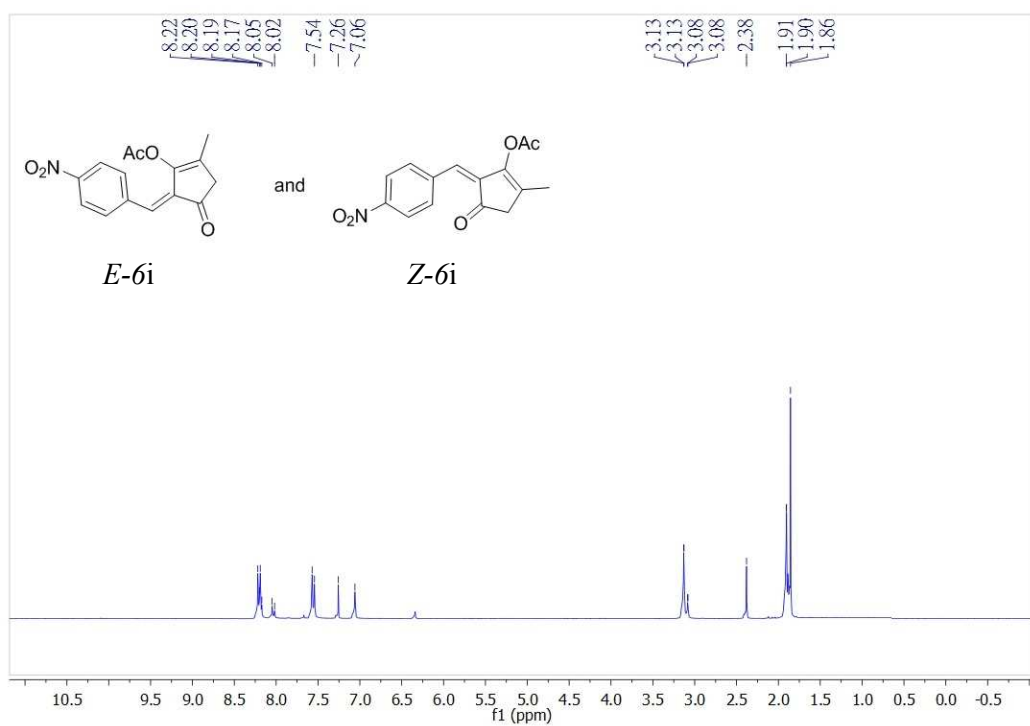

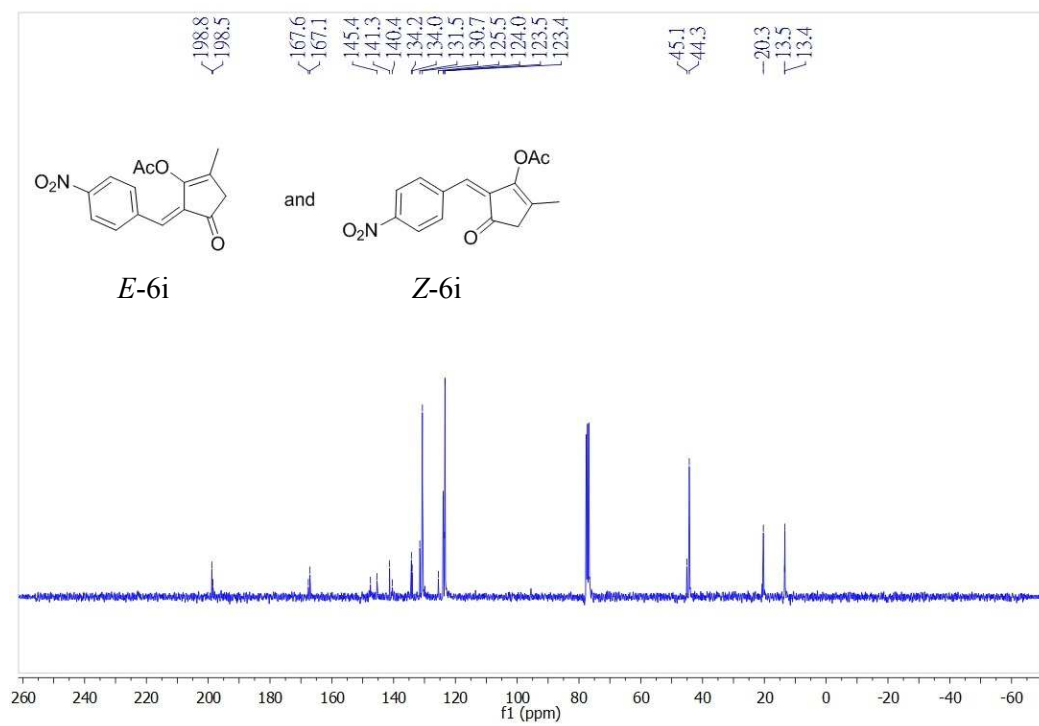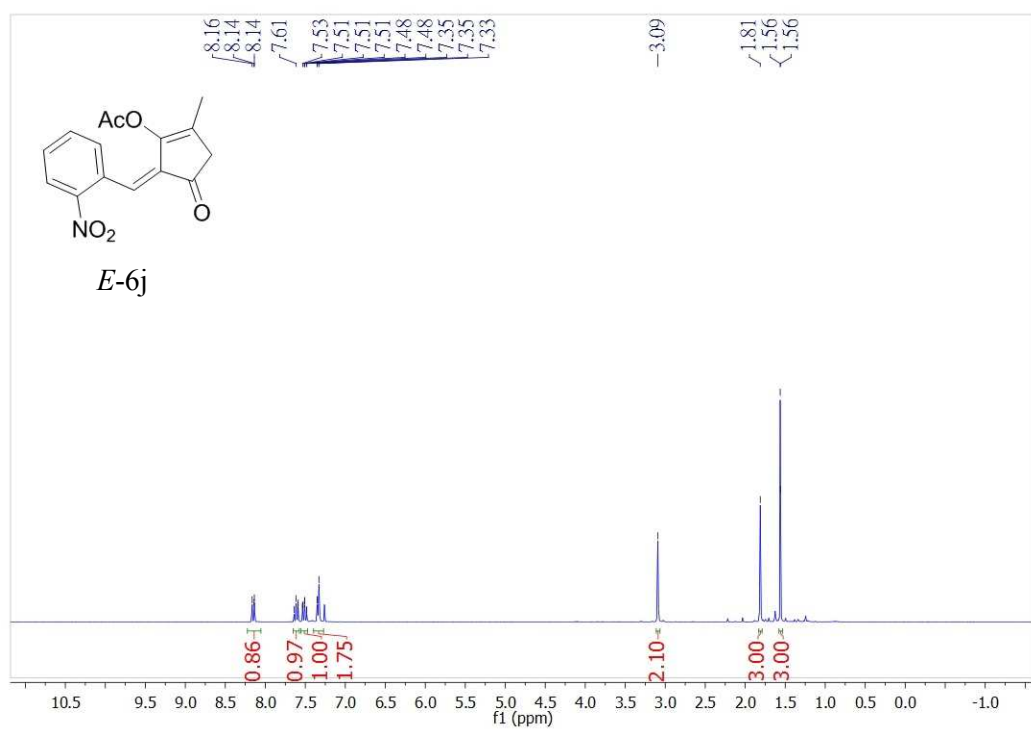

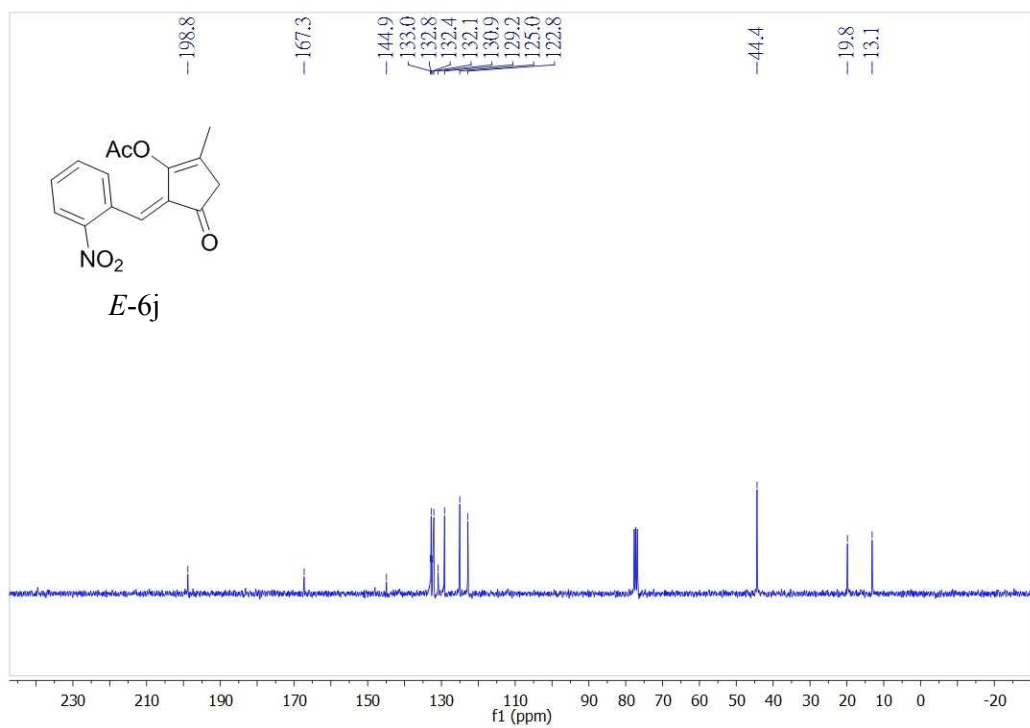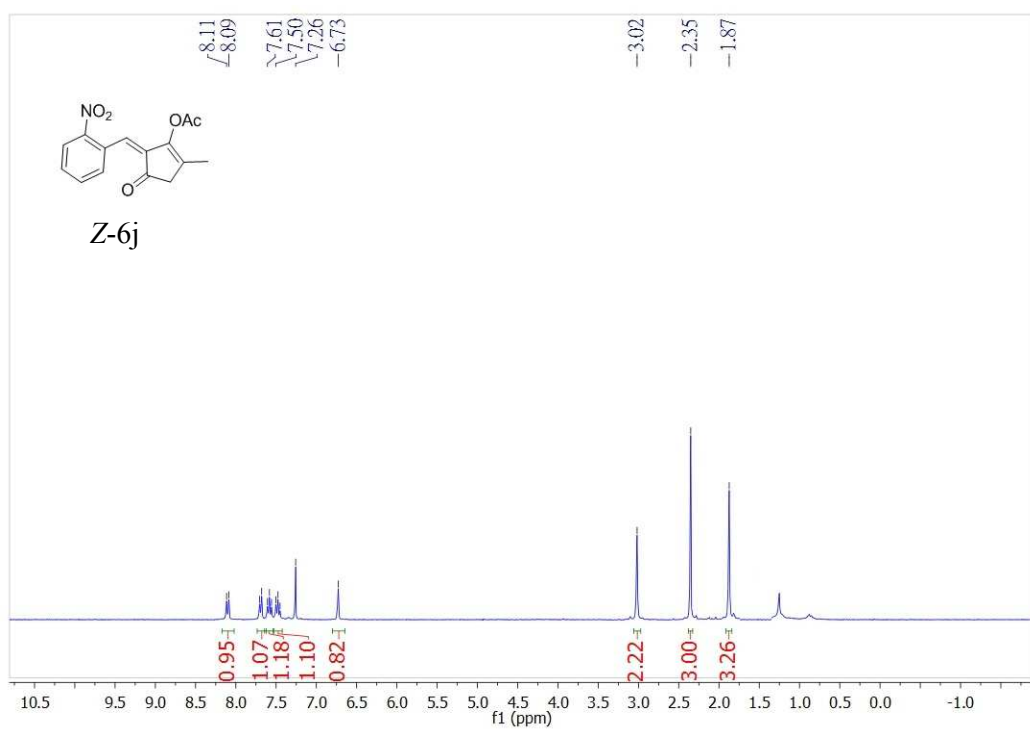

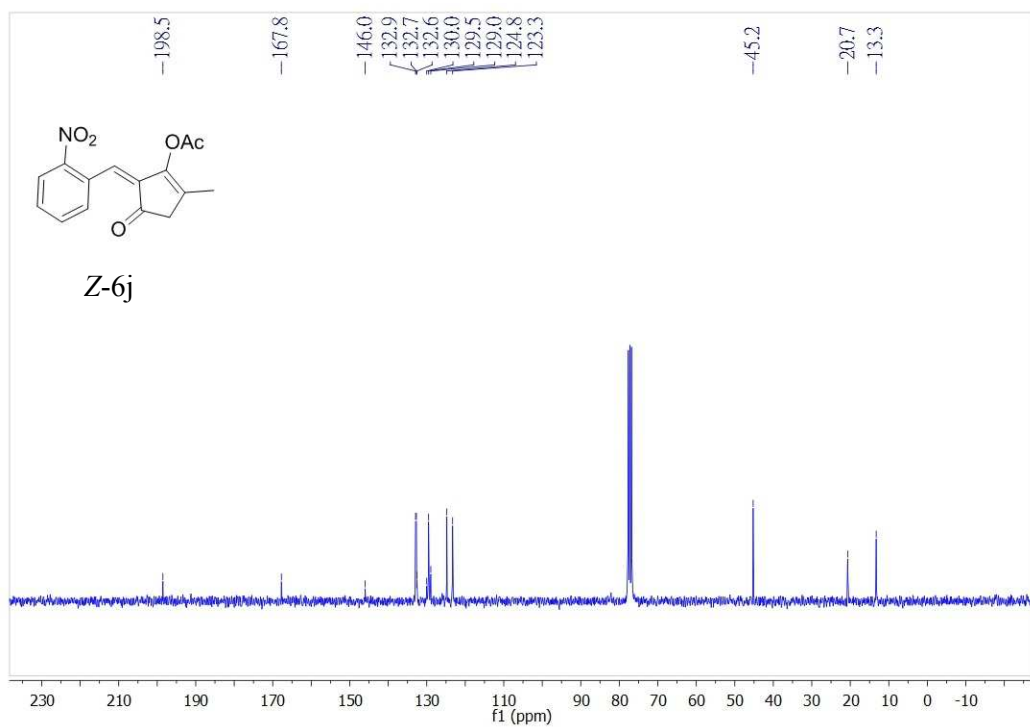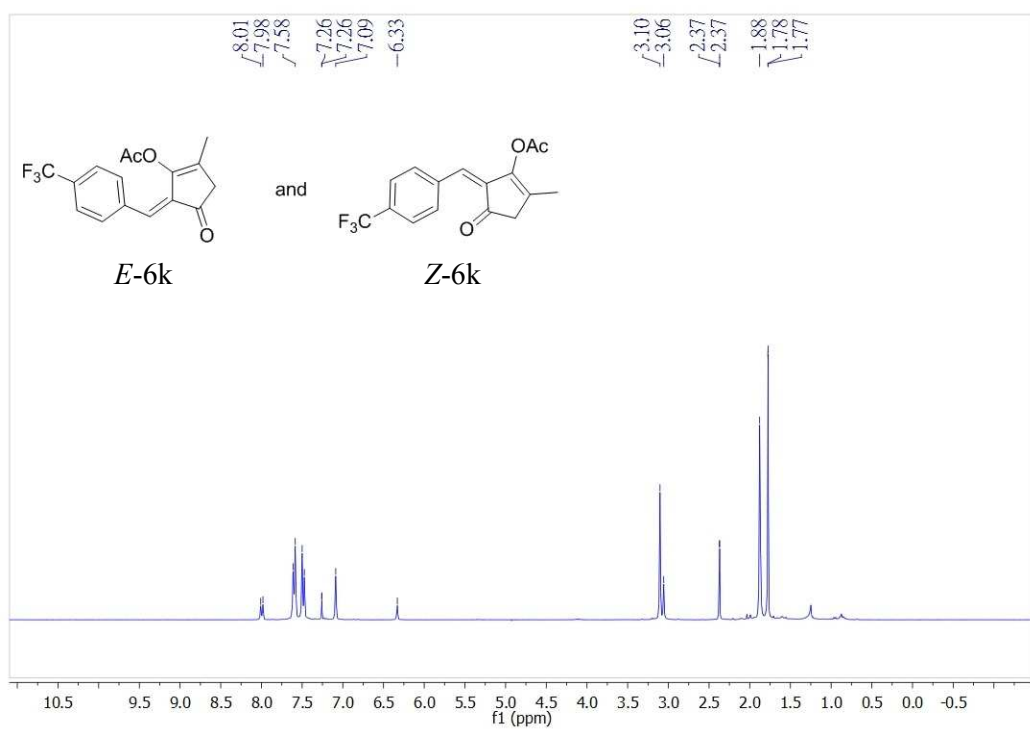

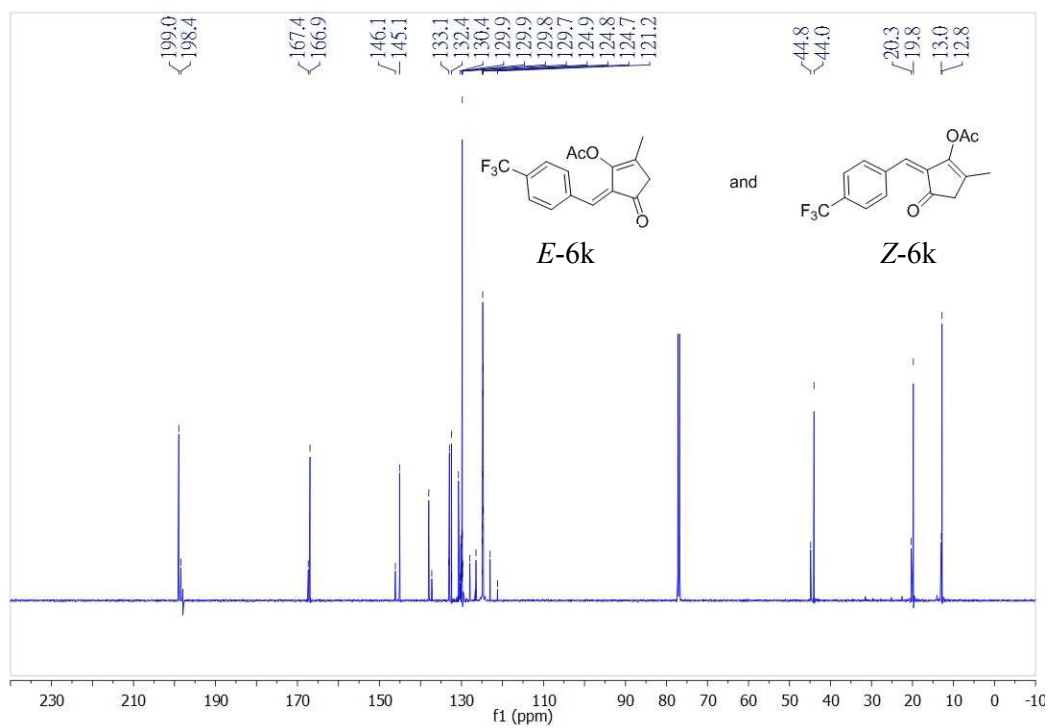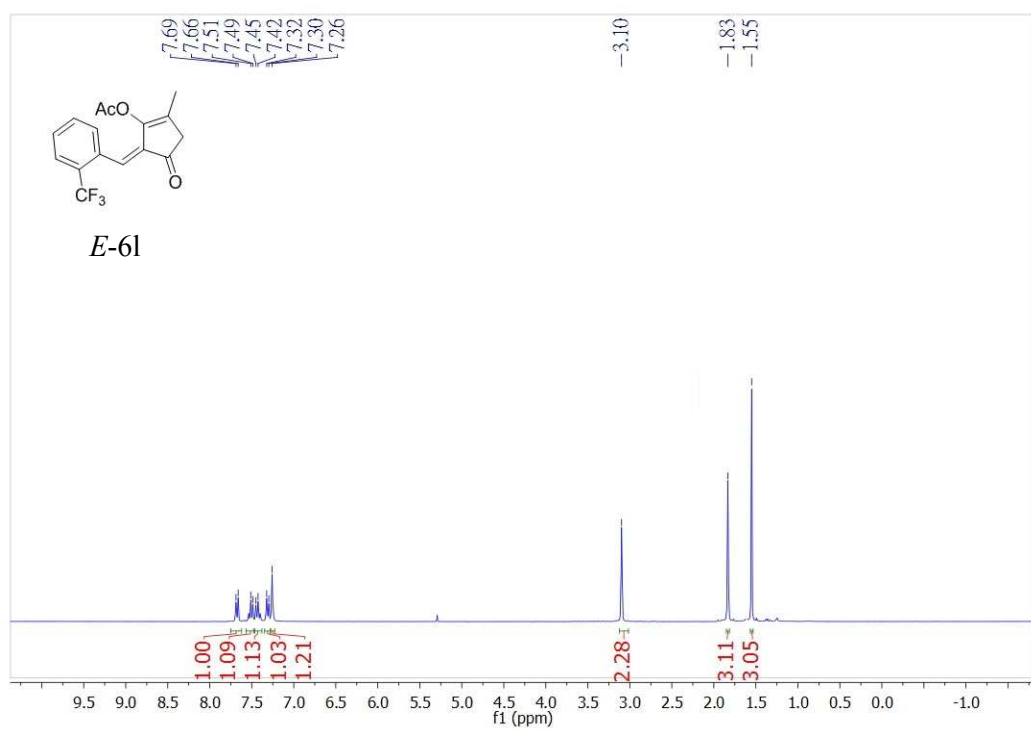

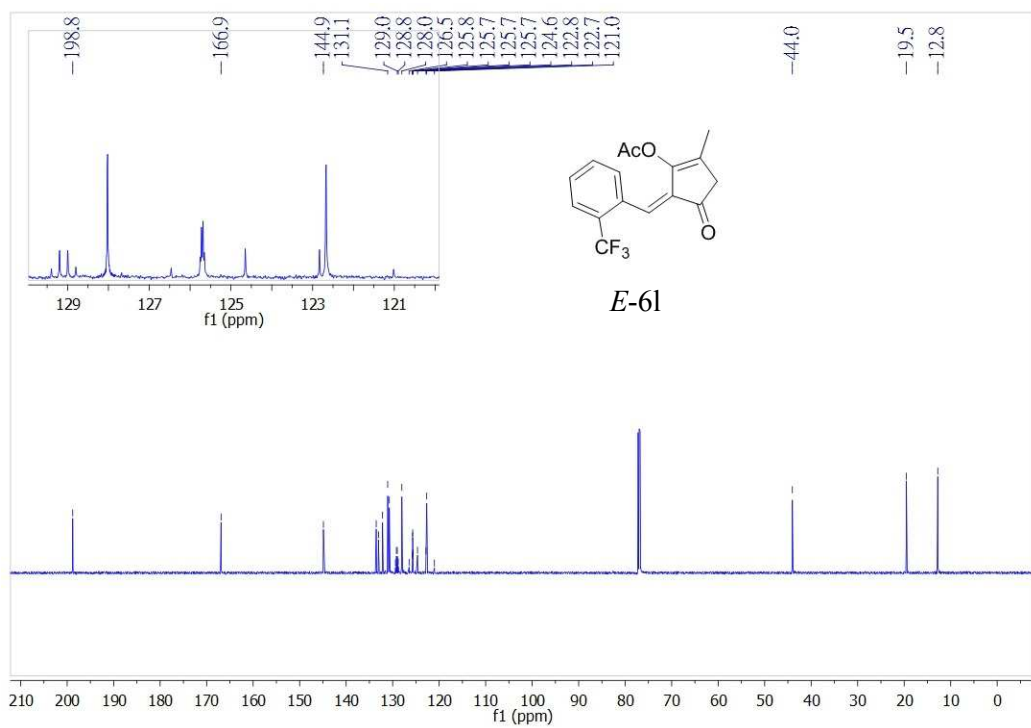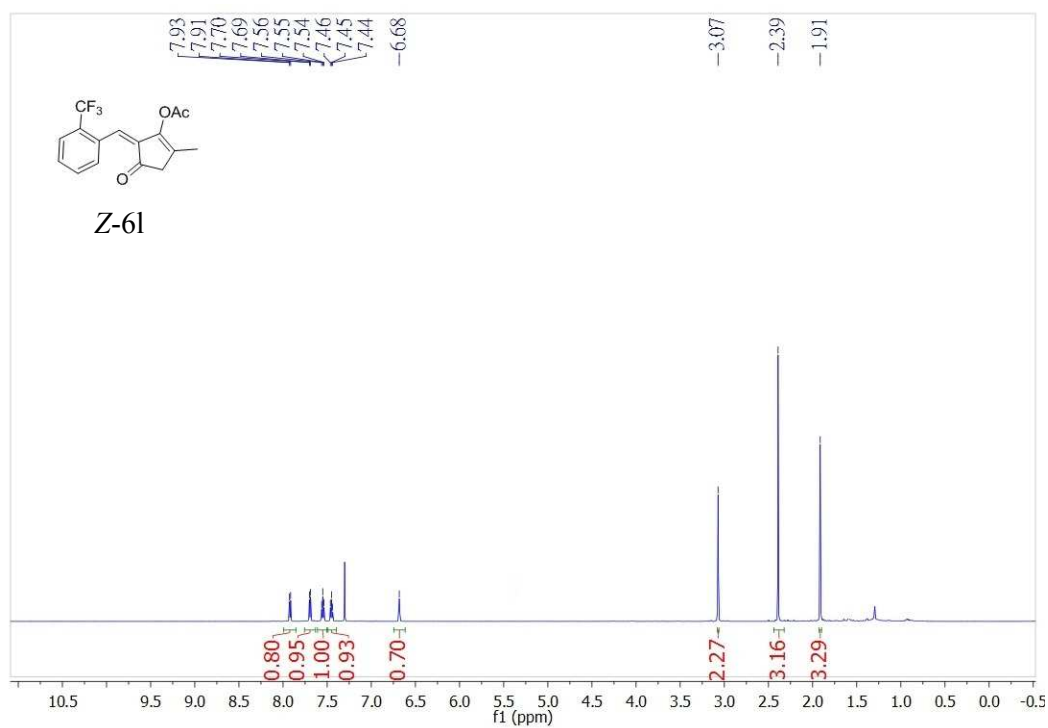

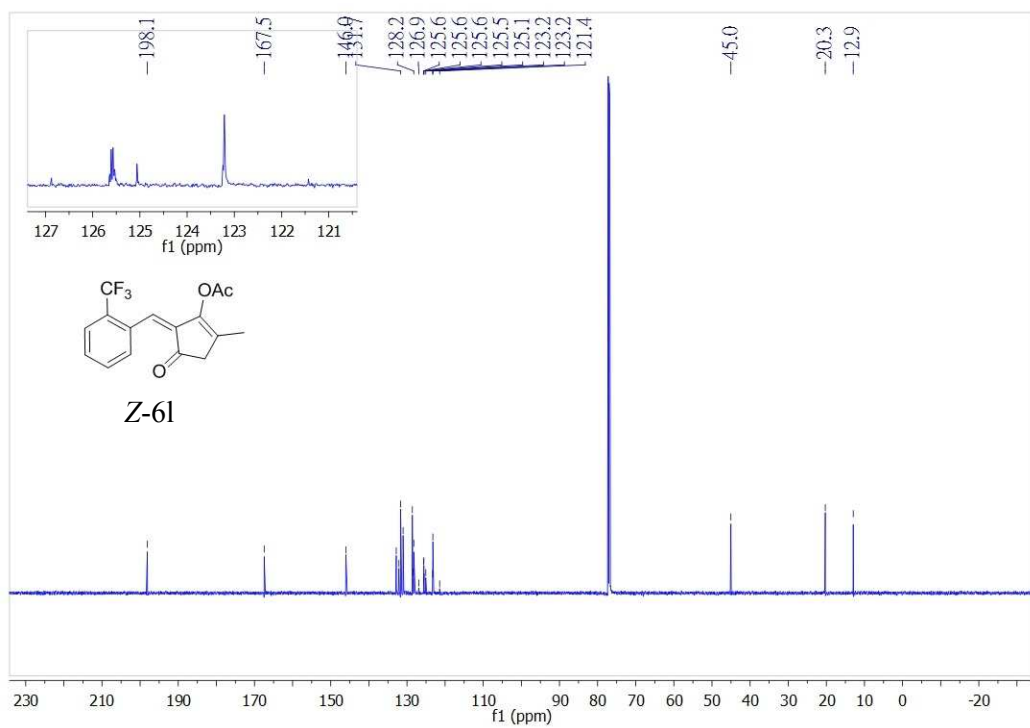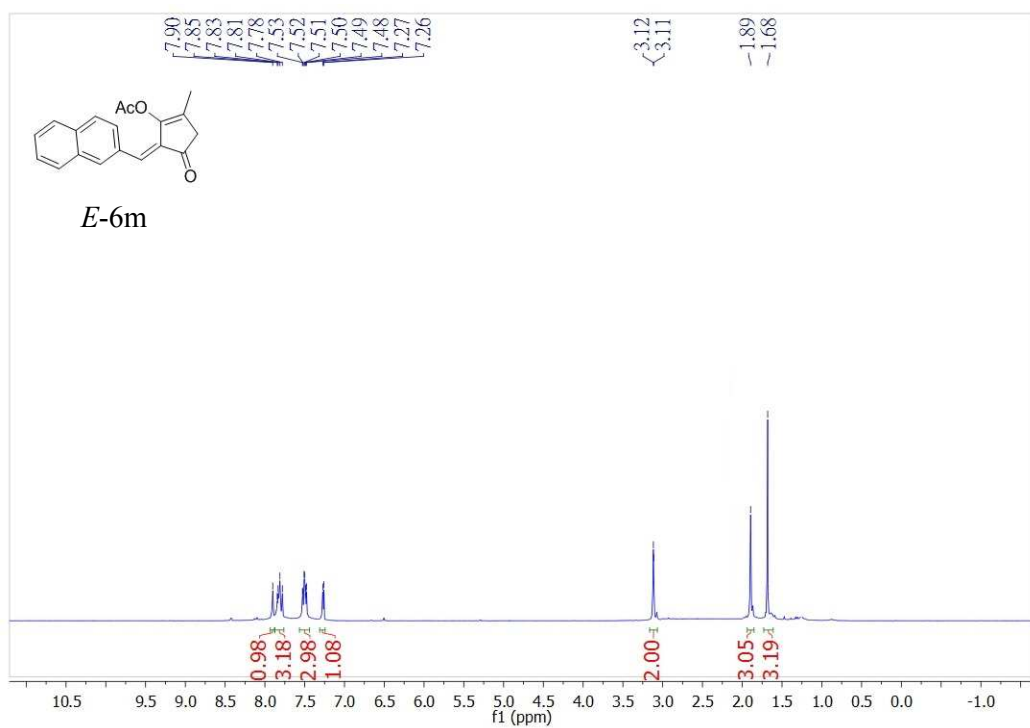



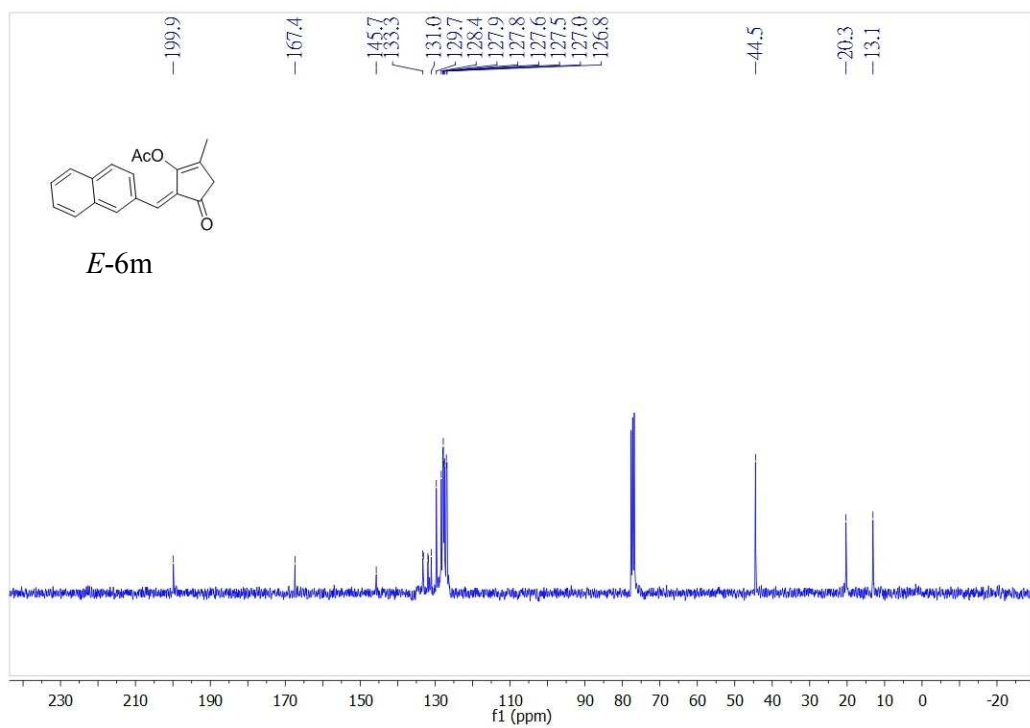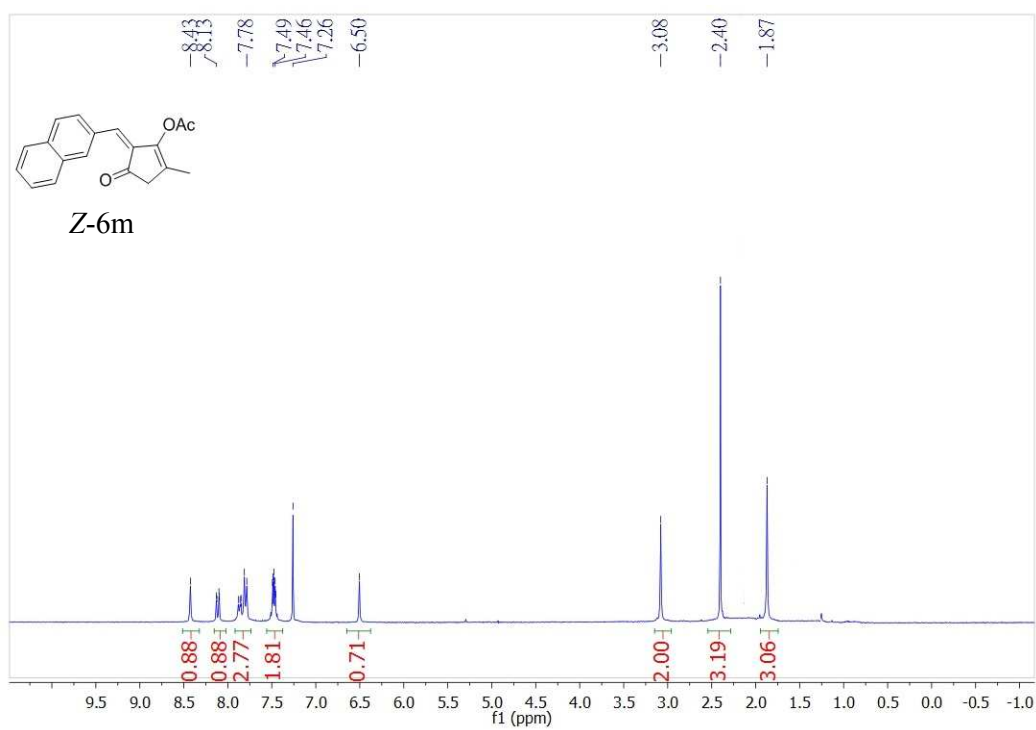

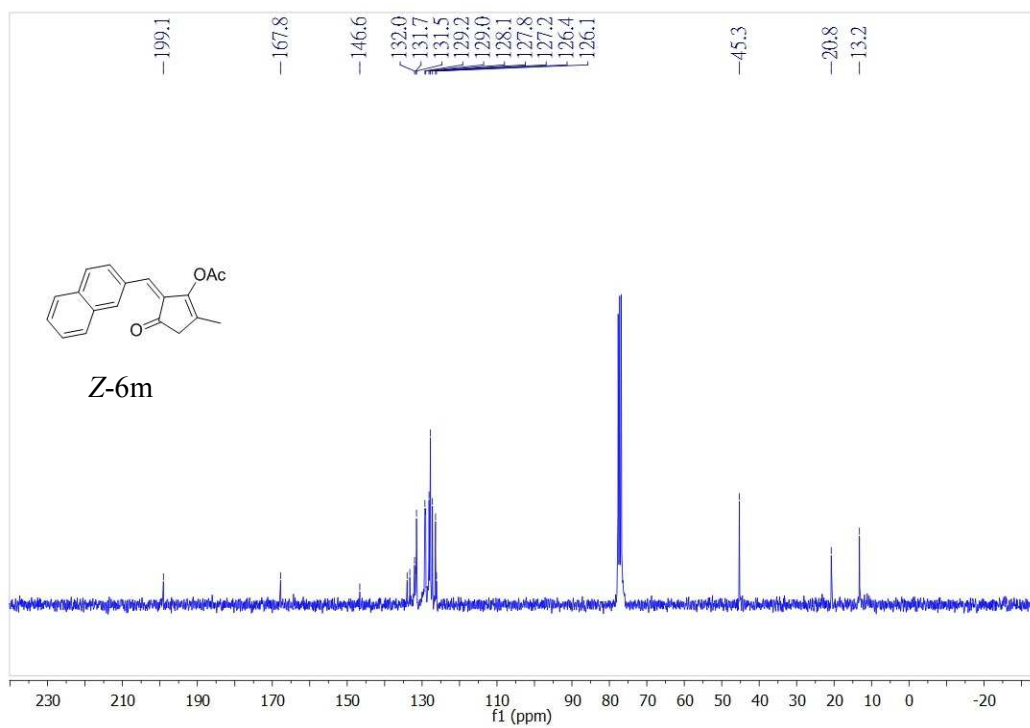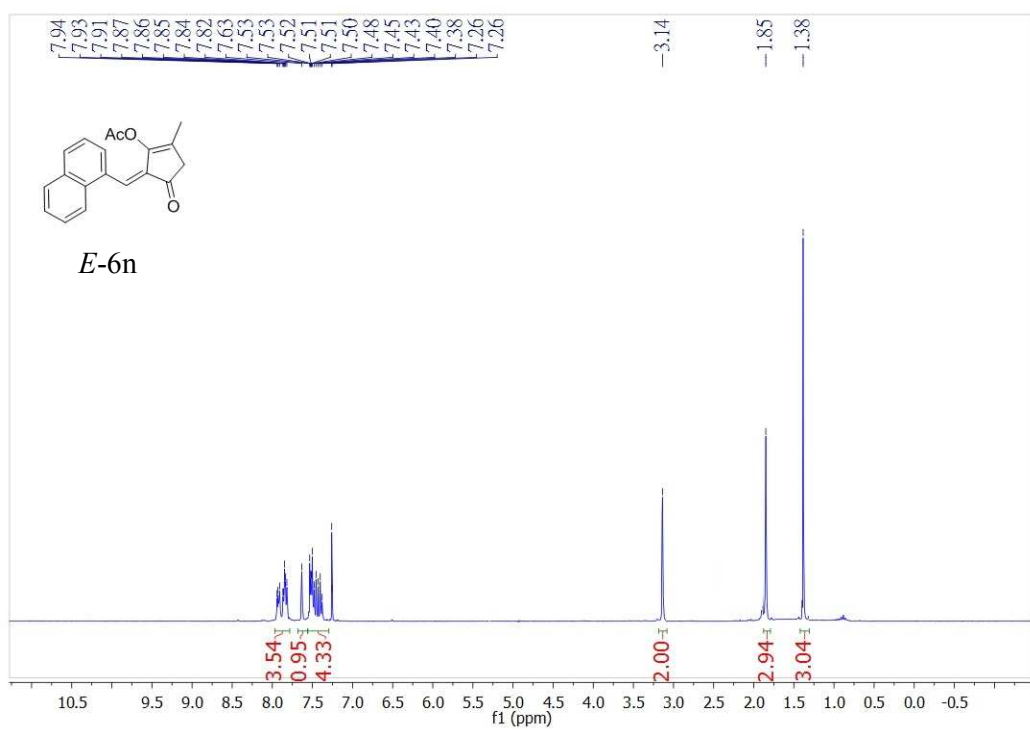



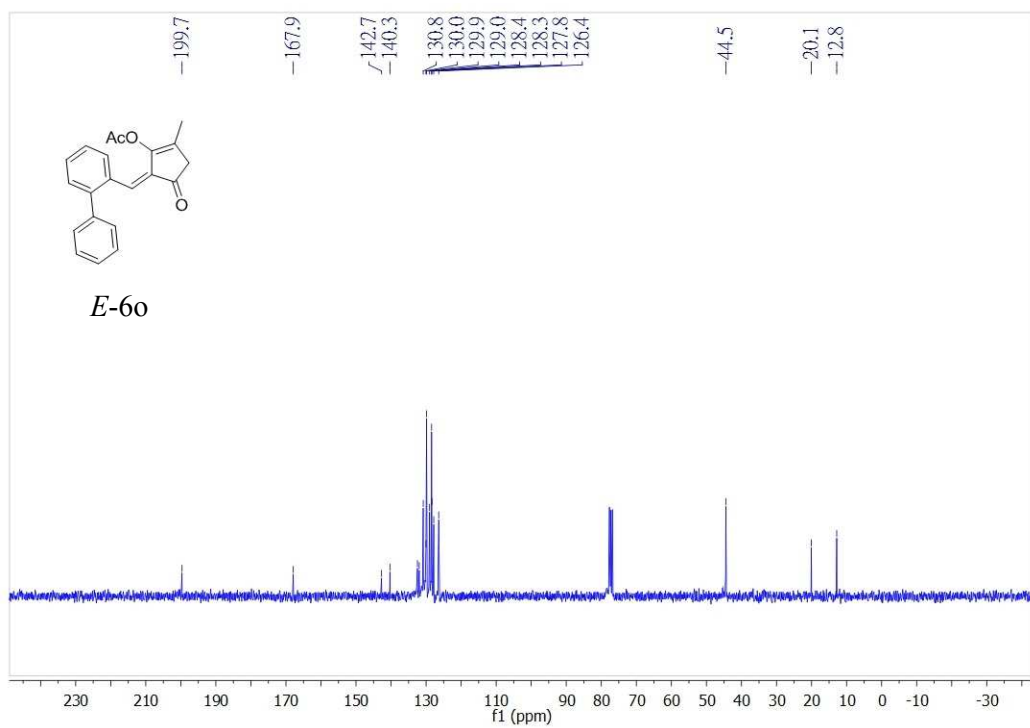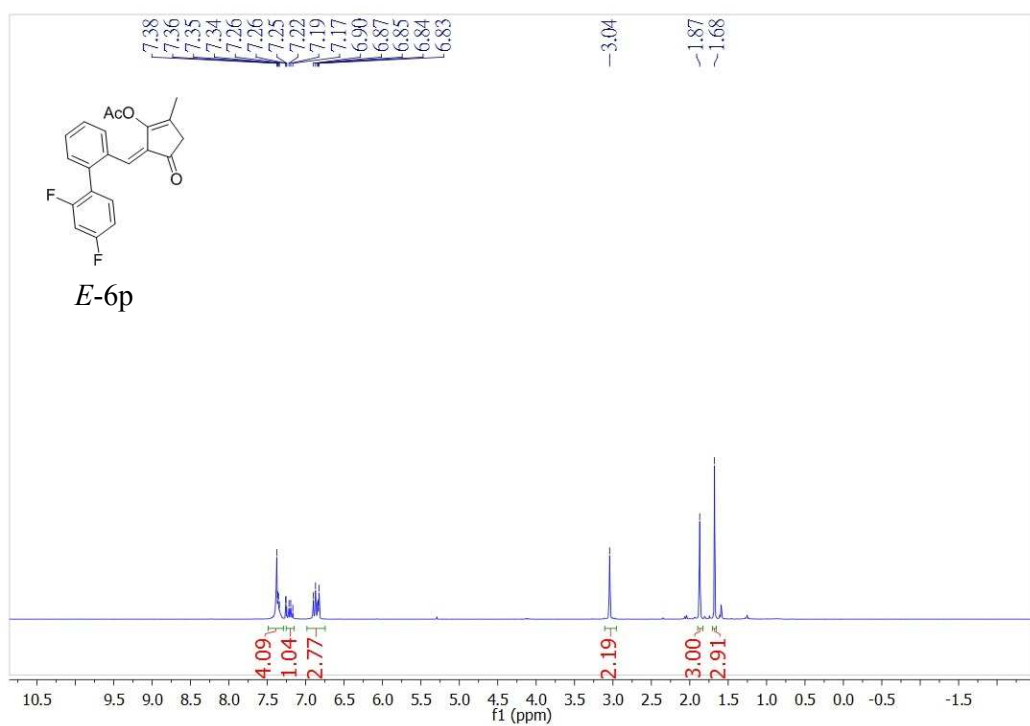

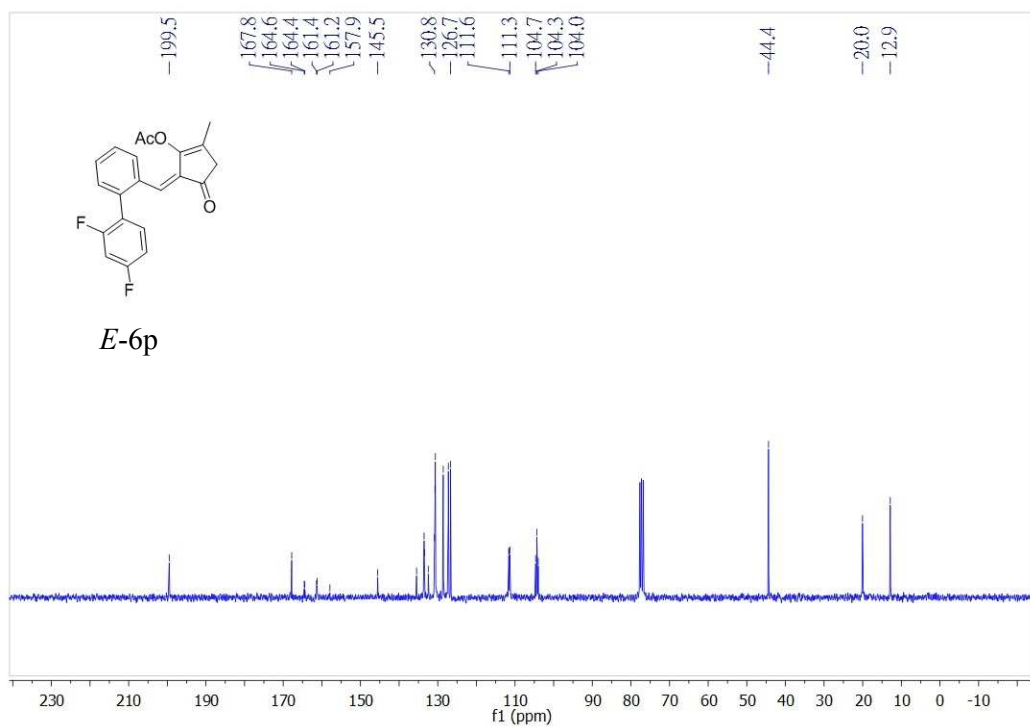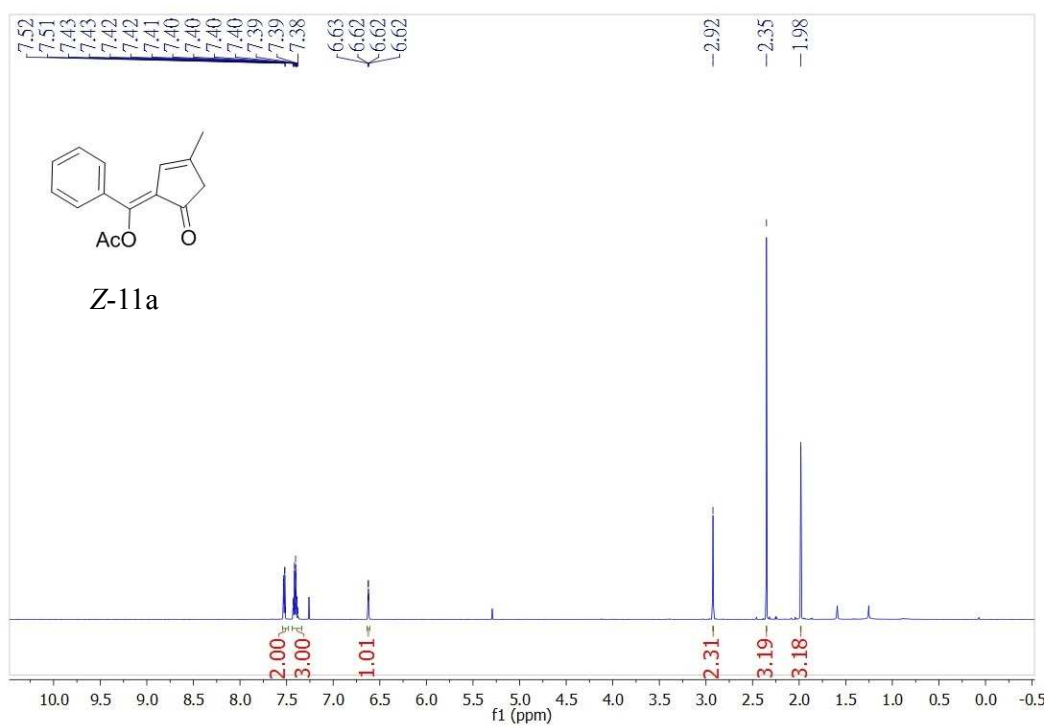

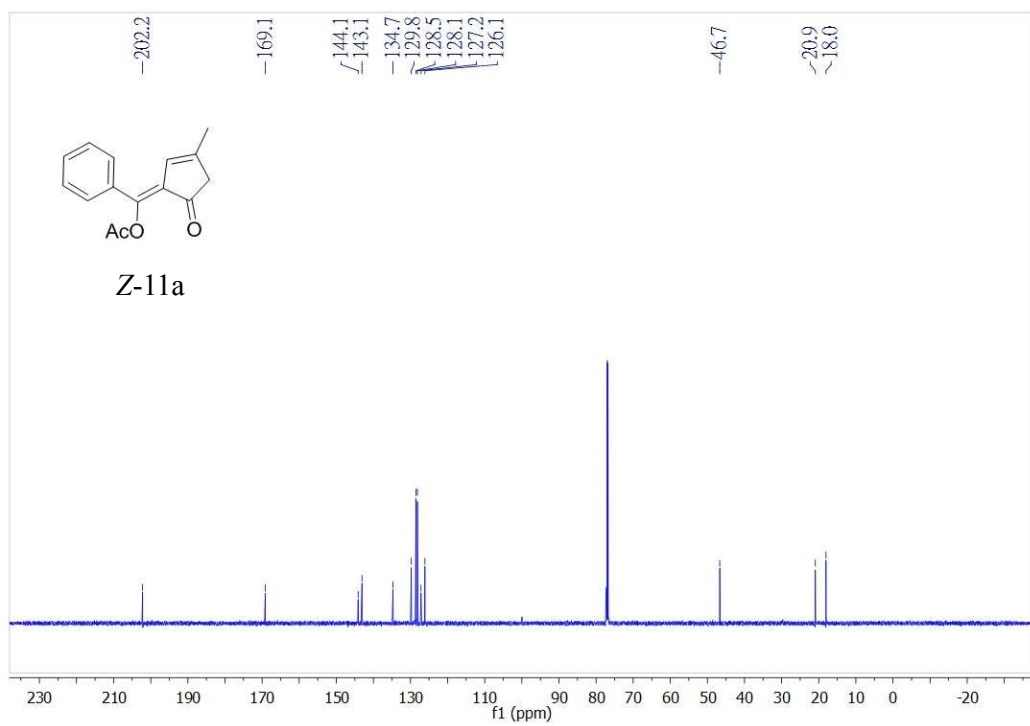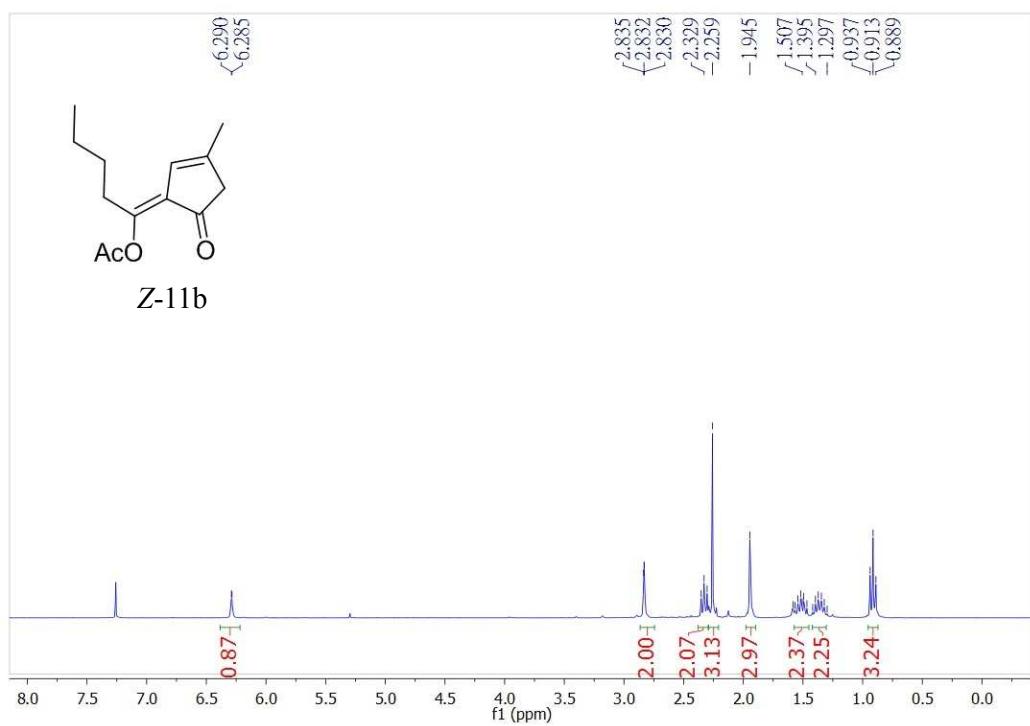

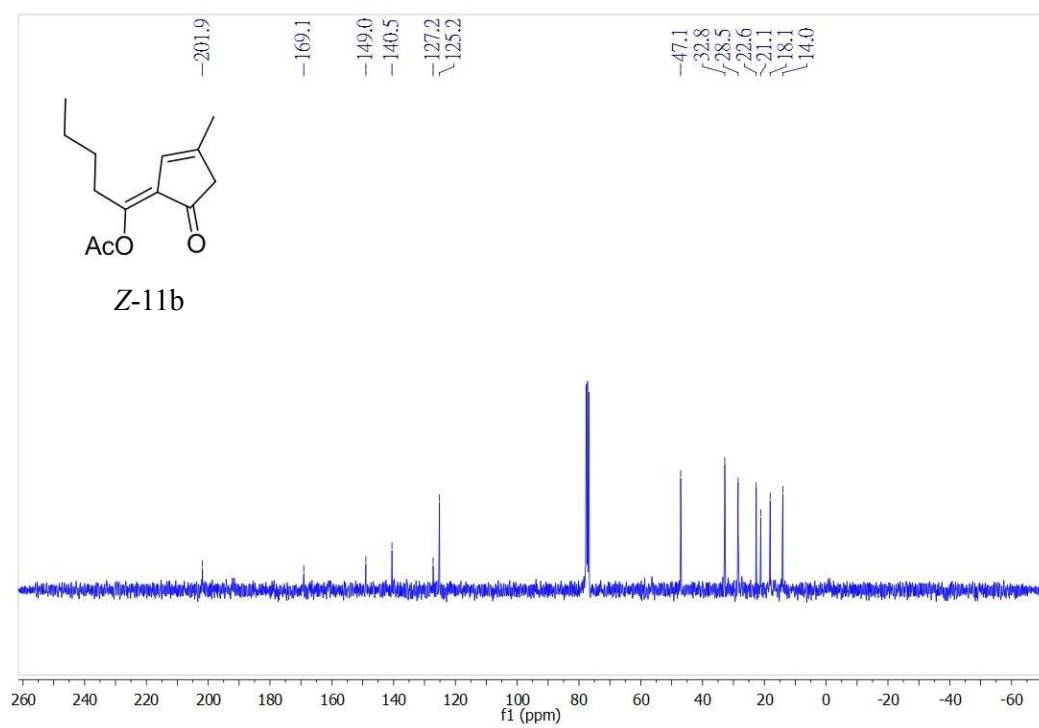

#### 4. NOESY 2D NMR Spectra of *E*-6d (a) and *Z*-6d (b).

Following two figures (a) and (b) give the NOESY spectra of *E*- and *Z*-6d respectively which allow the determination of their stereochemistry. As shown in (a), NOE effects were observed for *E*-6d between the aromatic protons H<sub>a</sub> and H<sub>b</sub> at  $\delta$  7.35 and the AcO proton signal at  $\delta$  1.80. In contrast, (b) shows no NOE effect between the aromatic protons and the AcO protons for *Z*-6d.

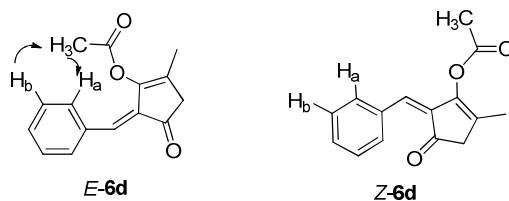

(a)

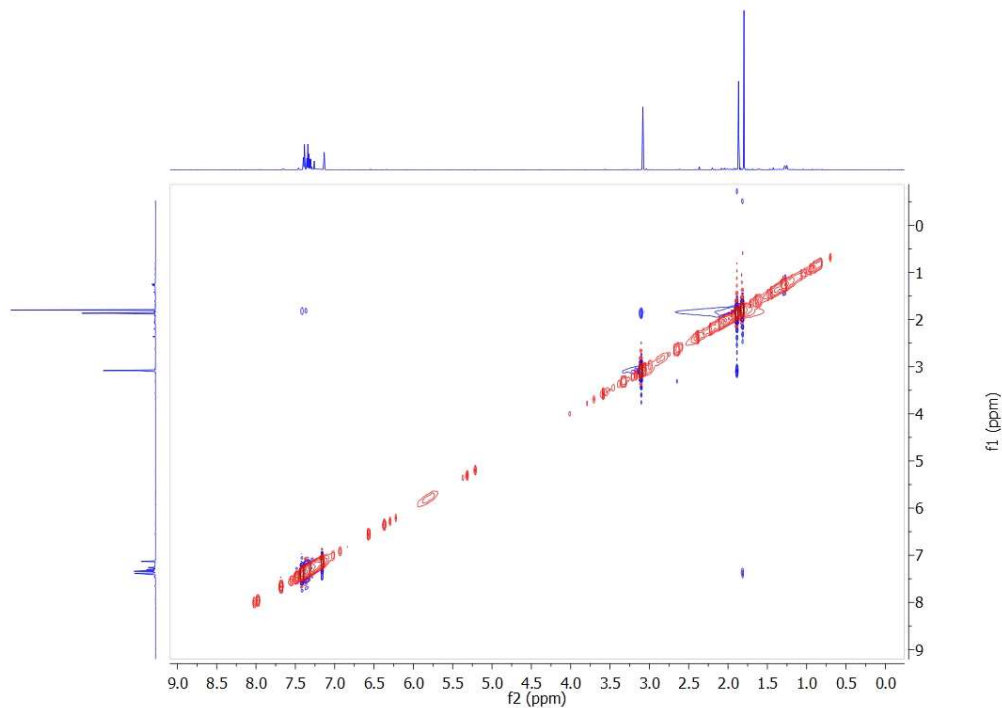

(b)



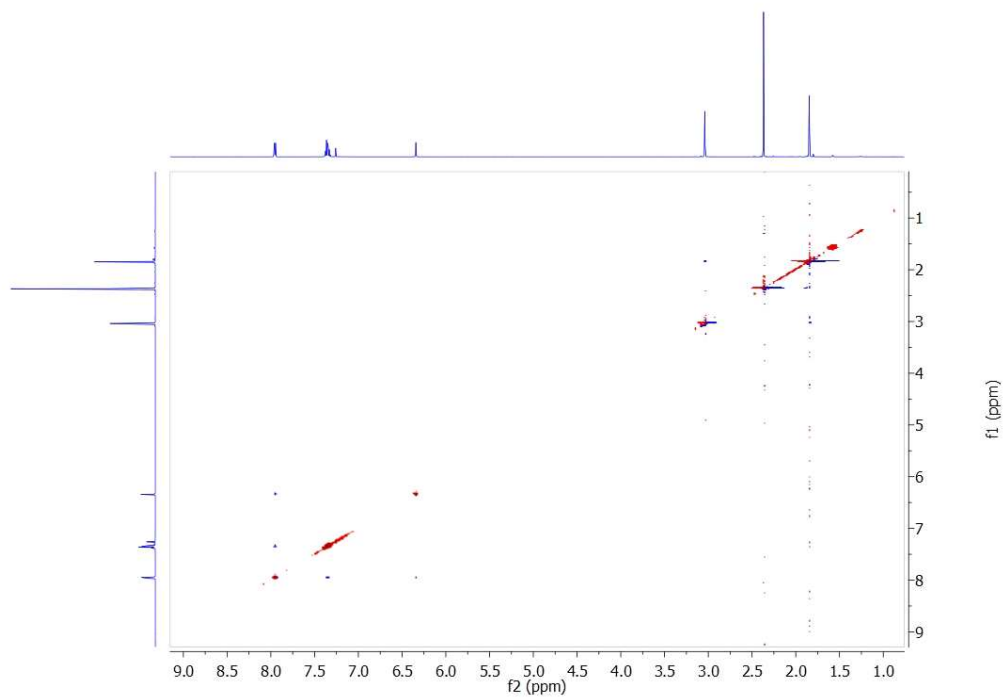

## 5. NOESY 2D Spectra NMR for cycloaddition products **Z-11a**

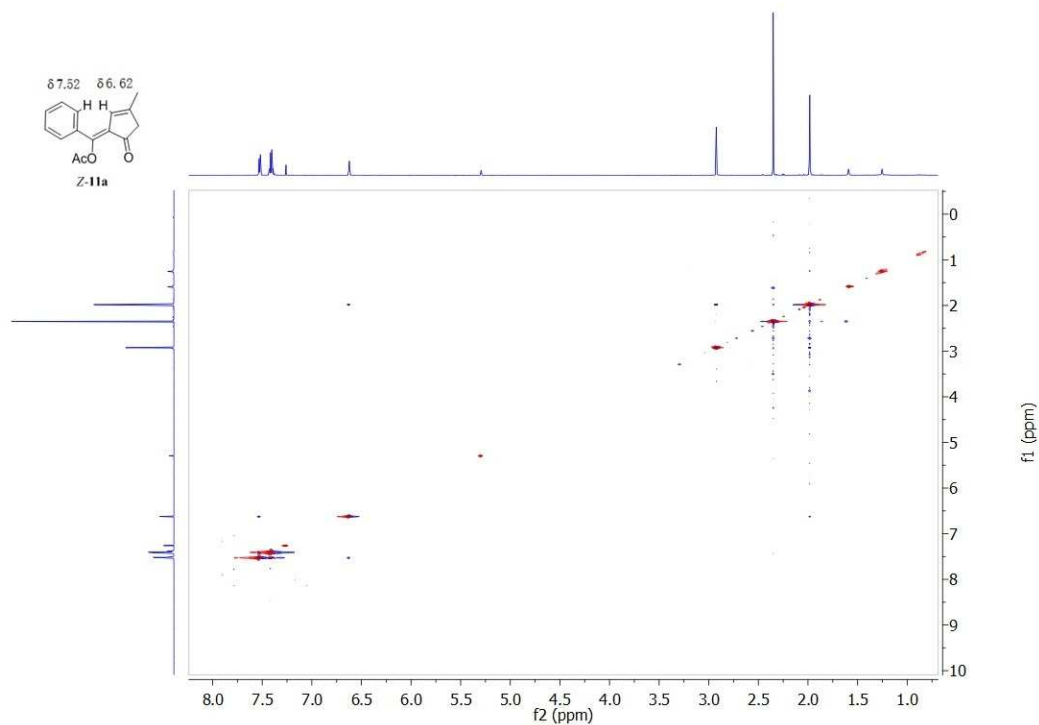

As shown in the figure, NOE effect was observed for **Z-11a** between the aromatic protons at  $\delta$  7.52 and vinyl proton at 6.62 on the cyclopentenone ring.

## 6. NMR spectra used to determine the *E-Z* ratio

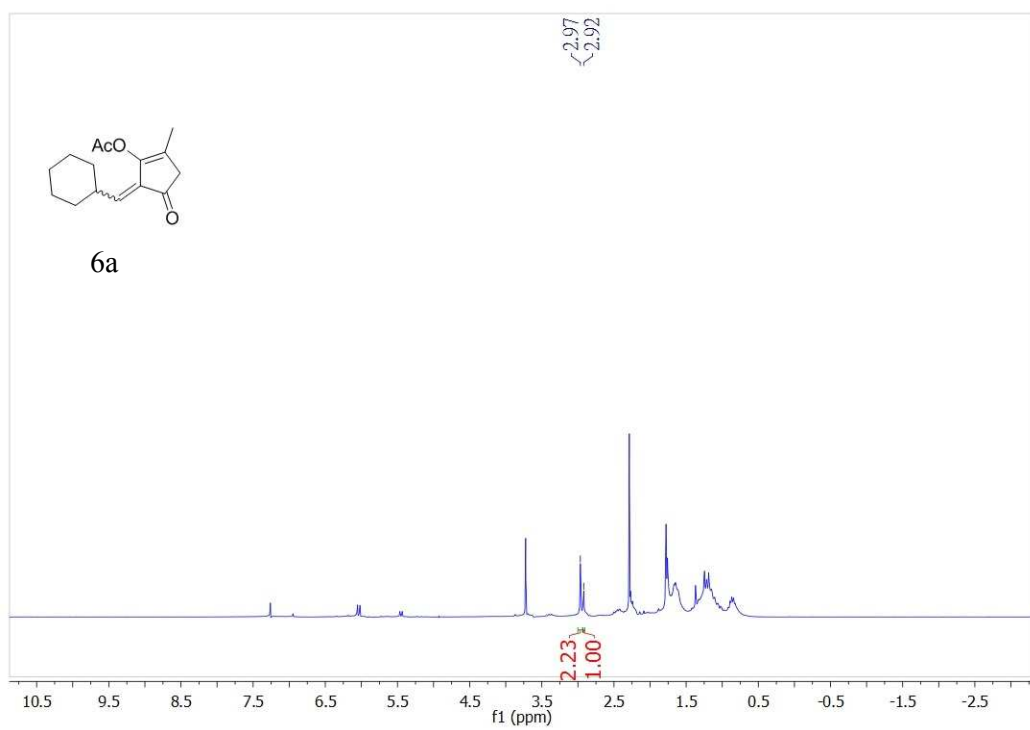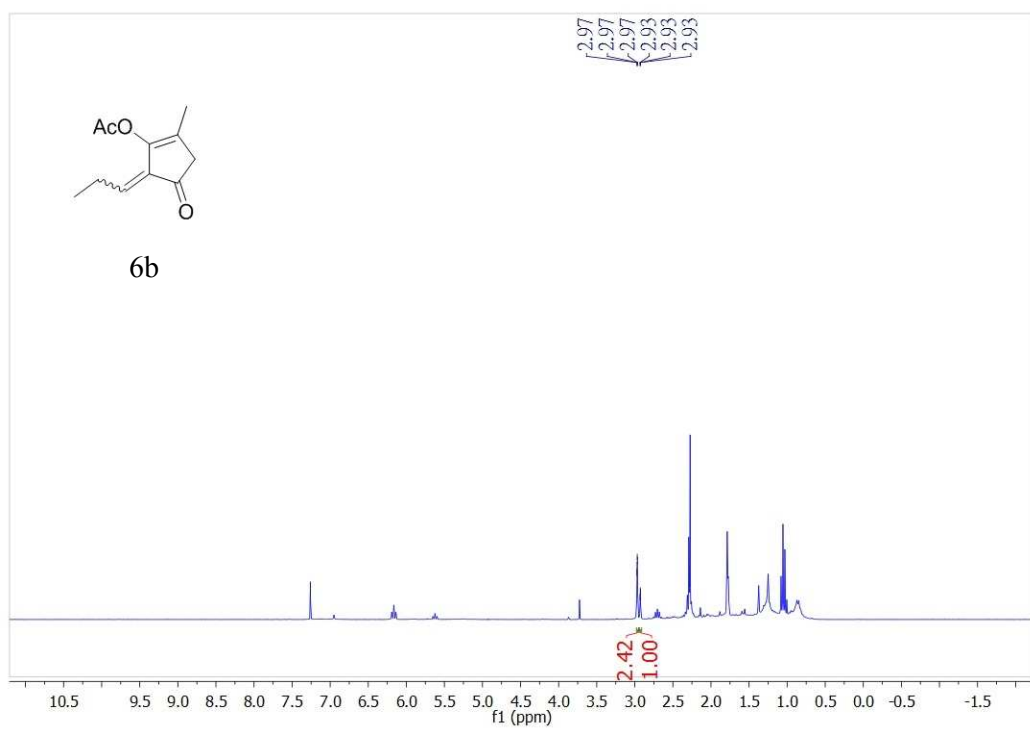

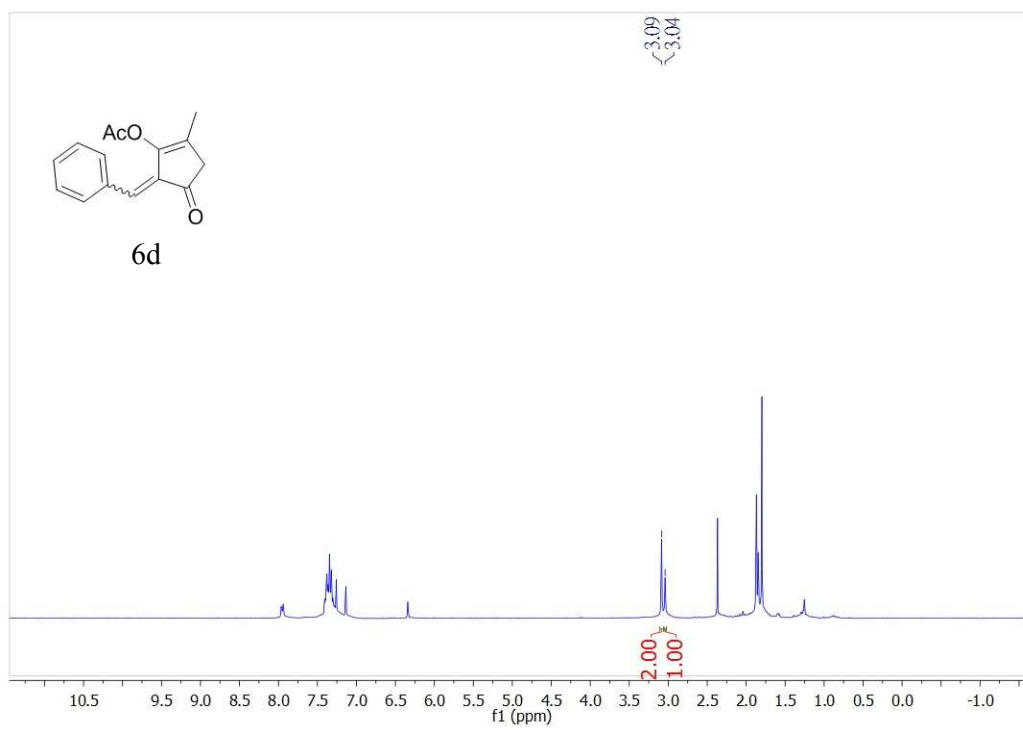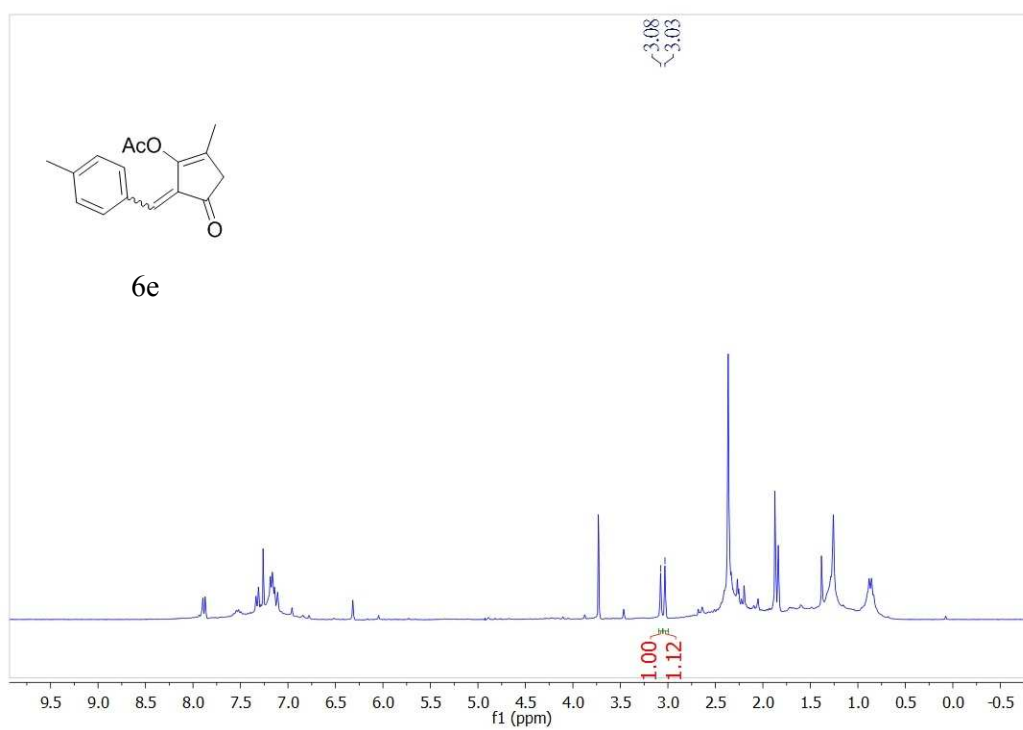

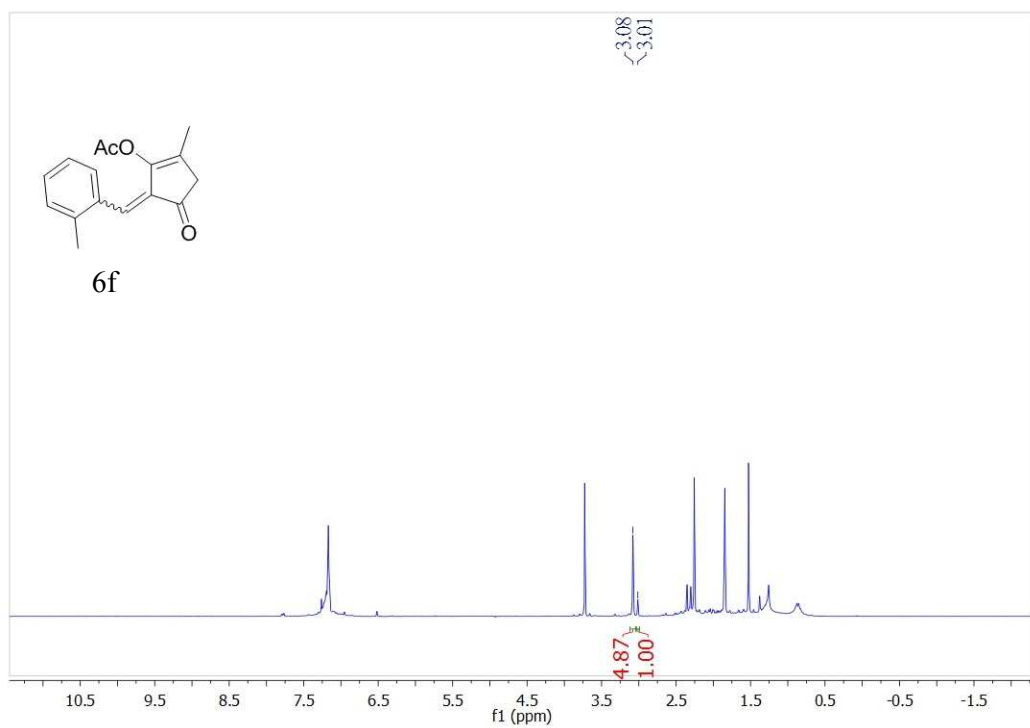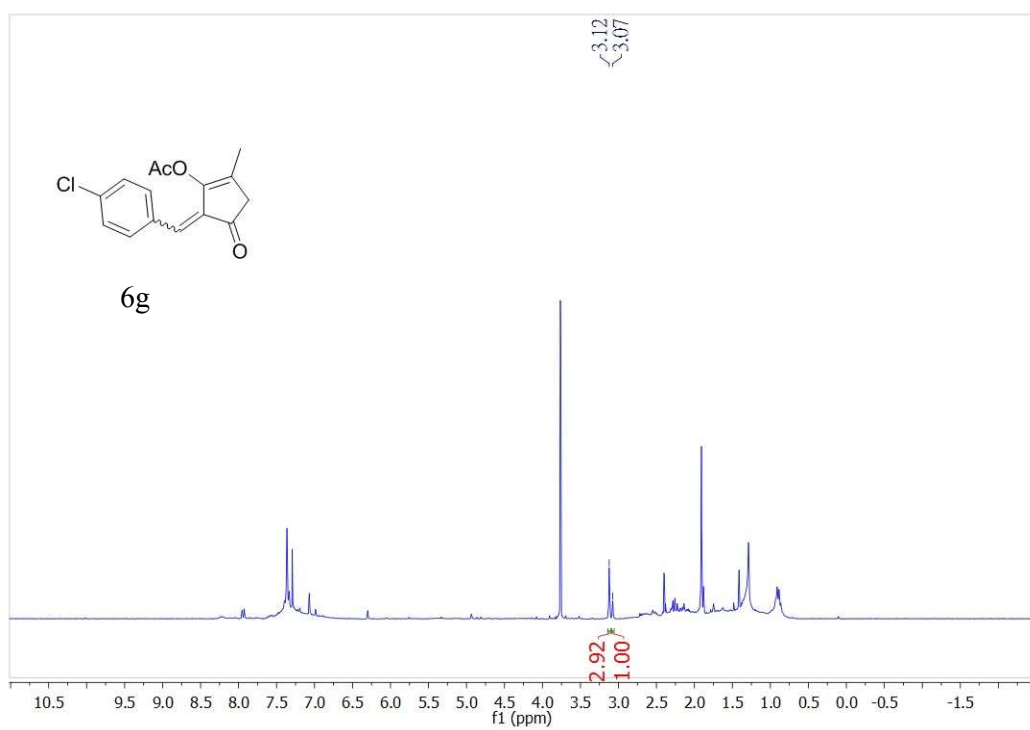

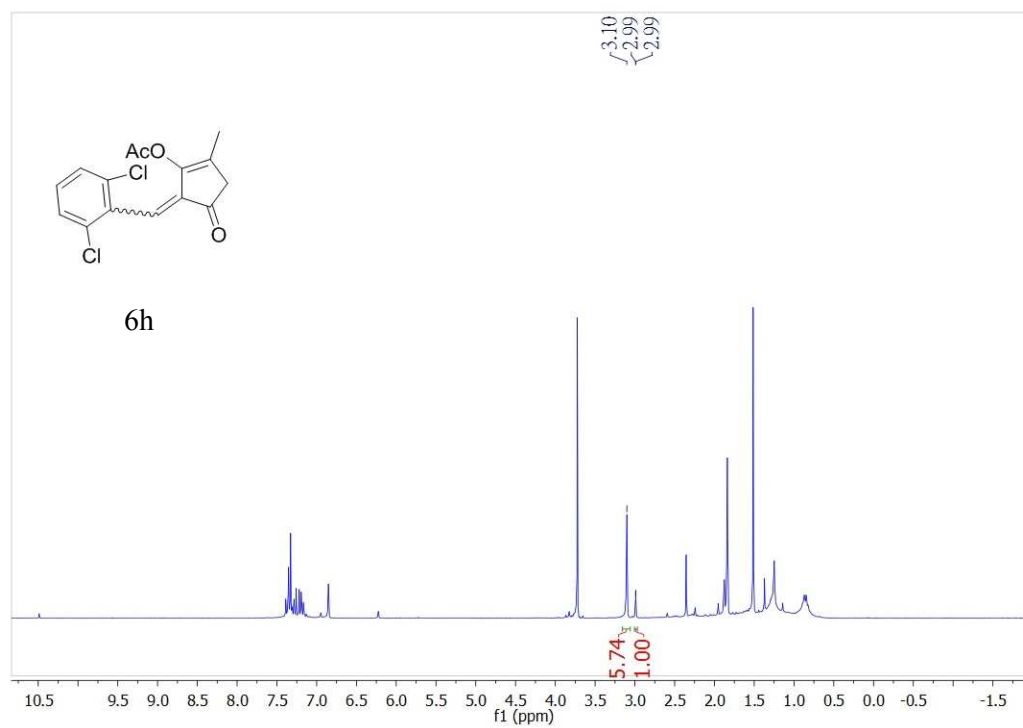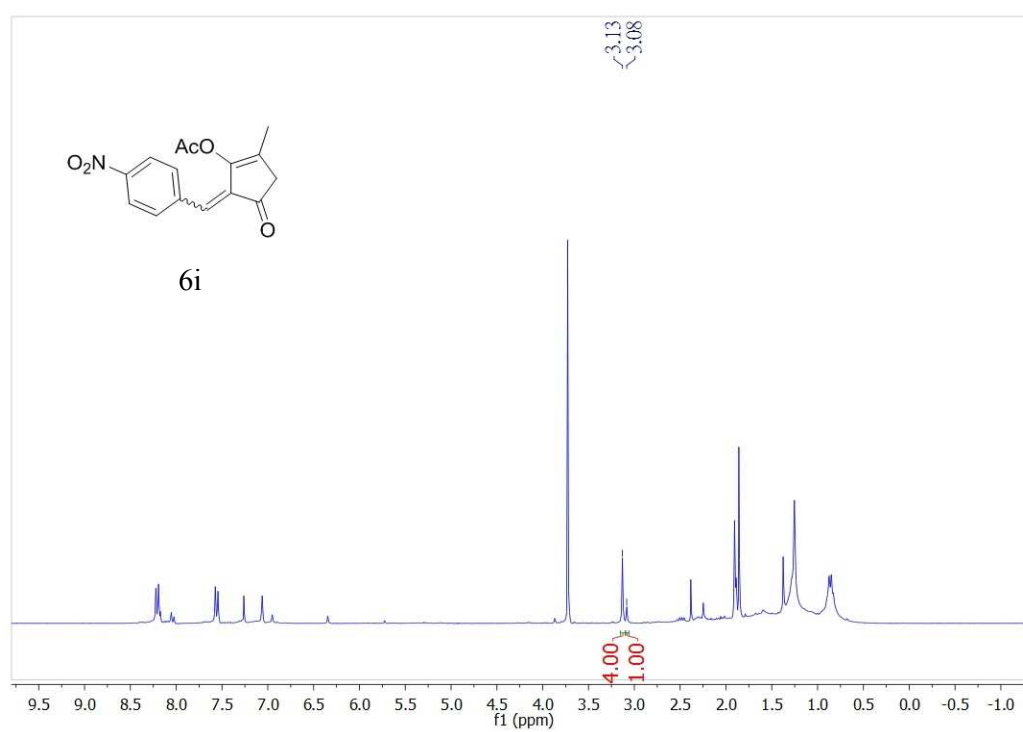

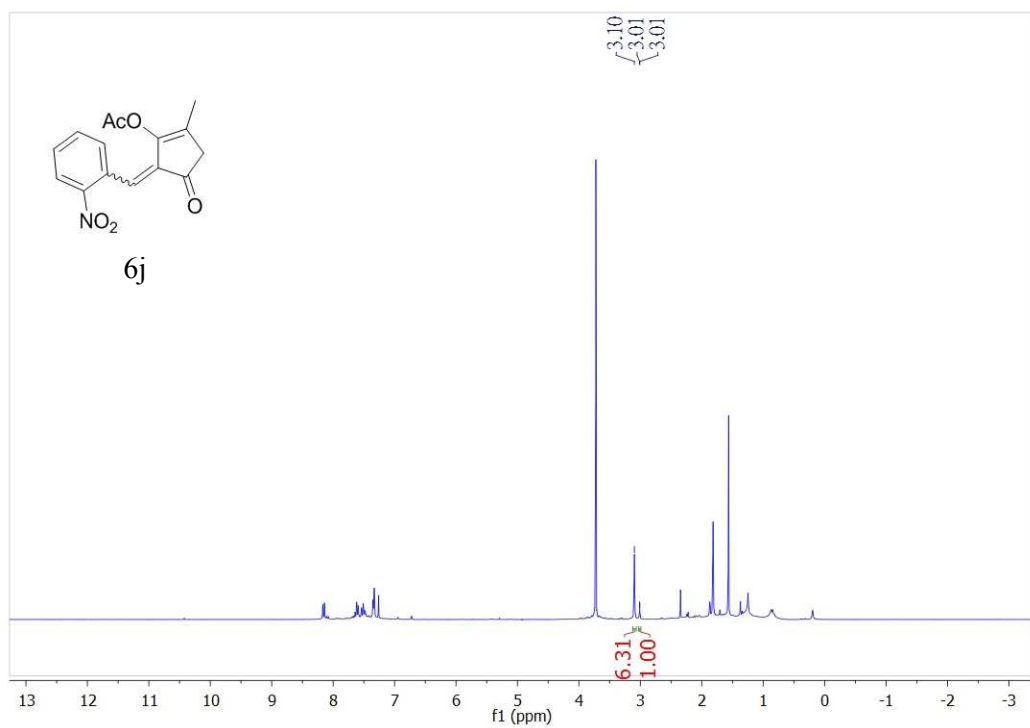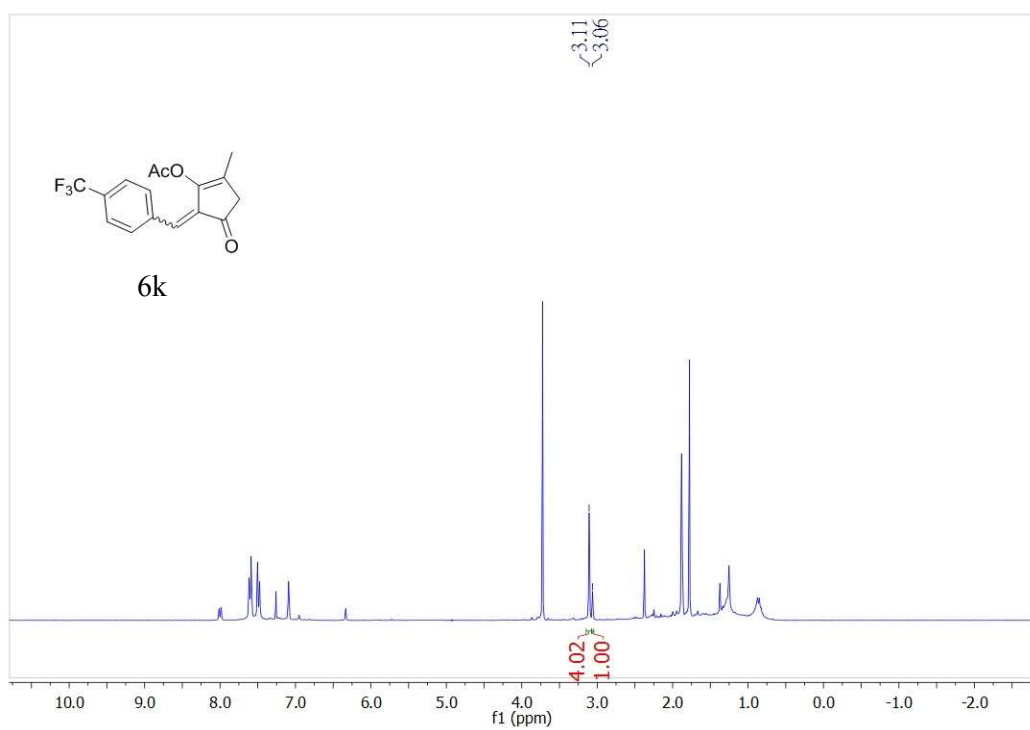

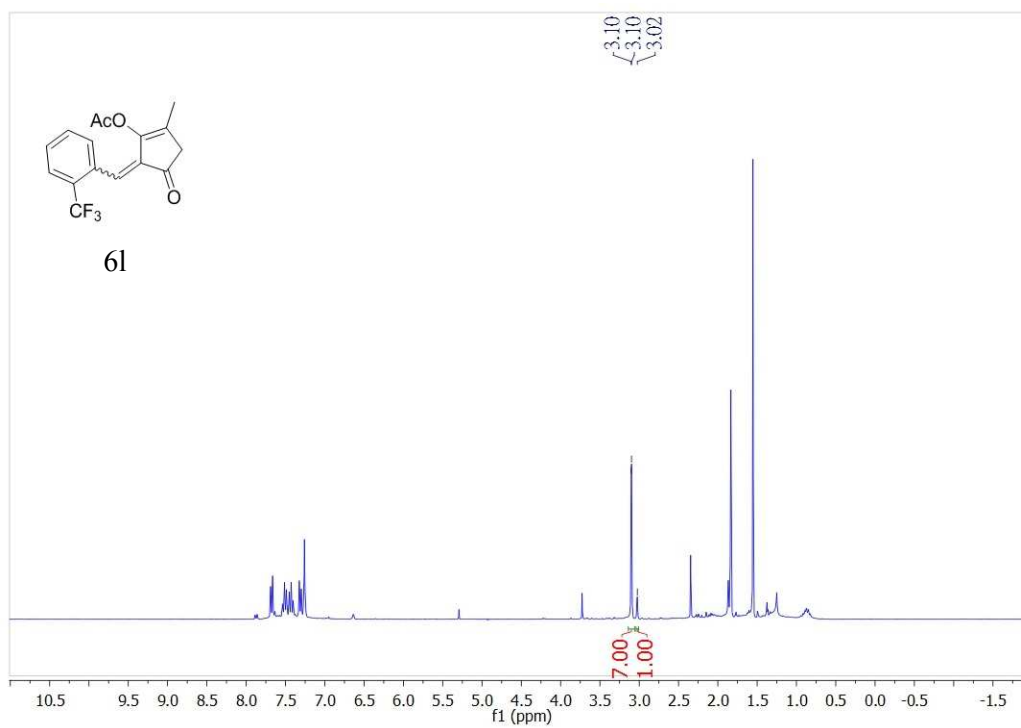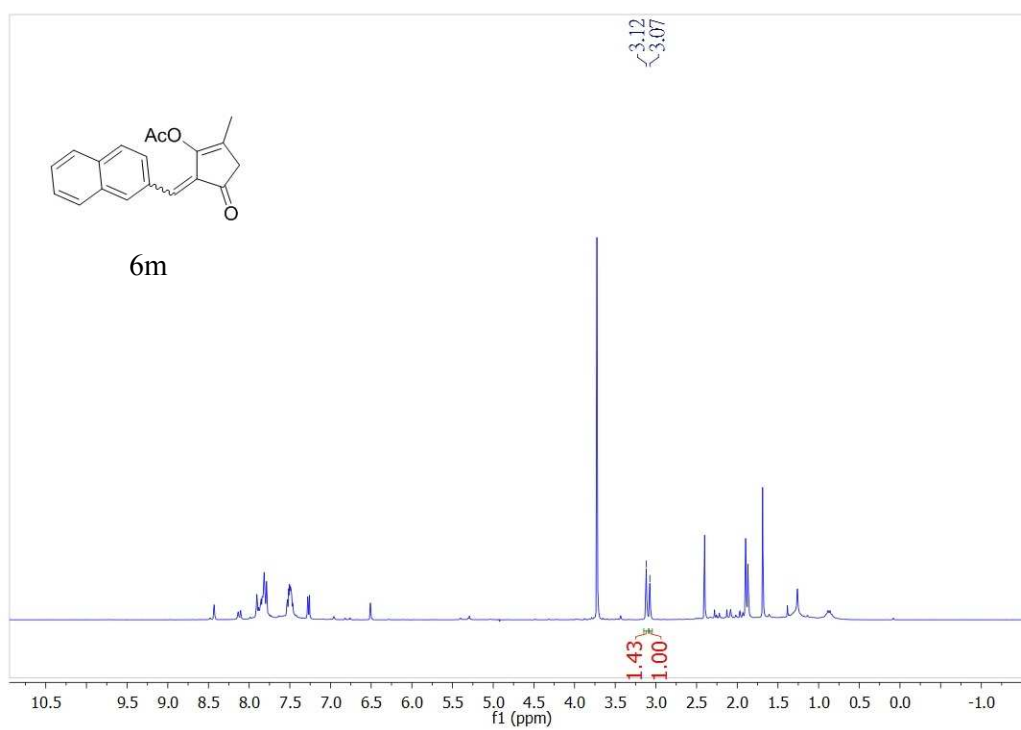

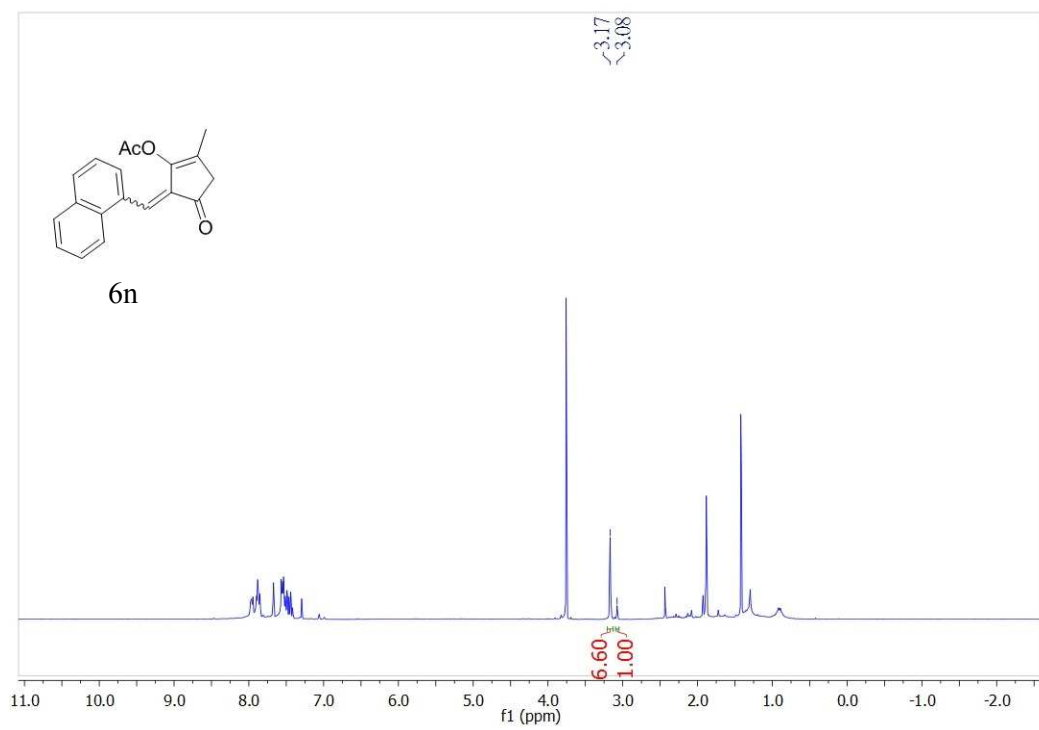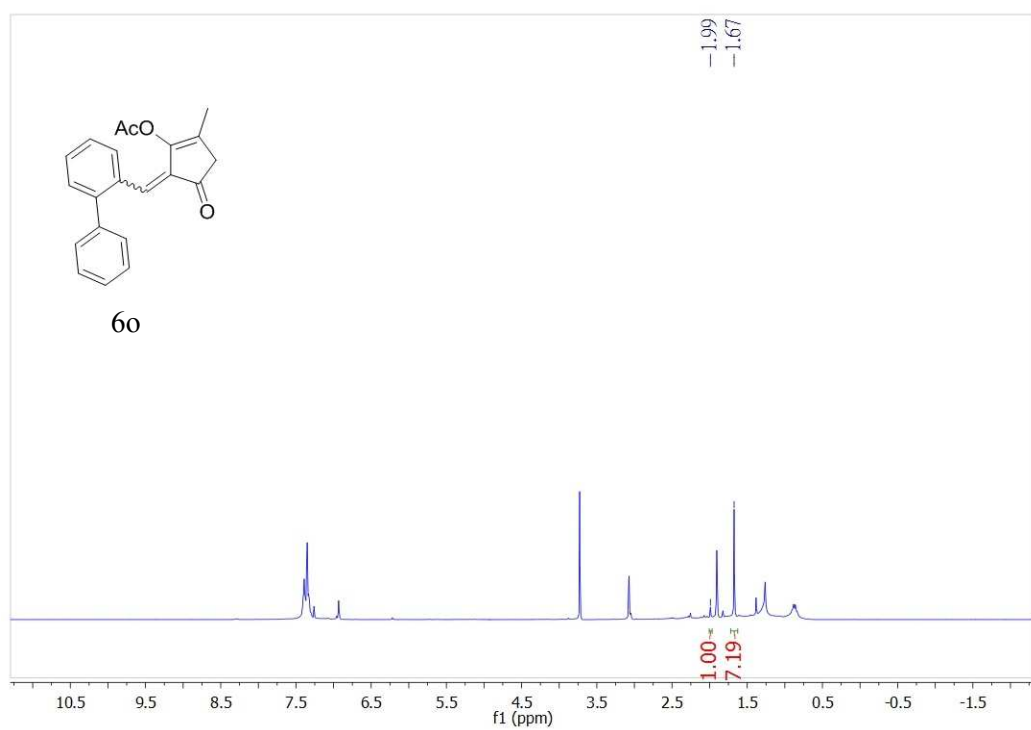



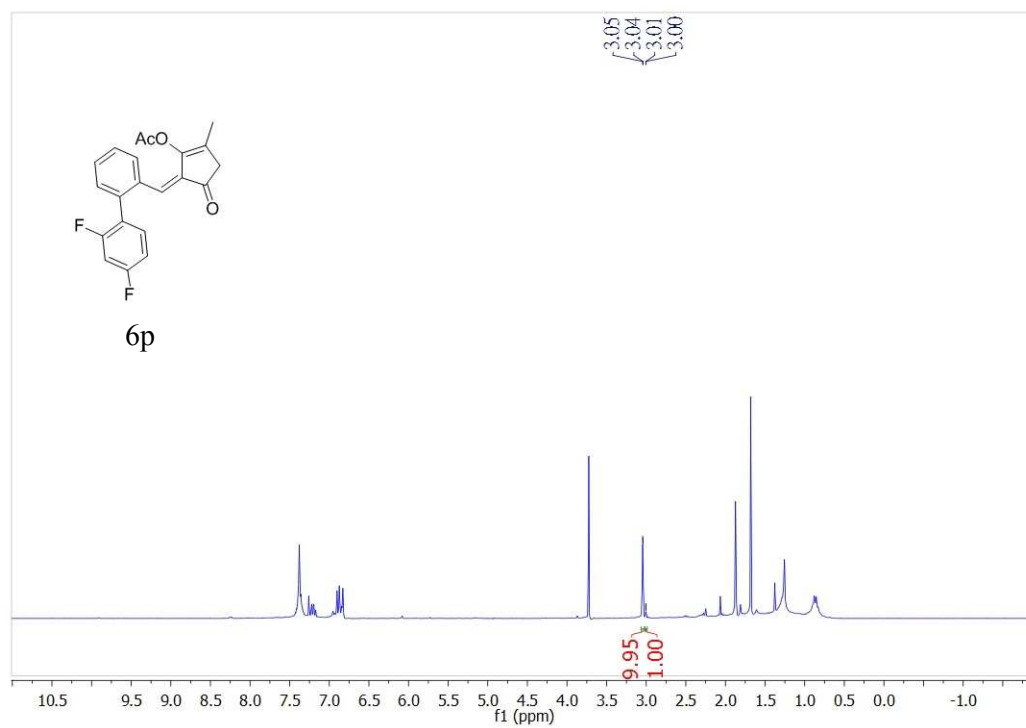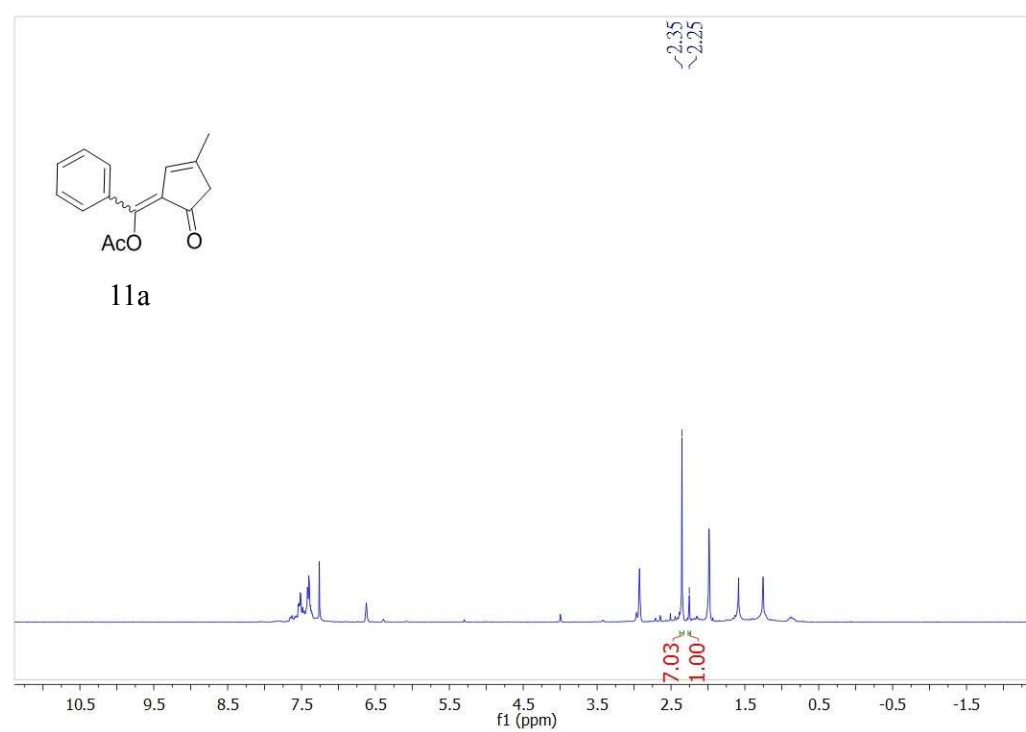

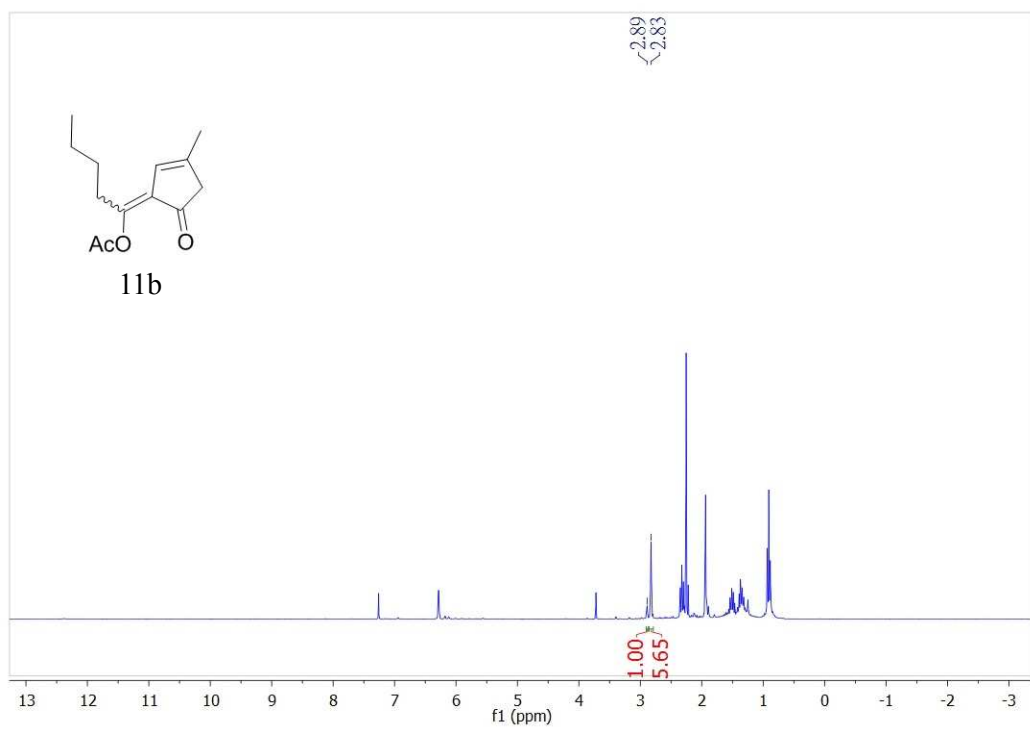

Supplement: Supplementary file 1 [file 4146313]
